# Supplementary material for: Population-based sequencing of Mycobacterium tuberculosis reveals how current population dynamics are shaped by past epidemics
Source: eLife. 2022 Jul 26;11:e76605. doi: 10.7554/eLife.76605 (PMC9323001; doi:10.7554/eLife.76605)
Supplement: Figure 1—source data 1. — Cluster ID; number of Spanish. Foreign and unknown origin cases and total cluster size are indicated. [file elife-76605-fig1-data1.xlsx]

## Sheet: Figure_3-source_data_1
Figure_3-source_data_1. Bayesian dating results for all clusters (CL) from Oxfordshire. Data include information of cluster date (in years AD); cluster distances (min. max. mean and median); most recent common ancestor (MRCA) time in years (AD) with corresponding 95% highest probability density (HPD) intervals and cluster time span or duration.
Cluster ID	Cluster size	Cluster AD range	Max CL AD	Min CL distance	Max CL distance	Mean CL distance	Median CL distance		median MRCA (yBP)	Median MRCA (AD)	MRCA 95% HPD (AD)		Cluster time span
CL01	3	[2011-2011]	2011	0	0	0	0	MRCA CL1	7.2	2008.8	[2003-2011.7]		2.2
CL02	2	[2007-2011]	2011	0	0	0	0	MRCA CL2	10	2006	[2001.3-2007.3]		5
CL03	3	[2007-2011]	2011	2	3	2.7	3	MRCA CL3	16.2	1999.8	[1992.3-2005.2]		11.2
CL04	3	[2007-2012]	2012	2	7	5.4	7	MRCA CL4	21.9	1994.1	[1982.5-2002.1]		17.9
CL05	7	[2008-2012]	2012	0	6	3.50	3	MRCA CL5	18.1	1997.9	[1990.7-2004.4]		14.1
CL06	2	[2007-2011]	2011	7	7	7	7	MRCA CL6	22.7	1993.3	[1981.9-2003.1]		17.7
								ancient DNA			[938.4-1050.9]
								GC outbreak			[1988.1-1993]
yBP: years before present
Cluster time span = max CL (AD) – median MRCA (AD)
