# Supplementary material for: Population-based sequencing of Mycobacterium tuberculosis reveals how current population dynamics are shaped by past epidemics
Source: eLife. 2022 Jul 26;11:e76605. doi: 10.7554/eLife.76605 (PMC9323001; doi:10.7554/eLife.76605)
Supplement: Figure 3—source data 2. — Median time of all the local TLs pointed in Figure 3—figure supplement 1 were classified in different time windows. The total number of links within each time window is indicated even if they were links within a genomic cluster (total_CL) or not (total_noCL). Sampling period for Oxfordshire is 2007–2012. [file elife-76605-fig3-data2.xlsx]

## Sheet: Figure_3-source_data_2
Figure_3-source_data_2. Bayesian dating results for all clusters (CL) from Malawi. Data include information of cluster date (in years AD); cluster distances (min. max. mean and median); Most recent common ancestor (MRCA) time in years (AD) with corresponding 95% highest probability density (HPD) intervals and cluster time span or duration.
Cluster ID	Cluster size	Cluster AD range	Max CL AD	Min CL distance	Max CL distance	Mean CL distance	Median CL distance		Median MRCA (yBP)	Median MRCA (AD)	MRCA 95% HPD (AD)		Cluster time span
CL01	4	[2008-2009]	2009	0	17	2022-08-10	2022-05-11	MRCA CL01	36	1980.0	[1967.4-1990.1]		29.0
CL02	9	[2008-2010]	2010	0	14	2022-06-05	1	MRCA CL02	2022-08-31	1984-02-01	[1975.4-1993.1]		2022-08-25
CL03	2	[2008-2008]	2008	0	0	0.0	0	MRCA CL03	2022-04-09	2006-06-01	[2002.2-2008]		2022-04-01
CL04	2	[2008-2008]	2008	0	0	0.0	0	MRCA CL04	2022-05-09	2006-05-01	[2001.7-2008]		2022-05-01
CL05	3	[2008-2009]	2009	0	14	2022-07-08	12	MRCA CL05	35.7	1980-03-01	[1966.4-1992.5]		2022-07-28
CL06	3	[2009-2009]	2009	0	4	2022-07-02	4	MRCA CL06	2022-03-16	1999-07-01	[1991.4-2006.4]		2022-03-09
CL07	2	[2009-2009]	2009	0	0	0.0	0	MRCA CL07	2022-03-08	2007-07-01	[2003.4-2009]		2022-03-01
CL08	2	[2010-2010]	2010	0	0	0.0	0	MRCA CL08	2022-04-07	2008-06-01	[2004-2010]		2022-04-01
CL09	2	[2008-2010]	2010	0	0	0.0	0	MRCA CL09	2022-02-09	2006-08-01	[2003.2-2008]		2022-02-03
CL10	2	[2009-2009]	2009	0	0	0.0	0	MRCA CL10	2022-04-08	2007-06-01	[2002.8-2009]		2022-04-01
CL11	3	[2008-2009]	2009	0	4	2022-03-02	3	MRCA CL11	2022-05-11	2004-05-01	[1999.5-2007.7]		2022-05-04
CL12	2	[2008-2008]	2008	1	1	1.0	1	MRCA CL12	2022-01-11	2004-09-01	[1999.4-2007.9]		3.1
CL13	4	[2008-2010]	2010	1	8	2022-05-04	2022-05-04	MRCA CL13	2022-04-25	1990-06-01	[1979-2000]		19.4
CL14	3	[2008-2010]	2010	1	11	2022-03-07	10	MRCA CL14	2022-03-28	1987-07-01	[1975.3-1998.5]		2022-03-22
CL15	4	[2008-2010]	2010	1	2	2022-05-01	2022-05-01	MRCA CL15	2022-06-14	2001-04-01	[1994.9-2006.7]		2022-06-08
CL16	2	[2008-2009]	2009	2	2	2.0	2	MRCA CL16	2022-02-12	2003-08-01	[1997.2-2007.9]		2022-02-05
CL17	2	[2008-2009]	2009	2	2	2.0	2	MRCA CL17	2022-07-12	2003-03-01	[1996.6-2007.4]		2022-07-05
CL18	2	[2009-2010]	2010	2	2	2.0	2	MRCA CL18	2022-08-11	2004-02-01	[1996.7-2009]		2022-08-05
CL19	2	[2008-2008]	2008	2	2	2.0	2	MRCA CL19	2022-07-12	2003-03-01	[1997-2007.4]		2022-07-04
CL20	2	[2008-2008]	2008	3	3	3.0	3	MRCA CL20	2022-07-15	2000-03-01	[1991.7-2006.5]		2022-07-07
CL21	2	[2008-2008]	2008	3	3	3.0	3	MRCA CL21	2022-04-14	2001-06-01	[1994-2006.7]		2022-04-06
CL22	2	[2009-2009]	2009	3	3	3.0	3	MRCA CL22	2022-08-13	2002-02-01	[1994.5-2007.6]		2022-08-06
CL23	2	[2010-2010]	2010	3	3	3.0	3	MRCA CL23	2022-09-12	2003-01-01	[1995.4-2008.7]		2022-09-06
CL24	2	[2008-2009]	2009	3	3	3.0	3	MRCA CL24	2022-08-13	2002-02-01	[1994.8-2007.2]		2022-08-06
CL25	6	[2009-2010]	2010	4	20	2022-04-12	12	MRCA CL25	37.2	1978-08-01	[1968.1-1988]		31.2
CL26	2	[2008-2008]	2008	4	4	4.0	4	MRCA CL26	2022-06-16	1999-04-01	[1991.1-2005.9]		2022-06-08
CL27	2	[2008-2009]	2009	5	5	5.0	5	MRCA CL27	2022-08-17	1998-02-01	[1989-2005.3]		2022-08-10
CL28	3	[2008-2010]	2010	5	10	2022-03-07	7	MRCA CL28	2022-03-24	1991-07-01	[1981-2000.3]		2022-03-18
CL29	2	[2008-2008]	2008	6	6	6.0	6	MRCA CL29	2022-06-19	1996-04-01	[1987.2-2003.9]		2022-06-11
CL30	2	[2008-2009]	2009	6	6	6.0	6	MRCA CL30	2022-05-21	1995.0	[1984-2003.4]		2022-01-14
CL31	3	[2008-2009]	2009	6	10	2022-03-08	9	MRCA CL31	2022-02-25	1990-08-01	[1980.6-1999.5]		2022-02-18
CL32	2	[2008-2009]	2009	6	6	6.0	6	MRCA CL32	2022-04-18	1997-06-01	[1988.9-2004.7]		2022-04-11
CL33	2	[2009-2009]	2009	7	7	7.0	7	MRCA CL33	2022-05-20	1995-05-01	[1985.3-2003.6]		2022-05-13
CL34	2	[2009-2009]	2009	7	7	7.0	7	MRCA CL34	2022-09-18	1997-01-01	[1989-2004.2]		2022-09-11
CL35	2	[2008-2008]	2008	7	7	7.0	7	MRCA CL35	22	1994.0	[1983.7-2002.4]		14.0
CL36	2	[2008-2010]	2010	7	7	7.0	7	MRCA CL36	2022-08-18	1997-02-01	[1987-2004.8]		2022-08-12
CL37	2	[2008-2010]	2010	8	8	8.0	8	MRCA CL37	23	1993.0	[1981.8-2001.6]		17.0
CL38	5	[2008-2010]	2010	1	14	2022-09-07	2022-05-10	MRCA CL38	33.9	1982-01-01	[1967.5-1993.5]		2022-09-27
CL39	2	[2008-2010]	2010	10	10	10.0	10	MRCA CL39	19	1997.0	[1989.4-2003.4]		13.0
CL40	2	[2008-2008]	2008	11	11	11.0	11	MRCA CL40	2022-08-27	1988-02-01	[1976.2-1998.3]		2022-08-19
								ancient DNA			[955.8-1056.1]
								GC outbreak			[1989.6-1993]
yBP: years before present
Cluster time span = max CL (AD) – median MRCA (AD)
