# Supplementary material for: Population-based sequencing of Mycobacterium tuberculosis reveals how current population dynamics are shaped by past epidemics
Source: eLife. 2022 Jul 26;11:e76605. doi: 10.7554/eLife.76605 (PMC9323001; doi:10.7554/eLife.76605)
Supplement: Figure 3—source data 3. — Data include information of cluster date (in years AD); cluster distances (min, max, mean, and median); most recent common ancestor (MRCA) time in years (AD) with corresponding 95% highest probability density (HPD) intervals and cluster time span or duration. [file elife-76605-fig3-data3.xlsx]

## Sheet: Figure_3-source_data_3
Figure_3-source_data_3. Bayesian dating results for all clusters (CL) from Valencia Region. Data include information of cluster date (in years AD); cluster distances (min. max. mean and median); most recent common ancestor (MRCA) time in years (AD) with corresponding 95% highest probability density (HPD) intervals and cluster time span or duration.
Cluster ID	Cluster size	Cluster AD range	Max CL AD	Min CL distance	Max CL distance	Mean CL distance	Median CL distance		Median MRCA (ybp)	Median MRCA (AD)	MRCA 95% HPD (AD)		Cluster time span	Figure 3-supplement
CL001	2	[2014-2015]	2015	10	10	10	10.0	MRCA CL001	2022-01-16	2000-09-01	[1993.3-2007]		2022-01-16	4
CL002	8	[2014-2016]	2016	0	4	2022-05-01	2022-05-01	MRCA CL002	2022-06-12	2004-04-01	[1997.5-2009.1]		2022-06-11	6
CL003	6	[2014-2016]	2016	0	14	2022-05-07	9.0	MRCA CL003	29.0	1988	[1976.6-1998.2]		28	6
CL004	5	[2014-2016]	2016	0	12	6	4.0	MRCA CL004	2022-01-26	1990-09-01	[1979.2-2001.9]		2022-01-25	5
CL005	3	[2014-2015]	2015	0	2	1	1.0	MRCA CL005	2022-06-08	2007.42	[2001-2012.1]		2022-06-07	3
CL007	4	[2014-2016]	2016	2	15	10	11.0	MRCA CL007	31.2	1985-08-01	[1972.5-1997.7]		30.2	4
CL008	4	[2014-2015]	2015	4	11	2022-05-07	2022-05-07	MRCA CL008	2022-06-20	1996-04-01	[1986.6-2005.5]		2022-06-18	5
CL010	5	[2014-2016]	2016	1	4	2022-02-02	2.0	MRCA CL010	2022-03-12	2004-07-01	[1997.2-2010.2]		2022-03-11	5
CL011	6	[2014-2016]	2016	0	4	2022-01-02	2.0	MRCA CL011	2022-08-10	2006-02-01	[1999.3-2011.5]		2022-08-09	4
CL012	3	[2014-2015]	2015	0	1	0.7	1.0	MRCA CL012	2022-09-06	2010-01-01	[2004.9-2014.2]		2022-09-04	4
CL015	2	[2014-2014]	2014	2	2	2	2.0	MRCA CL015	2022-03-08	2008-07-01	[2003.6-2012.5]		2022-03-05	5
CL016	4	[2014-2016]	2016	0	13	2022-02-09	2022-05-10	MRCA CL016	31.9	1985-01-01	[1972.2-1996.5]		2022-09-30	6
CL017	3	[2014-2015]	2015	1	4	2022-03-02	2.0	MRCA CL017	2022-03-09	2007-07-01	[2001.8-2012.2]		2022-03-07	5
CL018	3	[2015-2015]	2015	0	0	0	0.0	MRCA CL018	2022-04-05	2011-06-01	[2005.7-2014.5]		2022-04-03	6
CL019	4	[2015-2016]	2016	0	3	2022-03-01	1.0	MRCA CL019	2022-01-10	2006-09-01	[1998.9-2012.7]		2022-01-09	5
CL020	2	[2015-2016]	2016	10	10	10	10.0	MRCA CL020	2022-04-21	1995-06-01	[1985.3-2004.4]		2022-04-20	4
CL021	2	[2014-2015]	2015	7	7	7	7.0	MRCA CL021	2022-03-18	1998-07-01	[1992.4-2007.6]		2022-03-16	4
CL023	4	[2014-2016]	2016	3	17	2022-03-09	9.0	MRCA CL023	30.0	1987	[1973.8-1998.5]		29	4
CL024	3	[2014-2015]	2015	5	5	5	5.0	MRCA CL024	2022-05-17	1999-05-01	[1988.6-2007.6]		2022-05-15	5 / 6
CL025	3	[2014-2015]	2015	4	12	9	11.0	MRCA CL025	2022-03-25	1991-07-01	[1979.5-2002.1]		2022-03-23	5
CL026	6	[2014-2016]	2016	4	11	2022-06-07	8.0	MRCA CL026	2022-03-24	1992-07-01	[1982.9-2001.4]		2022-03-23	4
CL027	2	[2015-2016]	2016	3	3	3	3.0	MRCA CL027	2022-09-09	2007-01-01	[1998.9-2013.4]		2022-09-08	4
CL028	2	[2014-2015]	2015	0	0	0	0.0	MRCA CL028	2022-09-03	2013-01-01	[2008.7-2014.4]		2022-09-01	5
CL029	2	[2015-2015]	2015	0	0	0	0.0	MRCA CL029	2022-01-03	2013-09-01	[2009.5-2015.3]		2022-01-01	4
CL030	2	[2014-2016]	2016	0	0	0	0.0	MRCA CL030	2022-02-04	2012-08-01	[2009.4-2013.8]		2022-02-03	5
CL031	5	[2014-2016]	2016	0	3	2022-06-01	2022-05-01	MRCA CL031	2022-07-08	2008-03-01	[2001.7-2012.9]		2022-07-07	4
CL032	2	[2014-2014]	2014	0	0	0	0.0	MRCA CL032	2022-03-04	2012-07-01	[2008-2014]		2022-03-01	4
CL033	2	[2014-2014]	2014	0	0	0	0.0	MRCA CL033	2022-03-04	2012-07-01	[2007.6-2014]		2022-03-01	5
CL034	3	[2015-2016]	2016	1	2	2022-03-01	1.0	MRCA CL034	7.0	2010	[2004.3-2013.6]		6	6
CL035	2	[2015-2015]	2015	0	0	0	0.0	MRCA CL035	2022-09-03	2013-01-01	[2008.7-2014.5]		2022-09-01	6
CL037	4	[2015-2016]	2016	0	0	0	0.0	MRCA CL037	2022-07-05	2011-03-01	[2005.8-2014.9]		2022-07-04	4
CL038	2	[2014-2014]	2014	2	2	2	2.0	MRCA CL038	2022-03-09	2007-07-01	[1999.7-2012.9]		2022-03-06	5
CL041	2	[2015-2015]	2015	1	1	1	1.0	MRCA CL041	2022-09-04	2012-01-01	[2006.7-2014.9]		2022-09-02	5
CL042	2	[2014-2014]	2014	1	1	1	1.0	MRCA CL042	2022-02-06	2010-08-01	[2005.1-2013.7]		2022-02-03	5
CL050	3	[2014-2016]	2016	1	4	2022-07-02	3.0	MRCA CL050	2022-05-07	2009-05-01	[2003.7-2013.9]		2022-05-06	5
CL054	2	[2014-2015]	2015	2	2	2	2.0	MRCA CL054	2022-08-06	2010-02-01	[2003.4-2014.4]		2022-08-04	4
CL055	3	[2015-2016]	2016	0	2	2022-03-01	2.0	MRCA CL055	6.0	2011	[2004.4-2015]		5	4
CL056	2	[2015-2016]	2016	2	2	2	2.0	MRCA CL056	2022-01-06	2010-09-01	[2004.3-2015.1]		2022-01-05	5
CL058	2	[2015-2015]	2015	2	2	2	2.0	MRCA CL058	2022-06-07	2009-04-01	[2001.7-2014.2]		2022-06-05	4
CL063	3	[2014-2016]	2016	3	5	4	4.0	MRCA CL063	2022-06-11	2005-04-01	[1997.5-2010.7]		2022-06-10	6
CL065	2	[2015-2015]	2015	9	9	9	9.0	MRCA CL065	2022-06-19	1997-04-01	[1986.5-2006.9]		2022-06-17	5
CL066	2	[2014-2014]	2014	10	10	10	10.0	MRCA CL066	2022-09-20	1996-01-01	[1984.9-2005.5]		2022-09-17	5
CL068	2	[2014-2016]	2016	7	7	7	7.0	MRCA CL068	2022-01-12	2004-09-01	[1997.1-2011.3]		2022-01-11	6
CL069	5	[2014-2016]	2016	0	15	2022-08-07	8.0	MRCA CL069	2022-06-25	1991-04-01	[1980-2001]		2022-06-24	5
CL070	3	[2014-2016]	2016	7	9	2022-03-08	9.0	MRCA CL070	2022-09-23	1993-01-01	[1981.5-2003.4]		2022-09-22	6
CL074	2	[2014-2016]	2016	5	5	5.0	5.0	MRCA CL074	2022-09-13	2003-01-01	[1993.8-2010.6]		2022-09-12	4
CL077	2	[2014-2015]	2015	10	10	10	10.0	MRCA CL077	2022-07-26	1990-03-01	[1979.4-2000.4]		2022-07-24	6
CL081	2	[2015-2016]	2016	11	11	11	11.0	MRCA CL081	2022-08-28	1988-02-01	[1976.1-1999.3]		2022-08-27	6
CL082	3	[2015-2016]	2016	3	9	2022-07-06	8.0	MRCA CL082	2022-02-18	1998-08-01	[1988.4-2007.1]		2022-02-17	6
CL083	2	[2016-2016]	2016	5	5	5	5.0	MRCA CL083	2022-02-17	1999-08-01	[1989.3-2007.2]		2022-02-16	5
CL084	2	[2014-2016]	2016	6	6	6	6.0	MRCA CL084	2022-06-15	2001-04-01	[1992.5-2008.9]		2022-06-14	5
CL085	2	[2014-2016]	2016	4	4	4	4.0	MRCA CL085	2022-07-12	2004-03-01	[1994.8-2011.4]		2022-07-11	6
CL087	3	[2015-2016]	2016	1	4	2022-07-02	3.0	MRCA CL087	2022-01-09	2007-09-01	[2000.6-2013.6]		2022-01-08	4
CL089	2	[2016-2016]	2016	2	2	2.0	2.0	MRCA CL089	4.0	2013	[2008.9-2015.5]		3	6
CL090	2	[2015-2016]	2016	1	1	1	1.0	MRCA CL090	2022-05-09	2007-05-01	[1999.6-2012.6]		2022-05-08	6
CL091	2	[2016-2016]	2016	0	0	0	0.0	MRCA CL091	2022-03-02	2014-07-01	[2011.4-2015.9]		2022-03-01	6
CL093	2	[2016-2016]	2016	0	0	0	0.0	MRCA CL093	2022-09-01	2015-01-01	[2012.3-2016]		0.9	6
CL099	2	[2016-2016]	2016	10	10	10	10.0	MRCA CL099	2022-09-19	1997-01-01	[1985.5-2007]		2022-09-18	5
CL102	2	[2015-2016]	2016	7	7	7	7.0	MRCA CL102	2022-07-15	2001-03-01	[1989.7-2009.5]		2022-07-14	5
CL105	2	[2014-2016]	2016	4	4	4	4.0	MRCA CL105	12.0	2005	[1995.3-2011.5]		11	5
CL107	2	[2014-2016]	2016	4	4	4	4.0	MRCA CL107	2022-06-08	2008-04-01	[2000.6-2014.2]		2022-06-07	5
CL109	2	[2015-2016]	2016	1	1	1	1.0	MRCA CL109	2022-02-04	2012-08-01	[2006.6-2015.2]		2022-02-03	6
CL110	2	[2016-2016]	2016	1	1	1	1.0	MRCA CL110	2022-07-04	2012-03-01	[2007.3-2015.5]		2022-07-03	6
CL116	2	[2015-2016]	2016	0	0	0	0.0	MRCA CL116	2022-06-02	2014-04-01	[2010.7-2015.5]		2022-06-01	5
CL121	2	[2014-2016]	2016	0	0	0	0.0	MRCA CL121	2022-08-04	2012-02-01	[2007.8-2013.6]		2022-08-03	5
								ancient DNA			[917.9-1052.7]			3
								GC outbreak			[1988.7-1992.2]			3
								ancient DNA			[927.3-1056]			4
								GC outbreak			[1989.5-1992.9]			4
								ancient DNA			[944.9-1062.4]			5
								GC outbreak			[1989.2-1992.6]			5
								ancient DNA			[944.1-1063.4]			6
								GC outbreak			[1989.3-1992.5]			6
yBP: years before present
Cluster time span = max CL (AD) – median MRCA (AD)
