# Supplementary material for: Population-based sequencing of Mycobacterium tuberculosis reveals how current population dynamics are shaped by past epidemics
Source: eLife. 2022 Jul 26;11:e76605. doi: 10.7554/eLife.76605 (PMC9323001; doi:10.7554/eLife.76605)
Supplement: Figure 3—source data 4. — Median time of all the local TLs pointed in Figure 3—figure supplement 1 were classified in different time windows. The total number of links within each time window is indicated even if they were links within a genomic cluster (total_CL) or not (total_noCL). Sampling period for Oxfordshire is 2007–2012. [file elife-76605-fig3-data4.xlsx]

## Sheet: Figure_3-source_data_4
Figure_3-source_data_4. Number of transmission links traced back to 150 years before 2016 for Oxfordshire dataset. Median time of all the local transmission links (TL) pointed in Figure 3-figure supplement 1 were classified in different time windows. The total number of links within each time window is indicated. even if they were links within a genomic cluster (total_CL) or not (total_noCL). Sam…
				Time intervals back from 2016
CL ID	#TL (Fig. S2)	TL	CL size	0-5 y	5-10 y	10- 15 y	15- 20 y	20- 25 y	25- 30 y	30- 35y	35- 40y	40- 45y	45- 50y	50- 100 y	100-150 y	Min dist	Max dist	Mean dist	Median dist	Median time (AD)
CL01	1	ERR400369-ERR400322			x
CL01	4	CL01	3		x											0	0	0	0	2008-08-01
CL02	5	CL02	2		x											0	0	0	0	2006
CL03	7	ERR400528-ERR400383				x
CL03	11	CL03	3				x									2	3	2022-07-02	3	1999-08-01
CL04	9	ERR400507-ERR400439				x
CL04	13	CL04	3					x								2	7	2022-03-05	7	1994-01-01
	2	ERR400385-ERR400384			x
	3	ERR400343-ERR400334			x
	6	intra CL5 ancestors				x
	8	intra CL5 ancestors				x
	10	intra CL5 ancestors					x
CL05	12	CL05	5				x									0	6	2022-05-03	3	1997-09-01
CL06	14	CL06	2					x								7	7	7	7	1993-03-01
no_CL	15	ERR400547-ERR400548													x
total CL					5	4	3	2
total_noCL															1
total-TL					5	4	3	2							1
		mummies
		GC outbreak
