# Supplementary material for: Population-based sequencing of Mycobacterium tuberculosis reveals how current population dynamics are shaped by past epidemics
Source: eLife. 2022 Jul 26;11:e76605. doi: 10.7554/eLife.76605 (PMC9323001; doi:10.7554/eLife.76605)
Supplement: Figure 3—source data 5. — Analysis performed for Malawi. Median time of all the TLs pointed in Figure 3—figure supplement 2 were classified in different time windows. The total number of links within each time window is indicated even if they were links within a genomic cluster (total_CL) or not (total_noCL). Color code for links outside clusters (no_CL) are the same as in Figure 3—figure supplement 2. Sampling period for Malawi is 2008–2010. [file elife-76605-fig3-data5.xlsx]

## Sheet: Figure_3-source_data_5
Figure_3-source_data_5. Number of transmission links traced back to 150 years before 2016 for Malawi dataset. Analysis performed for Malawi. Median time of all the transmission links (TL) pointed in Figure 3-figure supplement 2 were classified in different time windows. The total number of links within each time window is indicated even if they were links within a genomic cluster (total_CL) or no…
				Time intervals back from 2016
CL ID	# TL (Fig. S3)	TL	CL size	0-5 y	5-10 y	10- 15 y	15- 20 y	20- 25 y	25- 30 y	30- 35y	35- 40y	40- 45y	45- 50y	50- 100 y	100-150 y	Min dist	Max dist	Mean dist	Median dist	Median time (AD)
CL01	9	ERR181808-ERR126620			x															2006-08-01
CL01	61	ERR212146-ERR181815								x
CL01	66	CL01	4								x					0	17	2022-08-10	2022-05-11	1980
CL02	6	ERR181838-ERR181803			x															2007-02-01
CL02	57	ERR216972-ERR216968							x
CL02	13	internal CL02 ancestor			x
CL02	14	internal CL02 ancestor				x
CL02	15	internal CL02 ancestor				x
CL02	24	internal CL02 ancestor				x
CL02	35	internal CL02 ancestor				x														1987-05-01
CL02	59	CL02	9							x						0	14	2022-06-05	1	1984-02-01
CL03	10	CL03	2		x											0	0	0	0	2006-06-01
CL04	11	CL04	2		x											0	0	0	0	2006-05-01
CL05	5	ERR212139-ERR126633	3		x															2007-05-01
CL05	65	CL05	3								x					0	14	2022-07-08	12	1980-03-01
CL06	4	ERR212141-ERR181839			x															2007-05-01
CL06	38	CL06	3				x									0	4	2022-07-02	4	1999-07-01
CL07	2	CL07	2		x											0	0	0	0	2007-07-01
CL08	1	CL08	2		x											0	0	0	0	2008-06-01
CL09	7	CL09	2		x											0	0	0	0	2006-08-01
CL10	3	CL10	2		x											0	0	0	0	2007-06-01
CL11	8	ERR221594-ERR124634			x															2006-08-01
CL11	19	CL11	3			x										0	4	2022-03-02	3	2004-05-01
CL12	17	CL12	2			x										1	1	1	1	2004-09-01
CL13	22	ERR181804-ERR181790				x														2003-09-01
CL13	31	internal CL13 ancestor				x
CL13	54	CL13	4						x							1	8	2022-05-04	2022-05-04	1990-06-01
CL14	12	ERR216982-ERR212154			x															2006-05-01
CL14	56	CL14	3						x							1	11	2022-03-07	10	1987-07-01
CL15	16	ERR221586-ERR181850				x
CL15	21	internal CL15 ancestor				x
CL15	33	CL15	4			x										1	2	2022-05-01	2022-05-01	2001-04-01
CL16	23	CL16	2			x										2	2	2	2	2003-08-01
CL17	26	CL17	2			x										2	2	2	2	2003-03-01
CL18	20	CL18	2			x										2	2	2	2	2004-02-01
CL19	25	CL19	2			x										2	2	2	2	2003-03-01
CL20	36	CL20	2				x									3	3	3	3	2000-03-01
CL21	32	CL21	2			x										3	3	3	3	2001-06-01
CL22	30	CL22	2			x										3	3	3	3	2002-02-01
CL23	28	CL23	2			x										3	3	3	3	2003-01-01
CL24	29	CL24	2			x										3	3	3	3	2002-02-01
CL25	37	ERR212173-ERR126637					x													2000-02-01
CL25	58	internal CL25 ancestor							x
CL25	60	internal CL25 ancestor								x
CL25	63	internal CL25 ancestor								x
CL25	67	CL25	6								x					4	20	2022-04-12	12	1978-08-01
CL26	39	CL26	2				x									4	4	4	4	1999-04-01
CL27	41	CL27	2				x									5	5	5	5	1998-02-01
CL28	40	ERR212177-ERR124643					x													1999-01-01
CL28	52	CL28	3					x								5	10	2022-03-07	7	1991-07-01
CL29	46	CL29	2				x									6	6	6	6	1996-04-01
CL30	49	CL30	2					x								6	6	6	6	1994.95
CL31	47	ERR126640-ERR126617						x												1995-07-01
CL31	53	CL31	3						x							6	10	2022-03-08	9	1990-08-01
CL32	42	CL32	2				x									6	6	6	6	1997-06-01
CL33	48	CL33	2					x								7	7	7	7	1995-05-01
CL34	44	CL34	2				x									7	7	7	7	1997-01-01
CL35	50	CL35	2					x								7	7	7	7	1994
CL36	43	CL36	2				x									7	7	7	7	1997-02-01
CL37	51	CL37	2					x								8	8	8	8	1993
CL38	18	ERR181855-ERR181809				x														2004-07-01
CL38	27	ERR216964-ERR212129				x														2003-02-01
CL38	34	internal CL38 ancestor				x
CL38	64	CL38	5							x						1	14	2022-09-07	2022-05-10	1982-01-01
CL39	45	CL39	2				x									10	10	10	10	1997
CL40	55	CL40	2						x							11	11	11	11	1988-02-01
no_CL	78	Node_1												x
no_CL	86	Node_2												x
no_CL	83	Node_3												x
no_CL	77	Node_4												x
no_CL	85	Node_5												x
no_CL	87	Node_6												x
no_CL	89	Node_7												x
no_CL	88	Node_8												x
no_CL	70	Node_9											x
no_CL	80	Node_10												x
no_CL	76	Node_11												x
no_CL	71	Node_12												x
no_CL	69	Node_13											x
no_CL	82	Node_14												x
no_CL	84	Node_15												x
no_CL	79	Node_16												x
no_CL	72	Node_17												x
no_CL	74	Node_18												x
no_CL	73	Node_19												x
no_CL	81	Node_20												x
no_CL	75	Node_21												x
no_CL	94	Node_22													x
no_CL	98	Node_23													x
no_CL	97	Node_24													x
no_CL	106	Node_25													x
no_cluster	108	Node_26													x
no_cluster	103	Node_27													x
no_cluster	110	Node_28													x
no_cluster	101	Node_29													x
no_cluster	99	Node_30													x
no_cluster	100	Node_31													x
no_cluster	114	Node_32													x
no_cluster	107	Node_33													x
no_cluster	91	Node_34													x
no_cluster	90	Node_35													x
no_cluster	95	Node_36													x
no_cluster	102	Node_37													x
no_cluster	93	Node_38													x
no_cluster	92	Node_39													x
no_cluster	109	Node_40													x
no_cluster	116	Node_41													x
no_cluster	104	Node_42													x
no_cluster	96	Node_43													x
no_cluster	112	Node_44													x
no_cluster	115	Node_45													x
no_cluster	111	Node_46													x
no_cluster	105	Node_47													x
no_cluster	113	Node_48													x
no_cluster	68	Node_49	14-18								x
no_cluster	62	Node_50	13								x
total CL					13	22	11	6	6	5	3	0	0	0	0
total_noCL					0	0	0	0	0	0	2	0	2	19	27
total-TL					13	22	11	6	6	5	5	0	2	19	27
