# Supplementary material for: Population-based sequencing of Mycobacterium tuberculosis reveals how current population dynamics are shaped by past epidemics
Source: eLife. 2022 Jul 26;11:e76605. doi: 10.7554/eLife.76605 (PMC9323001; doi:10.7554/eLife.76605)
Supplement: Figure 3—source data 6. — Median time of all the TLs pointed in Figure 3—figure supplements 3–6 were classified in different time windows. The total number of links within each time window is indicated even if they were links within a genomic cluster (total_CL) or not (total_noCL). Color code for links outside clusters (no_CL) are the same as in Figure 3—figure supplements 3–6. Sampling period for Valencia is 20014–2016. The percentage of Spanish cases within each TL was evaluated in a global phylogeny as a proxi of the origin of the node. [file elife-76605-fig3-data6.xlsx]

## Sheet: Figure_3-source_data_6
Figure_3-source_data_6. Number of transmission links (TL) traced up to 150 years before 2016 for Valencia dataset. Median time of all the transmission links (TL) pointed in Figure 3-supplement figure 3-6 were classified in different time windows. The total number of links within each time window is indicated even if they were links within a genomic cluster (total_CL) or not (total_noCL). Color co…
				Time intervals back from 2016
Cluster ID	# TL (Fig. S4)	TL	CL size	0-5 y	5-10 y	10- 15 y	15- 20 y	20- 25 y	25- 30 y	30- 35y	35- 40y	40- 45y	45- 50y	50- 100 y	100-150 y	Min dist	Max dist	Mean dist	Median dist	Median time (AD)	Percetage of Spanish cases within each TL
CL001	93	CL001	2				x									10	10	10	10	1982-01-01	100% Spanish
CL002	30	internal CL002		x
CL002	42	internal CL002		x
CL002	47	internal CL002		x
CL002	55	internal CL002			x
CL002	64	internal CL002			x
CL002	76	internal CL002			x
CL002	85	CL002	8			x										0	4	2022-05-01	2022-05-01	2004-04-01	100% Spanish
CL003	11	internal CL003	7	x
CL003	53	internal CL003			x
CL003	87	internal CL003				x
CL003	110	internal CL003						x
CL003	120	CL003	6						x							0	14	2022-05-07	9	1971-06-01	100% Spanish
CL004	22	G260-G108		x																2012-07-01
CL004	72	internal CL004			x
CL004	84	internal CL004				x
CL004	115	CL004	5					x								0	12	6	4	1990-09-01	100% Spanish
CL005	35	G1330-G679	3	x
CL005	57	CL005	3		x											0	2	1	1	2007.42	unknown
CL007	49	G909-G1788	4		x
CL007	118	G562m-G249							x
CL007	122	CL007	4							x						2	15	10	11	1985-08-01	100% Spanish
CL008	94	internal CL008	4				x
CL008	96	internal CL008					x
CL008	106	CL008	4				x									4	11	2022-05-07	2022-05-07	1996-04-01	100% Spanish
CL010	19	G76-G1965		x																2011-02-01
CL010	37	G1181-G1180		x																2013
CL010	67	internal CL010			x
CL010	83	CL010	5			x										1	4	2022-02-02	2	2004-07-01	100% Spanish
CL011	5	G932-G837m	6	x																2014-03-01
CL011	45	internal CL011			x
CL011	50	internal CL011			x
CL011	59	internal CL011			x
CL011	75	CL011	6		x											0	4	2022-01-02	2	2006-02-01	100% Spanish
CL012	12	G317m-G1563		x																2012-09-01
CL012	43	CL012	3		x											0	1	0.7	1	2010-01-01	100% Spanish
CL015	54	CL015	2		x											3	3	3	3	1982-08-01	100% Spanish
CL016	14	G623m-G1303		x																2013-03-01
CL016	101	internal CL016					x
CL016	125	CL016	4							x						0	13	2022-02-09	2022-05-10	1985-01-01	100% Spanish
CL017	38	G262-G1190		x																2011-02-01
CL017	66	CL017	3		x											1	4	2.33	2	2007-07-01	100% Spanish
CL018	9	G682-G1438		x																2013-07-01
CL018	33	CL018	3	x												0	0	0	0	2011-06-01	100% Spanish
CL019	15	G992-G991		x																2013-06-01
CL019	34	internal CL019		x
CL019	70	CL019	4		x											0	3	1.33	1	2006-09-01	100% Spanish
CL020	108	CL020	2					x								10	10	10	10	1995-06-01	100% Spanish
CL021	100	CL021	2				x									7	7	7	7	1998-07-01	100% Spanish
CL023	73	G830m-G1644			x															2006-05-01
CL023	90	internal CL023				x
CL023	121	CL023	4						x							3	17	2022-03-09	9	1987	100% Spanish
CL024	78	G583m-G1018	3			x														2005-03-01
CL024	97	CL024	3				x									5	5	5	5	1999-05-01	100% Spanish
CL025	61	G233-G1322	3		x															2007-09-01
CL025	113	CL025	3					x								4	12	9	11	1991-07-01	100% Spanish
CL026	74	internal CL026	6		x
CL026	89	internal CL026				x
CL026	109	internal CL026						x
CL026	112	CL026	6					x								4	11	2022-06-07	8	1992-07-01	100% Spanish
CL027	69	CL027	2		x											3	3	3	3	2007-01-01	100% Spanish
CL028	17	CL028	2	x												0	0	0	0	2013-01-01	100% Spanish
CL029	8	CL029	2	x												0	0	0	0	2013-09-01	100% Spanish
CL030	20	CL030	2	x												0	0	0	0	2012-08-01	100% Spanish
CL031	13	G271-G1090	5	x
CL031	29	internal CL031		x
CL031	44	internal CL031			x
CL031	58	CL031	5		x											0	3	2022-06-01	2022-05-01	2008-03-01	100% Spanish
CL032	23	CL032	2	x												0	0	0	0	2012-07-01	100% Spanish
CL033	24	CL033	2	x												0	0	0	0	2012-07-01	100% Spanish
CL034	32	G669-G1537		x
CL034	48	CL034	3		x											1	2	2022-03-01	1	2010	100% Spanish
CL035	16	CL035	2	x												0	0	0	0	2013-01-01	100% Spanish
CL037	2	internal CL037		x
CL037	10	G1910-G1513		x																2015
CL037	36	CL037	4	x												0	0	0	0	2011-03-01	100% Spanish
CL038	65	CL038	2		x											2	2	2	2	2007-07-01	100% Spanish
CL041	28	CL041	2	x												1	1	1	1	2012-01-01	100% Spanish
CL042	41	CL042	2		x											1	1	1	1	2010-08-01	100% Spanish
CL050	26	G835m-G1799		x																2012-03-01
CL050	51	CL050	3		x											1	4	2022-07-02	3	2009-05-01	100% Spanish
CL054	46	CL054	2		x											2	2	2	2	2010-02-01	100% Spanish
CL055	6	G1616-G1061	3	x																2014-01-01
CL055	39	CL055	3	x												0	2	2022-03-01	2	2011	100% Spanish
CL056	40	CL056	2		x											2	2	2	2	2010-09-01	100% Spanish
CL058	52	CL058	2		x											2	2	2	2	2009-04-01	100% Spanish
CL063	60	G1946-G152	3		x															2008-01-01
CL063	77	CL063	3			x										3	5	4	4	2005-04-01	100% Spanish
CL065	104	CL065	2				x									9	9	9	9	1997-04-01	100% Spanish
CL066	107	CL066	2				x									10	10	10	10	1996-01-01	100% Spanish
CL068	82	CL53	2			x										7	7	7	7	2004-09-01	100% Spanish
CL069	7	G848m-G538m					x													1997-06-01
CL069	71	G1785-G1653		x																2014-01-01
CL069	103	internal CL069			x
CL069	114	CL069	5					x								0	15	2022-08-07	8	1991-04-01	100% Spanish
CL070	102	G307m-G1745					x													1997-08-01
CL070	111	CL070	3					x								7	9	2022-03-08	9	1993-01-01	100% Spanish
CL074	88	CL074	2			x										5	5	5	5	2003-01-01	100% Spanish
CL077	116	CL077	4					x								10	10	10	10	1975-03-01	100% Spanish
CL081	119	CL081	2						x							11	11	11	11	1988-02-01	100% Spanish
CL082	63	G1693-G1661			x															2007-09-01
CL082	99	CL082	3				x									3	9	2022-07-06	8	1998-08-01	100% Spanish
CL083	95	CL083	2				x									5	5	5	5	1999-08-01	100% Spanish
CL084	91	CL084	2			x										6	6	6	6	2001-04-01	100% Spanish
CL085	86	CL085	2			x										4	4	4	4	2004-03-01	100% Spanish
CL087	31	G980-G1627	3	x																2011-09-01
CL087	62	CL087	3		x											1	4	2022-07-02	3	2007-09-01	100% Spanish
CL089	18	CL089	2	x												2	2	2	2	2013	100% Spanish
CL090	68	CL090	2		x											1	1	1	1	2007-05-01	100% Spanish
CL091	3	CL091	2	x												0	0	0	0	2014-07-01	100% Spanish
CL093	1	CL093	2	x												0	0	0	0	2015-01-01	100% Spanish
CL099	105	CL099	2				x									10	10	10	10	1997-01-01	100% Spanish
CL102	92	CL102	2			x										7	7	7	7	2001-03-01	100% Spanish
CL105	81	CL105	2			x										4	4	4	4	2005	100% Spanish
CL107	56	CL107	2		x											4	4	4	4	2008-04-01	100% Spanish
CL109	21	CL109	2	x												1	1	1	1	2012-08-01	100% Spanish
CL110	25	CL110	2	x												1	1	1	1	2012-03-01	100% Spanish
CL116	4	CL116	2	x												0	0	0	0	2014-04-01	100% Spanish
CL121	27	CL09	2	x												0	0	0	0	2012-02-01	100% Spanish
noCL_S4-2	125	Node_1								x											75% Spanish
noCL_S4-2	139	Node_2										x									100% Spanish
noCL_S4-2	136	Node_3										x									100% Spanish
noCL_S4-2	130	Node_4									x										100% Spanish
noCL_S4-2	124	Node_4b							x												87.5% Spanish
noCL_S4-2	123	Node_5								x											100% Spanish
noCL_S4-2	133	Node_6									x										75% Spanish
noCL_S4-2	127	Node_7									x										100% Spanish
noCL_S4-2	151	Node_8												x							100% Spanish
noCL_S4-2	149	Node_9												x							67% Spanish
noCL_S4-2	181	Node_10													x						100% Spanish
noCL_S4-2	158	Node_11													x						100% Spanish
noCL_S4-2	165	Node_12													x						100% Spanish
noCL_S4-2	179	Node_13													x						100% Spanish
noCL_S4-2	155	Node_14													x						100% Spanish
noCL_S4-2	159	Node_15													x						75% Spanish
noCL_S4-2	186	Node_16													x						80% Spanish
noCL_S4-2	178	Node_17													x						100% Spanish
noCL_S4-2	177	Node_18													x						100% Spanish
noCL_S4-2	180	Node_19													x						100% Spanish
noCL_S4-2	153	Node_20													x						100% Spanish
noCL_S4-2	168	Node_21													x						80% Spanish
noCL_S4-2	160	Node_22													x						78% Spanish
noCL_S4-2	152	Node_23													x						100% Spanish
noCL_S4-2	175	Node_24													x						100% Spanish
noCL_S4-2	182	Node_25													x						100% Spanish
noCL_S4-2	157	Node_26													x						100% Spanish
noCL_S4-3	131	Node_1									x										100% Spanish
noCL_S4-3	121	Node_2								x											100% Spanish
noCL_S4-3	126	Node_3								x											100% Spanish
noCL_S4-3	138	Node_4										x									100% Spanish
noCL_S4-3	135	Node_5									x										100% Spanish
noCL_S4-3	120	Node_6								x											100% Spanish
noCL_S4-3	134	Node_7									x										100% Spanish
noCL_S4-3	114	Node_8							x												100% Spanish
noCL_S4-3	129	Node_9									x										100% Spanish
noCL_S4-3	132	Node_10									x										100% Spanish
noCL_S4-3	145	Node_11												x							100% Spanish
noCL_S4-3	147	Node_12												x							100% Spanish
noCL_S4-3	146	Node_13												x							100% Spanish
noCL_S4-3	183	Node_14													x						22% Spanish
noCL_S4-3	169	Node_15													x						100% Spanish
noCL_S4-3	161	Node_16													x						100% Spanish
noCL_S4-3	163	Node_17													x						100% Spanish
noCL_S4-3	154	Node_18													x						100% Spanish
noCL_S4-3	172	Node_19													x						92% Spanish
noCL_S4-3	176	Node_20													x						92% Spanish
noCL_S4-3	170	Node_21													x						75% Spanish
noCL_S4-3	173	Node_22													x						100% Spanish
noCL_S4-3	156	Node_23													x						100% Spanish
noCL_S4-4	140	Node_1										x									100% Spanish
noCL_S4-4	141	Node_2											x								67% Spanish
noCL_S4-4	143	Node_3											x								100% Spanish
noCL_S4-4	128	Node_4								x											100% Spanish
noCL_S4-4	137	Node_5										x									100% Spanish
noCL_S4-4	142	Node_6											x								100% Spanish
noCL_S4-4	150	Node_7												x							100% Spanish
noCL_S4-4	148	Node_8												x							100% Spanish
noCL_S4-4	144	Node_9												x							100% Spanish
noCL_S4-4	164	Node_10												x							100% Spanish
noCL_S4-4	174	Node_11												x							100% Spanish
noCL_S4-4	162	Node_12												x							100% Spanish
noCL_S4-4	184	Node_13												x							100% Spanish
noCL_S4-4	166	Node_14												x							100% Spanish
noCL_S4-4	185	Node_15												x							100% Spanish
noCL_S4-4	171	Node_16												x							100% Spanish
noCL_S4-4	167	Node_17												x							100% Spanish
total CL				41	35	14	14	9	4	2	0	0	0	0	0
total_noCL									6	6	8	5	3	16	27
Total-TL				41	35	14	14	9	6	8	8	5	3	16	27
