# Supplementary material for: Population-based sequencing of Mycobacterium tuberculosis reveals how current population dynamics are shaped by past epidemics
Source: eLife. 2022 Jul 26;11:e76605. doi: 10.7554/eLife.76605 (PMC9323001; doi:10.7554/eLife.76605)
Supplement: Supplementary file 1. — Laboratory and epidemiological data associated. WGS data includes all the information obtained by WGS; run accession number are included in the ENA projects PRJEB29604 and PRJEB38719; depth coverage. MTBC lineage. genomic and epidemiological clusters ID. Patient information including: age, gender, country of birth, year of arrival to Spain, and province of residence in the Valencia region. NA indicates not available epidemiological information. [file elife-76605-supp1.xlsx]

## Sheet: Supplementary File 1
Supplementary File 1. Samples included in this study and all clinical. laboratory and epidemiological data associated. WGS data includes all the information obtained by WGS; run accession number are included in the ENA projects PRJEB29604 and PRJEB38719; depth coverage. MTBC lineage. genomic and epidemiological clusters ID. Patient information including: age. gender. country of birth. year of arr…
Sample ID		WGS data				Patient information						Social risk factors and comorbidities							Disease diagnosis
	Study_accesion	RUN_accession	WGS Depth coverage	MTBC lineage	Genomic Cluster ID	EPI_Cluster ID	Age	Gender	Country of birth	Arrival to Spain (year)	Province residence	Alcohol abuse	PDU	Imprisonment	Diabetes	HIV infected	Homeless	Healthcare workers	Sputum smear	Culture	Disease type	TB state	Declaration year	Symptoms onset	Treatment start	Diagnostic date	Diagnostic delay
G368m	PRJEB29604	ERR2884685	114.4	L4.1.2.1	CL001		51	male	RUMANIA	2014	VALENCIA	no	no	no	yes	no	no	no	positive	positive	pulmonary	initial	2014	2014-06-01	2014-07-02	2014-07-02	NO
G401m	PRJEB29604	ERR2884686	135.6	L4.1.2.1	CL001		32	female	SPAIN	-	ALICANTE	no	no	no	no	no	no	no	negative	positive	pulmonary	initial	2014		2014-07-12	2014-06-25
G553m	PRJEB29604	ERR2884696	107.9	L4.1.2.1	CL001		77	female	SPAIN	-	VALENCIA	no	no	no	no	no	no	no	positive	positive	pulmonary	initial	2014	2014-05-12	2014-08-22	2014-08-20	YES
G566m	PRJEB29604	ERR2884698	131.6	L4.1.2.1	CL001		40	male	RUMANIA	2004	VALENCIA		no	no	no	no	no	no	positive	positive	pulmonary	previous treatment	2014	2014-10-24	2014-11-06	2014-11-06	NO
G1163	PRJEB29604	ERR2884621	151.6	L4.1.2.1	CL001		41	male	RUMANIA	2006	CASTELLON	yes	no	no	no	no	yes	no	negative	positive	pulmonary	previous treatment	2015	2015-08-08	2015-08-20	2015-08-19	NO
G1288m	PRJEB29604	ERR2884628	128.9	L4.1.2.1	CL001		28	male	RUMANIA	2007	VALENCIA		no	no	no		NA	no	positive	positive	pulmonary	initial	2015	2015-07-13	2015-09-02	2015-09-01	NO
G1411	PRJEB29604	ERR2884636	140.6	L4.1.2.1	CL001		3	female	SPAIN	-	VALENCIA	no	no	no	no	no	no	no	negative	positive	extrapulmonary	initial	2015	2015-10-24	2015-12-24	2015-12-24	NO
G201	PRJEB29604	ERR2884678	101.7	L4.10	CL002		37	male	ECUADOR	2000	VALENCIA	no	no	yes	no	no	no	no	negative	positive	extrapulmonary	initial	2014	2014-04-02	2014-05-06	2014-05-06	NO
G621m	PRJEB29604	ERR2884699	166.2	L4.10	CL002		3	male	SPAIN	-	VALENCIA	no	no	no	no	no	no	no	negative	positive	pulmonary	previous treatment	2014	2014-12-03	2014-12-09	2014-12-09	NO
G637m	PRJEB29604	ERR2884702	146.9	L4.10	CL002		19	male	SPAIN	-	VALENCIA	no	no	no	no	no	no	no	negative	positive	pulmonary	initial	2015	2015-02-08	2015-02-16	2015-02-16	NO
G882m	PRJEB29604	ERR2884721	175.8	L4.10	CL002	2226	24	male	SPAIN	-	VALENCIA	no	no	no	no	no	NA	no	positive	positive	pulmonary	initial	2015	2015-01-03	2015-02-28	2015-02-28	NO
G1008	PRJEB29604	ERR2884611	175.6	L4.10	CL002	NA	NA	NA	NA	NA	VALENCIA	NA	NA	NA	NA	NA	no	NA	NA	NA	NA	NA	NA	NA	NA	NA	NA
G1011	PRJEB29604	ERR2884612	208.8	L4.10	CL002	1959	18	female	SPAIN	-	VALENCIA	no	no	no	no	no	no	yes	positive	positive	pulmonary	initial	2015	2015-07-01	2015-07-08	2015-07-08	NO
G1449	PRJEB29604	ERR2884640	112.5	L4.10	CL002	1959	56	male	SPAIN	-	VALENCIA	no	yes	no	yes	yes	no	no	negative	positive	pulmonary	initial	2015	2015-07-21	2015-08-05	2015-08-05	NO
G1571	PRJEB29604	ERR2884649	99.7	L4.10	CL002		20	female	SPAIN	-	VALENCIA	no	no	no	no	no	no	no	positive	positive	pulmonary	initial	2016	2016-01-25	2016-03-09	2016-03-09	NO
G1603	PRJEB29604	ERR2884654	116.2	L4.10	CL002		64	male	SPAIN	-	VALENCIA	no	no	no	no	no	no	no	negative	positive	pulmonary	initial	2016	2016-04-27	2016-05-04	2016-04-30	NO
G1610	PRJEB29604	ERR2884655	122.5	L4.10	CL002	NA	NA	NA	NA	NA	VALENCIA	NA	NA	NA	NA	NA	no	NA	NA	NA	NA	NA	NA	NA	NA	NA	NA
G1732	PRJEB29604	ERR2884663	186.7	L4.10	CL002		58	male	SENEGAL	2008	CASTELLON	no	no	no	no	no	no	no	positive	positive	pulmonary		2016	2015-12-22	2016-01-20	2016-01-20	NO
G1823	PRJEB29604	ERR2884670	148.1	L4.10	CL002		24	male	SPAIN	-	VALENCIA	no	no	no	no	no	no	no	negative	positive	pulmonary	initial	2016	2016-09-01	2016-10-11	2016-09-28	NO
G04	PRJEB29604	ERR2884727	160.1	L4.10	CL003		52	male	SPAIN	-	CASTELLON	no	yes	yes	no	yes	yes	no	positive	positive	pulmonary	initial	2014	2013-12-15	2014-02-07	2014-02-07	NO
G145	PRJEB29604	ERR2884641	86.9	L4.10	CL003		78	female	SPAIN	-	CASTELLON	no	no	no	no	no	no	no	positive	positive	pulmonary	initial	2014	2014-03-18	2014-04-01	2014-03-18	NO
G258	PRJEB29604	ERR2884682	134.6	L4.10	CL003		30	male	SPAIN	-	VALENCIA	no	no	no	no	no	NA	no	positive	positive	pulmonary	initial	2014	2014-08-06	2014-08-19	2014-08-20	NO
G1246	PRJEB29604	ERR2884625	182.8	L4.10	CL003		45	male	SPAIN	-	VALENCIA	yes	yes	yes	no	no	no	no	positive	positive	pulmonary	initial	2015	2015-07-03	2015-09-02	2015-09-02	NO
G1308	PRJEB29604	ERR2884631	142.9	L4.10	CL003		80	male	SPAIN	-	VALENCIA		no	no	no	no	no	yes	negative	positive	pulmonary	initial	2015	2015-07-01	2015-11-12	2015-11-04	YES
G1577	PRJEB29604	ERR2884650	75.3	L4.10	CL003		36	male	SPAIN	-	VALENCIA	yes	no	no	no	no	no	no	negative	positive	pulmonary	initial	2016	2016-02-26	2016-04-06	2016-03-23	NO
G99	PRJEB29604	ERR2884726	61.7	L4.3.3	CL004		51	male	SPAIN	-	ALICANTE	no	no	no	no	yes	no	no	negative	positive	pulmonary	initial	2014	2014-01-17	2014-06-04	2014-06-03	YES
G108	PRJEB29604	ERR2884615	86.8	L4.3.3	CL004		43	male	SPAIN	-	VALENCIA	yes	no	yes	no	yes	no	no	positive	positive	pulmonary	initial	2014	2014-05-01	2014-05-15	2014-05-15	NO
G260	PRJEB29604	ERR2884683	113.6	L4.3.3	CL004		77	male	SPAIN	-	VALENCIA	no	no	no	no	no	no	no	positive	positive	pulmonary	initial	2014	2014-09-11	2014-09-19	2014-09-19	NO
G1320	PRJEB29604	ERR2884632	144.7	L4.3.3	CL004		42	female	SPAIN	-	VALENCIA		no	no	yes	no	no	no	positive	positive	pulmonary	initial	2015	2015-09-29	2015-10-25	2015-10-25	NO
G1350	PRJEB29604	ERR2884635	104.6	L4.3.3	CL004		49	male	SPAIN	-	ALICANTE	yes		no			no	no	negative	positive	pulmonary		2015			2015-12-22
G1839	PRJEB29604	ERR2884672	120.3	L4.3.3	CL004	NA	NA	NA	NA	NA	VALENCIA	NA	NA	NA	NA	NA	no	NA	NA	NA	NA	NA	NA	NA	NA	NA	NA
G114	PRJEB29604	ERR2884618	71.6	L2.2.1	CL005		37	female	SPAIN	-	VALENCIA	no	no	no	no		no	no	negative	positive	pulmonary	initial	2014	2014-04-10	2014-04-30	2014-04-30	NO
G679m	PRJEB29604	ERR2884703	173.6	L2.2.1	CL005		49	female	SPAIN	-	VALENCIA	no	no	no	no	no	no	no	positive	positive	pulmonary	initial	2015	2015-01-20	2015-02-06	2015-02-06	NO
G813m	PRJEB29604	ERR2884712	103.7	L2.2.1	CL005	NA	NA	NA	NA	NA	VALENCIA	NA	NA	NA	NA	NA	no	NA	NA	NA	NA	NA	NA	NA	NA	NA	NA
G815m	PRJEB29604	ERR2884713	109.1	L2.2.1	CL005	NA	NA	NA	NA	NA	VALENCIA	NA	NA	NA	NA	NA	no	NA	NA	NA	NA	NA	NA	NA	NA	NA	NA
G1330	PRJEB29604	ERR2884633	96.6	L2.2.1	CL005		46	male	SPAIN	-	VALENCIA	yes	no	no	no	no	no	no	positive	positive	pulmonary	initial	2015	2015-09-07	2015-11-16	2015-11-16	NO
G249	PRJEB22237	ERR2099784	192.5	L4.1.2.1	CL007	1397	39	male	SPAIN	-	VALENCIA		no	no	no	no	no	no	positive	positive	pulmonary	previous treatment	2013	2013-08-29	2013-09-21	2013-09-20	NO
G562m	PRJEB29604	ERR2884697	142.7	L4.1.2.1	CL007		45	male	SPAIN	-	VALENCIA	yes	no	no	no	yes	no	no	negative	positive	pulmonary	previous treatment	2014	2014-03-10	2014-06-12	2014-05-27	NO
G909	PRJEB29604	ERR2884722	144.2	L4.1.2.1	CL007		39	male	SPAIN	-	VALENCIA	no	no	no	no	no	no	no	negative	positive	pulmonary	previous treatment	2015	2015-05-04	2015-05-22	2015-05-22	NO
G1590	PRJEB22237	ERR2099780	103.1	L4.1.2.1	CL007	1397	44	male	SPAIN	-	VALENCIA	no	no	no	no	no	no	no	positive	positive	pulmonary	previous treatment	2013	2013-01-15	2013-01-29	2013-01-25	NO
G1788	PRJEB29604	ERR2884668	136.1	L4.1.2.1	CL007		36	male	SPAIN	-	VALENCIA	no	no	no	no	no	no	no	positive	positive	pulmonary	initial	2016	2016-09-21	2016-10-24	2016-10-24	NO
G693m	PRJEB29604	ERR2884704	138.9	L4.10	CL008	1786	56	male	SPAIN	-	VALENCIA	yes	no	no	yes	no	no	no	positive	positive	pulmonary	initial	2015	2015-02-01	2015-03-03	2015-03-03	NO
G764m	PRJEB29604	ERR2884707	158.3	L4.10	CL008	1786	46	male	SPAIN	-	VALENCIA		no	no	no	no	yes	no	positive	positive	pulmonary	initial	2015	2014-12-15	2015-02-18	2015-02-18	NO
G1261	PRJEB29604	ERR2884627	147.5	L4.10	CL008		76	male	SPAIN	-	VALENCIA	no	no	no	yes	no	no	no	positive	positive	pulmonary	previous treatment	2014	2014-11-10	2014-11-20	2014-11-20	NO
G1432	PRJEB29604	ERR2884637	123.6	L4.10	CL008		51	male	SPAIN	-	VALENCIA	yes	no	no	no	no	no	no	positive	positive	pulmonary	initial	2015	2015-09-20	2015-10-30	2015-10-27	NO
G788FE29	PRJEB29604	ERR2884711	65.9	L4.3.3	CL009		29	male	BOLIVIA	2000	VALENCIA	no	no	no	no	no	no	no	positive	positive	pulmonary	initial	2013	2013-02-10	2013-03-24	2013-03-24	NO
G839m	PRJEB29604	ERR2884716	149.5	L4.3.3	CL009		40	female	BOLIVIA	2004	VALENCIA	no	no	no	no	no	no	no	positive	positive	pulmonary		2015	2014-03-01	2014-12-30	2014-12-30	YES
G850m	PRJEB29604	ERR2884718	98.1	L4.3.3	CL009		32	female	BOLIVIA	2004	VALENCIA	no	no	no	no	no	no	no	negative	positive	extrapulmonary	initial	2015	2015-02-15	2015-02-25	2015-02-25	NO
G1015	PRJEB29604	ERR2884613	138.3	L4.3.3	CL009		38	male	ECUADOR	2003	VALENCIA	no	no	no	no	yes	no	no	positive	positive	pulmonary	previous treatment	2015	2015-06-17	2015-07-17	2015-07-17	NO
G76	PRJEB29604	ERR2884706	80.9	L4.3.2	CL010		27	female	SPAIN	-	ALICANTE	no	no	no	no	no	no	no	positive	positive	pulmonary	initial	2014	2014-01-17	2014-02-24	2014-02-24	NO
G405m	PRJEB29604	ERR2884687	84.5	L4.3.2	CL010		37	male	COLOMBIA	2001	ALICANTE	no	no	no	no	no	no	no	negative	positive	pulmonary	initial	2014	2014-08-04	2014-09-26	2014-09-26	NO
G1180	PRJEB29604	ERR2884622	171.4	L4.3.2	CL010	1948	45	female	SPAIN	-	ALICANTE	no	no	no	no	no	no	no	positive	positive	pulmonary	initial	2015	2015-07-10	2015-08-13	2015-08-13	NO
G1181	PRJEB29604	ERR2884623	130.1	L4.3.2	CL010	1948	21	male	SPAIN	-	ALICANTE	no	no	no	no	no	no	no	positive	positive	pulmonary	initial	2015	2015-08-01	2015-08-14	2015-08-14	NO
G1446	PRJEB29604	ERR2884639	155.9	L4.3.2	CL010		52	male	SPAIN	-	ALICANTE	no	no	no	no	no	no	no	negative	positive	pulmonary	initial	2016	2015-11-12	2016-03-03	2016-03-01	YES
G1965	PRJEB29604	ERR2884677	62.8	L4.3.2	CL010	2141	5	female	SPAIN	-	ALICANTE	no	no	no	no	no	no	no	negative	positive	pulmonary	initial	2016	2016-04-28	2016-05-05	2016-04-29	NO
G446	PRJEB29604	ERR2884688	48.0	L4.1.2.1	CL011		38	female	SPAIN	-	VALENCIA	no	no	no	no	no	no	no	negative	positive	pulmonary	initial	2014	2013-10-04	2014-01-23	2014-01-23	YES
G837m	PRJEB29604	ERR2884715	136.0	L4.1.2.1	CL011		49	male	SPAIN	-	VALENCIA	no	no	no	no	no	no	no	positive	positive	pulmonary	previous treatment	2015	2014-12-24	2015-04-29	2015-04-29	YES
G881m	PRJEB29604	ERR2884720	129.0	L4.1.2.1	CL011	1784	46	female	SPAIN	-	VALENCIA	no	no	no	no	no	no	no	positive	positive	pulmonary	initial	2015	2015-01-31	2015-02-14	2015-02-14	NO
G932	PRJEB29604	ERR2884724	141.1	L4.1.2.1	CL011		36	male	SPAIN	-	VALENCIA	no	no	no	no	no	no	yes	negative	positive	pulmonary	initial	2015	2015-01-20	2015-07-07	2015-07-07	YES
G1188	PRJEB29604	ERR2884624	98.7	L4.1.2.1	CL011		55	male	SPAIN	-	VALENCIA	no	no	no	yes	no	no	no	positive	positive	pulmonary	initial	2014	2014-09-10	2014-12-10	2014-12-02	NO
G1567	PRJEB29604	ERR2884647	114.7	L4.1.2.1	CL011		60	male	SPAIN	-	VALENCIA	no		no	no		no	no	positive	positive	pulmonary	initial	2016	2016-05-23	2016-05-31	2016-05-31	NO
G317m	PRJEB38719	ERR4195335	151.8	L4.1.2.1	CL012		46	male	SPAIN	-	CASTELLON	yes	no	yes	no	no	no	no	positive	positive	pulmonary	initial	2014	2014-09-01	2014-09-26	2014-09-26	NO
G1089	PRJEB38719	ERR4195667	144.2	L4.1.2.1	CL012		52	male	SPAIN	-	CASTELLON	no	no	yes	no	no	yes	no	negative	positive	extrapulmonary	initial	2014	2014-11-03	2014-11-26	2014-11-28	NO
G1563	PRJEB38719	ERR4195260	164.7	L4.1.2.1	CL012		31	male	SPAIN	-	CASTELLON	no	no	no	no	no	no	no	positive	positive	pulmonary	initial	2015	2015-07-01	2015-10-14	2015-10-14	YES
G200	PRJEB38719	ERR4195429	140.2	L4.4.1.1	CL013		43	female	ARGENTINA	2000	VALENCIA	yes	no	no	no	no	no	no	negative	positive	pulmonary		2014	2014-03-21	2014-04-05	2014-05-12	NO
G268	PRJEB38719	ERR4195531	97.7	L4.4.1.1	CL013		41	male	SPAIN	-	CASTELLON	no	no	yes	no	yes	no	no	positive	positive	pulmonary	initial	2014	2014-09-01	2014-10-03	2014-10-03	NO
G393m	PRJEB38719	ERR4195313	78.9	L4.4.1.1	CL013	NA	NA	NA	NA	NA	ALICANTE	NA	NA	NA	NA	NA	no	NA	NA	NA	NA	NA	NA	NA	NA	NA	NA
G120	PRJEB38719	ERR4195322	95.4	L4.3.2	CL014		33	male	ECUADOR	2004	VALENCIA	no	no	no	no	no	NA	no	positive	positive	pulmonary	initial	2014	2014-04-05	2014-05-09	2014-05-09	NO
G431m	PRJEB38719	ERR4195557	156.5	L4.3.2	CL014	NA	NA	NA	NA	NA	VALENCIA	NA	NA	NA	NA	NA	no	NA	NA	NA	NA	NA	NA	NA	NA	NA	NA
G435m	PRJEB38719	ERR4195229	125.1	L4.3.2	CL014		25	female	BOLIVIA	2006	VALENCIA	no	no	no	no	no	no	no	positive	positive	pulmonary	initial	2014	2013-10-01	2014-11-27	2014-11-27	YES
G465	PRJEB29604	ERR2884689	104.5	L4.3.4.2	CL015		51	male	SPAIN	-	VALENCIA	yes	no	no	yes	no	no	no	positive	positive	pulmonary	initial	2014	2014-01-15	2014-02-18	2014-02-18	NO
G497m	PRJEB29604	ERR2884690	142.0	L4.3.4.2	CL015		76	female	FRANCE	2004	VALENCIA	no	no	no	yes	no	no	no	negative	positive	extrapulmonary	initial	2014	2013-12-11	2014-05-23	2014-04-24	YES
G500m	PRJEB29604	ERR2884691	159.8	L4.3.4.2	CL015		75	female	SPAIN	-	VALENCIA	no	no	no	no	no	no	no	not done	positive	extrapulmonary	initial	2014	2014-02-17	2014-06-18	2014-04-24	NO
G623m	PRJEB29604	ERR2884700	165.4	L4.10	CL016		43	male	SPAIN	-	VALENCIA	yes	no	no	no	no	yes	no	positive	positive	pulmonary	initial	2014	2014-09-30	2014-10-07	2014-10-07	NO
G778m	PRJEB29604	ERR2884709	129.2	L4.10	CL016		33	male	INDIA	2009	VALENCIA	yes			no	no	no	no	positive	positive	pulmonary	initial	2015	2015-02-15	2015-05-14	2015-05-14	NO
G917	PRJEB29604	ERR2884723	135.0	L4.10	CL016	1876	63	male	SPAIN	-	VALENCIA	no	no	no	no	no	no	no	positive	positive	pulmonary		2015	2015-06-01	2015-06-10	2015-06-11	NO
G1303	PRJEB29604	ERR2884630	143.6	L4.10	CL016		83	male	SPAIN	-	VALENCIA	no	no	no	yes	no	no	no	negative	positive	pulmonary	initial	2015	2015-09-18	2015-11-13	2015-11-11	NO
G1570	PRJEB29604	ERR2884648	106.9	L4.10	CL016	2147	32	male	COLOMBIA	2004	VALENCIA	yes	no	yes	no	no	no	no	positive	positive	pulmonary	initial	2016	2015-11-09	2016-02-09	2016-02-09	YES
G1578	PRJEB29604	ERR2884651	106.3	L4.10	CL016	2147	2022-05-01	male	SPAIN	-	VALENCIA	no	no	no	no	no	no	no	negative	positive	pulmonary	initial	2016	2016-02-10	2016-02-13	2016-02-10	NO
G262	PRJEB38719	ERR4195530	160.3	L4.3.2	CL017	1714	51	male	SPAIN	-	VALENCIA	yes	no	no	no	no	no	no	positive	positive	pulmonary	previous treatment	2014	2014-05-22	2014-10-15	2014-10-15	YES
G641m	PRJEB38719	ERR4195598	138.8	L4.3.2	CL017	1714	14	male	SPAIN	-	VALENCIA	no	no	no	no	no	no	no	negative	positive	pulmonary	initial	2014	2014-10-31	2014-11-01	2014-10-31	NO
G1190	PRJEB38719	ERR4195482	111.1	L4.3.2	CL017		39	male	SPAIN	-	VALENCIA	no	no	no	no	no	no	no	negative	positive	pulmonary	initial	2015	2013-11-26	2015-01-15	2015-01-02	YES
G459m	PRJEB38719	ERR4195422	167.8	L4.10	CL018		84	female	SPAIN	-	VALENCIA	no	no	no		no	no	no	positive	positive	pulmonary	initial	2015	2014-08-04	2015-01-15	2015-01-14	YES
G682	PRJEB38719	ERR4195403	289.5	L4.10	CL018		49	female	SPAIN	-	VALENCIA	no	no	no	no	no	no	yes	negative	positive	pulmonary	initial	2015	2014-12-13		2015-04-16	YES
G1438	PRJEB38719	ERR4195735	123.6	L4.10	CL018		43	female	SPAIN	-	VALENCIA	no	no	no	no	no	NA	yes	negative	positive	extrapulmonary	initial	2015	2015-09-07	2015-10-26	2015-10-26	NO
G990	PRJEB38719	ERR4195647	116.0	L4.3.4.2	CL019	1837	86	male	SPAIN	-	CASTELLON	no	no	no	no	no	no	no	positive	positive	pulmonary	initial	2015	2014-04-04	2015-04-02	2015-04-02	YES
G991	PRJEB38719	ERR4195237	45.1	L4.3.4.2	CL019	1837	94	female	SPAIN	-	CASTELLON	no	no	no	no	no	no	no	negative	positive	pulmonary	initial	2015	2015-04-14	2015-05-26	2015-05-25	NO
G992	PRJEB38719	ERR4195238	59.6	L4.3.4.2	CL019	1837	49	female	SPAIN	-	CASTELLON	no	no	no	no	no	no	no	negative	positive	pulmonary	initial	2015	2015-04-30	2015-06-23	2015-06-22	NO
G1759	PRJEB38719	ERR4195833	171.8	L4.3.4.2	CL019		82	female	SPAIN	-	CASTELLON	no	no	no	no	no	no	no	positive	positive	pulmonary	initial	2016	2016-10-05	2016-11-16	2016-11-10	NO
G19	PRJEB29604	ERR2884675	140.1	L4.1.2.1	CL020	1584	30	male	MOROCCO	2009	CASTELLON	no	no	no	no	no	no	no	positive	positive	pulmonary	initial	2014	2013-11-15	2014-02-03	2014-02-03	NO
G940	PRJEB29604	ERR2884725	185.3	L4.1.2.1	CL020		39	male	MOROCCO	2015	VALENCIA	no	no	no	no	no	no	no	negative	positive	extrapulmonary	initial	2015	2015-04-23	2015-04-30	2015-05-04	NO
G1156	PRJEB29604	ERR2884620	127.6	L4.1.2.1	CL020		40	female	SPAIN	-	CASTELLON	no	no	no	no	no	no	no	negative	positive	pulmonary	initial	2015	2015-05-17	2015-07-29	2015-07-28	NO
G1440	PRJEB29604	ERR2884638	136.0	L4.1.2.1	CL020		42	female	SPAIN	-	VALENCIA	no	no	no	no	no	no	yes	positive	positive	pulmonary	initial	2016	2015-08-20	2016-02-02	2016-02-01	YES
G83	PRJEB38719	ERR4195610	45.9	L4.1.2.1	CL021	1598	49	female	SPAIN	-	ALICANTE	no	no	no	no	no	no	no	negative	positive	pulmonary	initial	2014	2013-12-11	2014-02-26	2014-02-25	NO
G906	PRJEB38719	ERR4195632	67.7	L4.1.2.1	CL021		41	male	RUMANIA	2007	VALENCIA	yes	no	no	no	yes	no	no	positive	positive	pulmonary	initial	2014	2014-01-08	2014-04-07	2014-04-07	NO
G923m	PRJEB38719	ERR4195636	46.6	L4.1.2.1	CL021		48	male	SPAIN	-	ALICANTE	no	no	no	no	no	no	no	positive	positive	pulmonary	initial	2015	2015-02-23	2015-03-11	2015-03-11	NO
G60	PRJEB38719	ERR4195597	139.0	L4.10	CL022		45	male	RUMANIA	2000	VALENCIA	yes	no	no	no	no	no	no	negative	positive	pulmonary	previous treatment	2015		2015-04-30	2015-04-15
G214	PRJEB38719	ERR4195515	94.9	L4.10	CL022		25	female	RUMANIA	2013	ALICANTE	no	no	no	no	no	no	no	positive	positive	extrapulmonary	initial	2014	2014-06-09	2014-06-16	2014-06-16	NO
G1302m	PRJEB38719	ERR4195700	184.9	L4.10	CL022		43	male	RUMANIA	2000	VALENCIA	yes	no	no	yes	no	no	no	positive	positive	pulmonary	initial	2015	2015-06-01	2015-08-29	2015-08-29	NO
G130	PRJEB29604	ERR2884629	48.2	L4.1.2.1	CL023		75	male	SPAIN	-	VALENCIA	no	no	no	no	no	no	no	negative	positive	pulmonary	initial	2014	2014-02-15	2014-06-24	2014-06-22	YES
G552m	PRJEB29604	ERR2884695	120.6	L4.1.2.1	CL023		65	female	SPAIN	-	VALENCIA	no	no	no	no		no	no	positive	positive	pulmonary	initial	2014	2013-09-09	2014-01-16	2013-12-27	YES
G830m	PRJEB29604	ERR2884714	100.2	L4.1.2.1	CL023		48	male	SPAIN	-	VALENCIA	yes	no	no	no	no	NA	no	positive	positive	pulmonary	initial	2015	2014-09-01	2015-04-08	2015-04-08	YES
G1644	PRJEB29604	ERR2884658	112.1	L4.1.2.1	CL023	2270	43	female	SPAIN	-	VALENCIA	no	no	no	no	no	no	no	negative	negative	pulmonary	initial	2016	2016-06-07	2016-07-05	2016-07-04	NO
G24	PRJEB38719	ERR4195522	64.9	L4.4.1.1	CL024		40	female	SPAIN	-	VALENCIA	no	no	no	no	no	no	no	positive	positive	pulmonary	initial	2013	2013-09-05	2013-12-04	2013-12-04	YES
G583m	PRJEB38719	ERR4195461	180.1	L4.4.1.1	CL024		62	male	SPAIN	-	VALENCIA	yes	no	no	no	no	no	no	positive	positive	pulmonary	initial	2014	2014-07-01	2014-11-29	2014-11-28	YES
G1018	PRJEB38719	ERR4195651	107.8	L4.4.1.1	CL024		48	female	SPAIN	-	VALENCIA	no	no	no	no	no	no	no	negative	positive	extrapulmonary	initial	2015	2015-05-05	2015-09-18	2015-09-18	YES
G233	PRJEB38719	ERR4195521	140.9	L4.3.4.2	CL025		47	male	SPAIN	-	VALENCIA	no	no	no	no	no	no	no	positive	positive	pulmonary	initial	2014	2014-06-01	2014-07-16	2014-07-16	NO
G1065	PRJEB38719	ERR4195664	165.9	L4.3.4.2	CL025		42	male	SPAIN	-	VALENCIA	no	no	no	no	no	no	no	positive	positive	pulmonary	initial	2015	2015-03-26	2015-06-26	2015-06-26	YES
G1322	PRJEB38719	ERR4195702	134.7	L4.3.4.2	CL025		39	male	SPAIN	-	VALENCIA	no	no	no	yes	no	NA	no	negative	positive	pulmonary	initial	2014	2014-01-29	2015-12-15	2015-12-09	YES
G125	PRJEB29604	ERR2884626	101.4	L4.1.2.1	CL026		80	female	SPAIN	-	VALENCIA	no	no	no	yes	no	no	no	negative	positive	pulmonary	initial	2014	2014-01-01	2014-01-21	2014-01-21	NO
G147	PRJEB29604	ERR2884643	88.0	L4.1.2.1	CL026		56	male	SPAIN	-	CASTELLON	yes	no	yes	no	no	yes	no	positive	positive	pulmonary	initial	2014	2014-01-01		2014-04-01	YES
G1342	PRJEB29604	ERR2884634	78.8	L4.1.2.1	CL026		44	male	SPAIN	-	ALICANTE	no	no	no	no	no	no	no	positive	positive	pulmonary	initial	2015	2015-09-30	2015-11-02	2015-11-03	NO
G1588	PRJEB29604	ERR2884652	101.7	L4.1.2.1	CL026	NA	NA	NA	NA	NA	VALENCIA	NA	NA	NA	NA	NA	no	NA	NA	NA	NA	NA	NA	NA	NA	NA	NA
G1676	PRJEB29604	ERR2884661	91.0	L4.1.2.1	CL026	NA	NA	NA	NA	NA	VALENCIA	NA	NA	NA	NA	NA	no	NA	NA	NA	NA	NA	NA	NA	NA	NA	NA
G1792	PRJEB29604	ERR2884669	41.5	L4.1.2.1	CL026		39	male	SPAIN	-	VALENCIA	yes	yes	no	yes	yes	no	no	positive	positive	pulmonary	initial	2016	2016-09-01	2016-09-13	2016-09-13	NO
G1829	PRJEB29604	ERR2884671	186.8	L4.1.2.1	CL026		56	female	SPAIN	-	VALENCIA	yes	no	no	no	no	no	no	positive	positive	pulmonary	initial	2016	2016-05-20	2016-06-09	2016-05-25	NO
G1309	PRJEB38719	ERR4195291	261.6	L4.1.1.3	CL027		71	male	SPAIN	-	VALENCIA	no	no	no	no	no	no	no	positive	positive	pulmonary	initial	2015	2015-06-10	2015-10-08	2015-09-30	YES
G1310	PRJEB38719	ERR4195254	211.7	L4.1.1.3	CL027	NA	NA	NA	NA	NA	VALENCIA	NA	NA	NA	NA	NA	no	NA	NA	NA	NA	NA	NA	NA	NA	NA	NA
G1634	PRJEB38719	ERR4195785	97.1	L4.1.1.3	CL027		36	female	SPAIN	-	VALENCIA	no	no	no	no	no	no	no	positive	positive	pulmonary	initial	2016	2016-04-05	2016-04-06	2016-04-06	NO
G1269	PRJEB38719	ERR4195293	88.7	L4.3.2	CL028		30	female	SPAIN	-	VALENCIA	no	no	no	no	no	no	yes	positive	positive	pulmonary	initial	2015	2015-05-01	2015-08-13	2015-08-13	YES
G1355	PRJEB38719	ERR4195714	92.8	L4.3.2	CL028		49	female	SPAIN	-	ALICANTE	no	no	no	no		no	no	positive	positive	pulmonary	initial	2014	2014-09-21	2014-10-03	2014-10-03	NO
G1128	PRJEB38719	ERR4195672	118.6	L4.1.2	CL029	2016	25	female	SPAIN	-	CASTELLON	no	no	yes	no	no	no	no	positive	positive	pulmonary	initial	2015	2015-04-09	2015-05-07	2015-05-07	NO
G1562	PRJEB38719	ERR4195772	150.7	L4.1.2	CL029	2016	48	female	SPAIN	-	CASTELLON	no	no	no	yes	no	no	no	positive	positive	pulmonary	initial	2015	2015-11-02	2015-12-09	2015-12-09	NO
G142	PRJEB38719	ERR4195732	100.5	L4.3.3	CL030		58	male	SPAIN	-	VALENCIA	yes	no	no	no	no	no	no	positive	positive	pulmonary	initial	2014	2013-11-14	2014-02-14	2014-02-14	YES
G250	PRJEB38719	ERR4195306	93.8	L4.3.3	CL030		68	male	SPAIN	-	VALENCIA	no	no	yes	no	no	no	no	negative	positive	extrapulmonary	initial	2014	2014-02-20	2014-06-26	2014-04-29	NO
G271	PRJEB29604	ERR2884684	101.2	L4.1.2.1	CL031		45	male	SPAIN	-	CASTELLON	no	no	no	yes	no	no	no	positive	positive	pulmonary	initial	2014	2014-05-05	2014-11-03	2014-11-03	YES
G1090	PRJEB29604	ERR2884616	137.1	L4.1.2.1	CL031		52	male	SPAIN	-	CASTELLON	yes	yes	yes	no	yes	no	no	positive	positive	pulmonary	previous treatment	2014	2014-10-20	2014-12-18	2014-12-18	NO
G1775	PRJEB29604	ERR2884666	115.0	L4.1.2.1	CL031		25	female	SPAIN	-	CASTELLON	no	no	no	no	no	no	no	positive	positive	pulmonary	initial	2015	2015-09-03	2015-12-05	2015-12-04	YES
G1842	PRJEB29604	ERR2884673	129.9	L4.1.2.1	CL031		17	male	SPAIN	-	CASTELLON	no	no	no	no	no	no	no	negative	positive	pulmonary	initial	2016	2016-10-01	2016-12-01	2016-12-01	NO
G2059	PRJEB29604	ERR2884679	65.9	L4.1.2.1	CL031		20	male	SPAIN	-	CASTELLON	no	no	no	no	no	no	yes	positive	positive	pulmonary	initial	2016	2016-11-08	2016-12-21	2016-12-21	NO
G356m	PRJEB38719	ERR4195544	81.8	L4.1.2.1	CL032		43	male	SPAIN	-	VALENCIA	yes	no	no	no	yes	no	no	positive	positive	pulmonary		2015	2015-10-19	2015-10-20	2015-10-20	NO
G470m	PRJEB38719	ERR4195566	166.7	L4.1.2.1	CL032		31	male	SPAIN	-	VALENCIA	no	no	no	no	no	no	no	positive	positive	pulmonary	initial	2014	2013-12-24	2014-01-24	2014-01-24	NO
G565m	PRJEB38719	ERR4195587	92.4	L4.3.2	CL033		96	male	SPAIN	-	VALENCIA	no	no	no	no	no	no	no	negative	negative	pulmonary	initial	2014	2014-05-26	2014-07-25	2014-07-22	NO
G580m	PRJEB38719	ERR4195460	90.8	L4.3.2	CL033		48	male	SPAIN	-	VALENCIA	no	no	no	no	yes	no	no	positive	positive	pulmonary	previous treatment	2014	2014-05-18	2014-05-30	2014-05-30	NO
G669	PRJEB38719	ERR4195339	73.3	L4.10	CL034		3	male	SPAIN	-	VALENCIA	no	no	no	no	no	no	no	negative	positive	extrapulmonary	initial	2014	2014-10-28	2014-12-12	2014-12-12	NO
G1238FE28	PRJEB38719	ERR4195690	75.0	L4.10	CL034		67	male	RUMANIA	1999	VALENCIA	yes					no		positive	positive	pulmonary	initial	2015	2015-05-10	2015-07-10	2015-07-10	NO
G1537	PRJEB38719	ERR4195766	135.9	L4.10	CL034	2231	17	female	SPAIN	-	VALENCIA	no	no	no	no	no	no	no	positive	positive	pulmonary	initial	2016	2016-01-11	2016-04-25	2016-04-15	YES
G1786	PRJEB38719	ERR4195426	131.5	L4.10	CL034	2231	47	female	SPAIN	-	VALENCIA	no	no	no	no	no	no	no	negative	negative	pulmonary	initial	2016	2016-07-10	2016-08-11	2016-08-10	NO
G782m	PRJEB38719	ERR4195358	101.2	L4.10	CL035		49	male	SPAIN	-	VALENCIA	yes	no	no	no	no	yes	no	positive	positive	pulmonary	previous treatment	2014	2014-11-05	2014-11-28	2014-11-28	NO
G1192	PRJEB38719	ERR4195684	294.1	L4.10	CL035		83	male	SPAIN	-	VALENCIA	no	no	no	no	no	no	no	negative	positive	pulmonary	initial	2014	2014-11-28	2014-12-30	2014-12-30	NO
G630m	PRJEB38719	ERR4195361	93.9	L4.6.2.2	CL036	NA	NA	NA	NA	NA	VALENCIA	NA	NA	NA	NA	NA	no	NA	NA	NA	NA	NA	NA	NA	NA	NA	NA
G810m	PRJEB38719	ERR4195466	38.1	L4.6.2.2	CL036		40	male	CAMEROON	2014	VALENCIA	no	no	yes	no	yes	no	no	positive	positive	pulmonary	initial	2015	2015-01-01	2015-01-28	2015-01-28	NO
G2128	PRJEB38719	ERR4195514	61.1	L4.6.2.2	CL036		25	female	NIGERIA	2010	VALENCIA	no	no	no	no	yes	no	no	positive	positive	pulmonary	initial	2015	2015-02-16	2015-02-17	2015-02-17	NO
G766m	PRJEB38719	ERR4195604	105.6	L4.1.2.1	CL037	1818	60	female	SPAIN	-	VALENCIA	no	no	no	no	no	no	no	positive	positive	pulmonary	initial	2015	2014-12-29	2015-01-28	2015-01-27	NO
G817m	PRJEB38719	ERR4195274	127.3	L4.1.2.1	CL037	1818	48	male	SPAIN	-	VALENCIA	yes	no	no	no	no	no	no	negative	positive	pulmonary		2015	2015-03-03	2015-03-17	2015-03-16	NO
G1513	PRJEB38719	ERR4195756	84.7	L4.1.2.1	CL037	1818	49	male	SPAIN	-	VALENCIA	no	no	no	no	no	yes	no	positive	positive	pulmonary	initial	2016	2015-01-27	2016-02-08	2016-03-30	YES
G1910	PRJEB38719	ERR4195504	177.1	L4.1.2.1	CL037		41	male	SPAIN	-	VALENCIA	no	no	no	yes	no	no	no	negative	positive	pulmonary	previous treatment	2016	2016-12-07	2016-12-20	2016-12-14	NO
G84	PRJEB38719	ERR4195328	69.2	L4.3.3	CL038	1561	45	male	SPAIN	-	ALICANTE	yes	no	no	no	no	no	no	positive	positive	extrapulmonary	initial	2014	2014-01-17	2014-01-23	2014-01-24	NO
G474m	PRJEB38719	ERR4195567	125.3	L4.3.3	CL038	1561	41	male	SPAIN	-	ALICANTE	yes	no	no	no		no	no	positive	positive	pulmonary	initial	2014	2013-08-01	2014-01-28	2014-01-28	YES
G945	PRJEB38719	ERR4195639	129.8	L4.10	CL039	1863	27	female	MOROCCO	2014	VALENCIA	no	no	no	no	no	no	no	positive	positive	pulmonary	initial	2015	2015-05-10	2015-05-31	2015-05-31	NO
G1023	PRJEB38719	ERR4195654	310.3	L4.10	CL039	1863	4	female	SPAIN	-	VALENCIA	no	no	no	no	no	no	no	negative	positive	pulmonary	initial	2015		2015-06-17	2015-06-17
G951	PRJEB38719	ERR4195641	110.5	L4.1.2.1	CL040		39	male	RUMANIA	9999	VALENCIA	yes			no	no	no	no	positive	positive	pulmonary	initial	2015	2015-03-01	2015-04-20	2015-04-20	NO
G958	PRJEB38719	ERR4195284	161.2	L4.1.2.1	CL040		72	male	SPAIN	-	VALENCIA	no	no	no	no	no	no	no	positive	positive	pulmonary	initial	2015	2015-03-24	2015-05-08	2015-05-08	NO
G934	PRJEB38719	ERR4195637	118.0	L4.3.2	CL041		5	male	SPAIN	-	VALENCIA	no	no	no	no	no	no	no	negative	positive	pulmonary	initial	2015	2015-04-20	2015-05-03	2015-04-30	NO
G976	PRJEB38719	ERR4195408	132.5	L4.3.2	CL041		50	male	SPAIN	-	VALENCIA	no	no	no	no	no	no	no	positive	positive	pulmonary	initial	2015	2015-04-07	2015-07-24	2015-07-24	YES
G128	PRJEB38719	ERR4195695	95.7	L4.3.3	CL042	1602	4	male	SPAIN	-	VALENCIA	no	no	no	no	no	no	no	negative	positive	pulmonary	initial	2014	2014-03-10	2014-03-17	2014-03-17	NO
G1258	PRJEB38719	ERR4195691	86.7	L4.3.3	CL042	1602	29	female	SPAIN	-	VALENCIA	no			no		no	no	positive	positive	pulmonary	initial	2014	2014-01-14	2014-03-15	2014-03-14	NO
G1304	PRJEB38719	ERR4195247	108.8	L4.1.2	CL043		59	male	SPAIN	-	VALENCIA	no	no	no	yes	no	no	no	positive	positive	pulmonary	initial	2015	2015-09-10	2015-09-17	2015-09-17	NO
G1305	PRJEB38719	ERR4195290	96.3	L4.1.2	CL043	NA	NA	NA	NA	NA	VALENCIA	NA	NA	NA	NA	NA	no	NA	NA	NA	NA	NA	NA	NA	NA	NA	NA
G1268	PRJEB38719	ERR4195485	164.7	L4.3.2	CL044		39	male	MALI	1997	VALENCIA	no	no	no	no	no	no	no	negative	positive	pulmonary	initial	2015	2015-09-30	2015-10-30	2015-10-30	NO
G1377	PRJEB38719	ERR4195727	209.0	L4.3.2	CL044	NA	NA	NA	NA	NA	VALENCIA	NA	NA	NA	NA	NA	no	NA	NA	NA	NA	NA	NA	NA	NA	NA	NA
G146m	PRJEB29604	ERR2884642	587.2	L4.3.3	CL045		34	male	RUMANIA	2008	CASTELLON	yes	no	no	no	no	no	no	positive	positive	pulmonary	initial	2013	2013-04-26	2013-06-27	2013-06-27	NO
G1141	PRJEB29604	ERR2884619	145.5	L4.3.3	CL045		47	male	RUMANIA	2000	CASTELLON	yes	no	no	no	no	no	no	positive	positive	pulmonary	initial	2015	2015-05-09	2015-06-10	2015-06-10	NO
G1747	PRJEB29604	ERR2884664	117.6	L4.3.3	CL045		56	male	RUMANIA	2002	CASTELLON	yes	no	no	no	no	yes	no	positive	positive	pulmonary	initial	2016	2015-06-01	2016-01-11	2016-01-11	YES
G1761	PRJEB29604	ERR2884665	137.3	L4.3.3	CL045		57	male		2015	CASTELLON	yes	yes		no	no	no	no	positive	positive	pulmonary	initial	2016	2016-09-09	2016-09-16	2016-09-16	NO
G139	PRJEB38719	ERR4195729	91.5	L4.1.2.1	CL046		40	male	ALGERIA	2003	VALENCIA	no	no	no	no	no	no	no	positive	positive	pulmonary		2014	2013-11-22	2014-01-23	2014-01-23	NO
G204	PRJEB38719	ERR4195508	122.0	L4.1.2.1	CL046		38	male	RUMANIA	2014	VALENCIA			no	no	yes	no	no	negative	positive	pulmonary	previous treatment	2014	2014-03-01	2014-06-09	2014-06-09	YES
G228	PRJEB38719	ERR4195520	38.4	L4.1.2.1	CL047		29	female	BOLIVIA	2009	VALENCIA	no	no	no	no	no	no	no	negative	positive	pulmonary	previous treatment	2014	2014-06-02	2014-07-24	2014-07-23	NO
G255	PRJEB38719	ERR4195526	105.3	L4.1.2.1	CL047		2022-08-01	female	SPAIN	-	VALENCIA	no	no	no	no	no	no	no	negative	positive	pulmonary	initial	2014	2014-08-05	2014-09-18	2014-09-17	NO
G216	PRJEB38719	ERR4195246	103.6	L4.1.2.1	CL048		30	male	MALI	2006	VALENCIA	no	no	no	no	yes	yes	no	negative	positive	extrapulmonary	initial	2014	2014-02-20	2014-03-28	2014-04-01	NO
G508m	PRJEB38719	ERR4195574	131.7	L4.1.2.1	CL048		47	male	SPAIN	-	ALICANTE	no	no	no	no	no	no	no	positive	positive	pulmonary	initial	2014	2014-02-04	2014-04-08	2014-04-08	NO
G554	PRJEB38719	ERR4195581	144.9	L4.1.2.1	CL049		42	female	RUMANIA	2007	VALENCIA	no	no	no	no		yes	no	positive	positive	pulmonary	initial	2014	2014-01-02	2014-03-21	2014-03-21	NO
G572	PRJEB38719	ERR4195590	275.3	L4.1.2.1	CL049		32	female	SPAIN	-	VALENCIA	no	no	no	no	no	no	no	positive	positive	pulmonary	initial	2014	2014-10-27	2014-11-05	2014-11-06	NO
G123	PRJEB38719	ERR4195483	250.6	L4.3.3	CL050		38	female	SPAIN	-	VALENCIA	yes	no	no	yes		no	no	positive	positive	pulmonary	initial	2014	2014-04-15	2014-06-19	2014-06-18	NO
G835m	PRJEB38719	ERR4195327	120.9	L4.3.3	CL050		42	male	SPAIN	-	VALENCIA	yes	no	no	no		no	no	positive	positive	pulmonary	initial	2015	2015-04-08	2015-04-17	2015-04-16	NO
G1799	PRJEB38719	ERR4195497	197.6	L4.3.3	CL050		45	male	SPAIN	-	VALENCIA	no	no	no	no	yes	no	no	negative	positive	pulmonary	initial	2016	2016-01-15	2016-09-28	2016-09-28	YES
G25	PRJEB38719	ERR4195311	75.8	L4.3.2	CL051	1573	41	male	MOROCCO	2000	VALENCIA	yes	no	no	no	no	no	no	positive	positive	pulmonary	initial	2014	2013-09-26	2014-01-27	2014-01-27	YES
G1431	PRJEB38719	ERR4195490	124.6	L4.3.2	CL051		41	male	MOROCCO	1999	VALENCIA	no	no	no	no	no	no	no	positive	positive	pulmonary	initial	2015	2015-07-27	2015-10-27	2015-10-27	YES
G177m	PRJEB38719	ERR4195418	120.8	L6	CL052		48	male	SPAIN	-	CASTELLON	no	yes	no	no	no	no	no	negative	positive	pulmonary	initial	2014	2013-06-01	2014-05-29	2014-05-29	YES
G318	PRJEB38719	ERR4195221	71.7	L6	CL052	NA	NA	NA	NA	NA	CASTELLON	NA	NA	NA	NA	NA	no	NA	NA	NA	NA	NA	NA	NA	NA	NA	NA
G247	PRJEB38719	ERR4195525	122.6	L4.1.2.1	CL053		44	male	HUNGARY	1999	VALENCIA	no	no	no	no	no	no	no	negative	positive	pulmonary	initial	2013	2012-12-09	2013-12-11	2013-12-09	YES
G654m	PRJEB38719	ERR4195601	160.4	L4.1.2.1	CL053		20	female	SPAIN	-	VALENCIA	no	no	no	no	no	no	no	positive	positive	pulmonary	initial	2014	2014-12-10	2014-12-23	2014-12-23	NO
G377	PRJEB38719	ERR4195546	95.9	L4.1.2.1	CL054		29	female	SPAIN	-	VALENCIA	no	no	no	no	no	no	no	positive	positive	pulmonary	initial	2014	2014-05-15	2014-06-18	2014-06-16	NO
G883	PRJEB38719	ERR4195625	128.9	L4.1.2.1	CL054		34	male	SPAIN	-	VALENCIA	no	no	no	no	no	no	yes	positive	positive	extrapulmonary	initial	2015	2015-01-09	2015-04-16	2015-04-09	YES
G982	PRJEB38719	ERR4195643	78.8	L4.1.2.1	CL055		48	male	SPAIN	-	ALICANTE	no		no	no	no	no	no	positive	positive	pulmonary	initial	2015	2015-06-10	2015-07-30	2015-07-29	NO
G1061	PRJEB38719	ERR4195661	269.7	L4.1.2.1	CL055		23	female	SPAIN	-	ALICANTE	no	no	no	no	no	no	no	negative	negative	extrapulmonary	initial	2015	2015-06-06	2015-07-02	2015-06-30	NO
G1616	PRJEB38719	ERR4195396	128.0	L4.1.2.1	CL055	2233	40	male	SPAIN	-	ALICANTE	no	no		no	no	no		negative	positive	pulmonary	initial	2016	2016-07-06	2016-08-03	2016-08-03	NO
G1360	PRJEB38719	ERR4195427	95.2	L4.3.4.2	CL056	2070	28	male	SPAIN	-	ALICANTE	no	no	no	no	no	no	no	positive	positive	pulmonary	initial	2015	2015-08-29	2015-12-29	2015-12-29	YES
G1420	PRJEB38719	ERR4195261	98.5	L4.3.4.2	CL056	2070	29	male	SPAIN	-	ALICANTE	no	no	no	no	no	no	no	negative	positive	pulmonary	initial	2016	2016-02-08	2016-02-09	2016-02-09	NO
G89	PRJEB38719	ERR4195630	72.1	L4.3.4.2	CL057		57	female	UK	2008	ALICANTE	yes	no	no	no	no	no	no	positive	positive	pulmonary	initial	2013	2013-05-12	2013-11-13	2013-11-13	YES
G395m	PRJEB38719	ERR4195547	125.2	L4.3.4.2	CL057		49	male	SPAIN	-	ALICANTE	no	no	no	no	no	no	no	negative	positive	extrapulmonary	initial	2014	2014-01-30	2014-03-24	2014-03-25	NO
G1199	PRJEB38719	ERR4195686	115.6	L4.1.2.1	CL058	1891	26	female	SPAIN	-	VALENCIA	no	no	no	no	no	no	no	positive	positive	pulmonary	initial	2015	2015-05-20	2015-06-13	2015-06-12	NO
G1200	PRJEB38719	ERR4195228	120.4	L4.1.2.1	CL058	1891	39	male	SPAIN	-	VALENCIA	no	no	no	no	no	no	no	positive	positive	pulmonary	initial	2015	2015-03-23	2015-06-24	2015-06-22	YES
G302m	PRJEB38719	ERR4195535	165.6	L4.1.2.1	CL059		40	male	RUMANIA	2005	CASTELLON	no	no	no	no	no	no	no	positive	positive	pulmonary	initial	2014	2014-04-01	2014-10-07	2014-10-07	YES
G1154	PRJEB38719	ERR4195676	236.4	L4.1.2.1	CL059		36	female	SPAIN	-	CASTELLON	no	no	no	no	no	no	no	negative	positive	extrapulmonary	initial	2015	2015-06-03	2015-06-23	2015-06-23	NO
G675	PRJEB38719	ERR4195267	138.8	L4.3.3	CL060	1804	26	female	SPAIN	-	VALENCIA	no	no	no	no	no	no	no	negative	positive	pulmonary	initial	2015	2014-11-29	2015-02-05	2014-12-23	NO
G832m	PRJEB38719	ERR4195242	166.8	L4.3.3	CL060	1804	59	male	MOROCCO	1996	VALENCIA	yes	no	no	no	no	no	no	positive	positive	pulmonary	previous treatment	2015	2015-02-02	2015-03-18	2015-03-17	NO
G1107	PRJEB38719	ERR4195332	122.5	L4.3.2	CL061		62	male	SPAIN	-	CASTELLON	yes	no	yes	yes	no	no	no	positive	positive	pulmonary	initial	2015	2014-08-05	2015-03-02	2015-03-02	YES
G1274	PRJEB38719	ERR4195693	56.4	L4.3.2	CL061		40	male	MOROCCO	2005	ALICANTE	no	no	no	no		no	no	positive	positive	pulmonary	initial	2015	2015-07-10	2015-07-15	2015-07-15	NO
G176	PRJEB38719	ERR4195241	67.5	L4.1.2.1	CL062		23	female		9999	CASTELLON	no	no	no	no	no	no	no	positive	not done	pulmonary	initial	2014	2014-05-01	2014-05-11	2014-05-08	NO
G1105m	PRJEB38719	ERR4195477	99.5	L4.1.2.1	CL062		20	male	LITHUANIA	2007	CASTELLON	no	no	no	no	no	no	no	positive	positive	pulmonary	initial	2015	2015-02-20	2015-03-23	2015-03-23	NO
G1772	PRJEB38719	ERR4195437	68.5	L4.1.2.1	CL062		44	female	RUMANIA	2016	CASTELLON	no	no	no	no	no	no	no	positive	positive	pulmonary	previous treatment	2016	2016-08-01	2016-09-19	2016-09-12	NO
G152	PRJEB38719	ERR4195364	164.3	L4.10	CL063		75	male	SPAIN	-	CASTELLON	no	no	no	no	no	no	no	negative	positive	pulmonary	initial	2014	2012-02-15	2014-05-26	2014-05-22	YES
G314m	PRJEB38719	ERR4195536	97.5	L4.10	CL063		49	male	SPAIN	-	CASTELLON	no	no	yes	no	no	no	no	positive	positive	pulmonary	initial	2014	2014-09-29	2014-10-30	2014-10-30	NO
G1946	PRJEB38719	ERR4195872	363.7	L4.10	CL063		45	male	SPAIN	-	VALENCIA	no	no	no	no	yes	no	no	positive	positive	extrapulmonary	initial	2016	2016-10-05	2016-10-31	2016-10-31	NO
G1316	PRJEB38719	ERR4195701	181.9	L4.1.2.1	CL064		46	male	BOLIVIA	2006	VALENCIA	no	no	no	no		no	no	negative	positive	pulmonary	initial	2015	2015-10-08	2015-11-25	2015-10-15	NO
G1318	PRJEB38719	ERR4195337	121.3	L4.1.2.1	CL064	NA	NA	NA	NA	NA	VALENCIA	NA	NA	NA	NA	NA	no	NA	NA	NA	NA	NA	NA	NA	NA	NA	NA
G665	PRJEB38719	ERR4195602	85.0	L4.3.2	CL065		65	male	SPAIN	-	VALENCIA	yes	no	no	no	no	no	no	negative	positive	pulmonary	initial	2015	2015-01-14	2015-03-31	2015-03-30	NO
G684m	PRJEB38719	ERR4195235	132.3	L4.3.2	CL065		42	female	SPAIN	-	VALENCIA	no	no	no	no	no	no	no	negative	positive	pulmonary	initial	2015	2014-10-14	2015-02-24	2015-02-24	YES
G242	PRJEB38719	ERR4195248	119.0	L4.3.2	CL066		52	male	SPAIN	-	ALICANTE	no	no	no	yes	no	no	no	positive	positive	pulmonary	initial	2014	2014-05-12	2014-07-14	2014-07-14	NO
G467m	PRJEB38719	ERR4195564	93.8	L4.3.2	CL066		74	female	SPAIN	-	ALICANTE	no	no	no	no	no	no	no	negative	positive	extrapulmonary	initial	2014	2014-07-06		2014-09-05	NO
G1000	PRJEB38719	ERR4195472	185.8	L4.1.2.1	CL067	NA	NA	NA	NA	NA	VALENCIA	NA	NA	NA	NA	NA	no	NA	NA	NA	NA	NA	NA	NA	NA	NA	NA
G1012	PRJEB38719	ERR4195650	137.6	L4.1.2.1	CL067		39	male	SPAIN	-	VALENCIA	no		no	no	yes	yes	no	positive	positive	pulmonary	initial	2015	2015-04-15	2015-05-04	2015-05-04	NO
G164	PRJEB38719	ERR4195421	96.7	L4.10	CL068	1664	41	male	MOROCCO	2000	CASTELLON	no	no	yes	yes	no	yes	no	positive	positive	pulmonary	initial	2014	2014-06-05	2014-06-11	2014-06-11	NO
G168	PRJEB38719	ERR4195800	131.1	L4.10	CL068	1664	31	male	SPAIN	-	CASTELLON	yes	no	yes	no	no	no	no	negative	positive	pulmonary	initial	2014		2014-07-15	2014-07-14
G1958	PRJEB38719	ERR4195453	124.8	L4.10	CL068		30	male	SPAIN	-	ALICANTE	no	no	no	no	no	no	no	negative	positive	pulmonary	initial	2016	2016-11-22		2016-12-30	NO
G538m	PRJEB29604	ERR2884693	136.0	L4.3.4.2	CL069		58	male	SPAIN	-	VALENCIA	no	no	no	yes	no	no	no	positive	positive	pulmonary	initial	2014	2014-10-15	2014-11-04	2014-11-04	NO
G848m	PRJEB29604	ERR2884717	136.4	L4.3.4.2	CL069		55	male	SPAIN	-	VALENCIA	no	no	no	no	no	no	no	positive	positive	pulmonary	initial	2015	2015-01-09	2015-03-10	2015-03-10	NO
G1648	PRJEB29604	ERR2884659	71.4	L4.3.4.2	CL069	2191	3	male	SPAIN	-	VALENCIA	no	no	no	no	no	no	no	negative	positive	pulmonary	initial	2016		2016-07-10	2016-07-08
G1653	PRJEB29604	ERR2884660	80.0	L4.3.4.2	CL069	2191	34	female	SPAIN	-	VALENCIA	no	no	no	no	no	no	no	positive	positive	pulmonary	initial	2016	2016-05-20	2016-07-06	2016-07-06	NO
G1785	PRJEB29604	ERR2884667	163.5	L4.3.4.2	CL069	2191	27	male	SPAIN	-	VALENCIA	no	no	no	no	no	no	no	negative	positive	pulmonary	initial	2016	2016-07-17	2016-08-17	2016-08-17	NO
G307m	PRJEB38719	ERR4195324	92.5	L4.10	CL070		53	male	SPAIN	-	CASTELLON	no	no	yes	no	no	no	no	negative	positive	pulmonary	initial	2014	2014-05-21	2014-08-25	2014-08-25	YES
G308m	PRJEB38719	ERR4195348	132.0	L4.10	CL070		34	female	SPAIN	-	CASTELLON	no	no	no	no	no	no	no	positive	positive	extrapulmonary	initial	2014	2014-02-20	2014-08-27	2014-08-27	YES
G1745	PRJEB38719	ERR4195828	32.3	L4.10	CL070		40	male	SPAIN	-	CASTELLON	no	no	no	no	no	no	no	negative	positive	pulmonary	initial	2016	2016-01-10	2016-03-03	2016-03-03	NO
G144	PRJEB38719	ERR4195417	71.9	L4.1.2.1	CL071		46	male	SPAIN	-	CASTELLON	no	no	no	no	no	no	no	positive	positive	pulmonary	initial	2014	2014-01-14	2014-03-17	2014-03-17	NO
G287	PRJEB38719	ERR4195533	138.5	L4.1.2.1	CL071		26	male	RUMANIA	2014	CASTELLON	no	no	no	no	no	no	no	positive	positive	pulmonary	initial	2014	2014-09-14	2014-09-22	2014-09-22	NO
G545m	PRJEB29604	ERR2884694	168.0	L4.10	CL072		45	male	RUMANIA	2003	VALENCIA	no	no	no	no	no	no	no	negative	positive	extrapulmonary	initial	2013	2013-09-24	2013-10-16	2013-10-16	NO
G1058	PRJEB29604	ERR2884614	144.1	L4.10	CL072		67	female	RUMANIA	2000	CASTELLON	no	no	no	no	no	no	no	not done	positive	extrapulmonary	initial	2015	2015-03-15	2015-07-17	2015-07-16	YES
G1544	PRJEB29604	ERR2884646	206.5	L4.10	CL072	2144	49	male	RUMANIA	2006	VALENCIA	no	yes	no	no		no	no	positive	positive	pulmonary	initial	2016	2016-03-07	2016-04-27	2016-04-26	NO
G1630	PRJEB29604	ERR2884657	86.7	L4.10	CL072	2144	9	male	RUMANIA	2015	VALENCIA	no	no	no	no	no	NA	no	negative	positive	pulmonary	initial	2016	2016-04-18	2016-05-02	2016-04-30	NO
G1701	PRJEB29604	ERR2884662	71.4	L4.10	CL072		17	male	SPAIN	-	VALENCIA	no	no	no	no	no	no	no	positive	positive	pulmonary	initial	2016	2016-06-01	2016-07-15	2016-07-15	NO
G560	PRJEB38719	ERR4195584	162.6	L4.1.2.1	CL074		61	female	SPAIN	-	VALENCIA	no	no	no	no	no	no	no	negative	positive	pulmonary	initial	2014	2013-11-16	2014-01-27	2014-01-20	NO
G1421	PRJEB38719	ERR4195319	49.3	L4.1.2.1	CL074	2104	35	female	SPAIN	-	VALENCIA	yes	no	no	no	no	no	no	positive	positive	extrapulmonary	initial	2016	2015-09-20	2016-02-25	2016-02-23	YES
G78	PRJEB29604	ERR2884710	183.1	L4.10	CL077		64	female	SPAIN	-	ALICANTE	yes	no	no	no	no	no	no	negative	positive	pulmonary	initial	2014	2014-01-16	2014-02-17	2014-02-17	NO
G733	PRJEB29604	ERR2884705	148.8	L4.10	CL077		43	male	SPAIN	-	VALENCIA	no		no	no	no	no	no	positive	positive	pulmonary	initial	2015	2015-03-02	2015-03-06	2015-03-06	NO
G1889	PRJEB29604	ERR2884674	106.4	L4.10	CL077	NA	NA	NA	NA	NA	VALENCIA	NA	NA	NA	NA	NA	no	NA	NA	NA	NA	NA	NA	NA	NA	NA	NA
G1939	PRJEB29604	ERR2884676	104.9	L4.10	CL077		58	male	USA	2009	VALENCIA	yes	no	no	no	no	no	no	negative	positive	pulmonary		2016	2016-10-11	2016-12-20	2016-12-20	NO
G871m	PRJEB29604	ERR2884719	151.0	L4	CL078		43	male	RUMANIA	2004	ALICANTE	yes	no	no	no	no	no	no	positive	positive	pulmonary	initial	2015	2015-01-05	2015-01-28	2015-01-28	NO
G1494	PRJEB29604	ERR2884644	134.7	L4	CL078	2116	19	female	PAKISTAN	2009	ALICANTE	no	no	no	no	no	no	no	positive	positive	pulmonary	initial	2016	2016-01-01	2016-03-10	2016-03-10	NO
G1495	PRJEB29604	ERR2884645	134.7	L4	CL078	2116	17	female	PAKISTAN	2009	ALICANTE	no	no	no	no	no	no	no	positive	positive	pulmonary	initial	2016		2016-04-05	2016-04-05
G1621	PRJEB29604	ERR2884656	91.9	L4	CL078	2208	2	female	SPAIN	-	ALICANTE	no	no	no	no	no	no	no	negative	positive	pulmonary	initial	2016	2016-06-19	2016-07-18	2016-07-15	NO
G589	PRJEB38719	ERR4195595	65.9	L4.1.2.1	CL079		25	female	RUMANIA	2005	VALENCIA	no	no	no	no	no	no	no	positive	positive	pulmonary	initial	2015	2014-12-01	2015-03-03	2015-03-03	YES
G1752	PRJEB38719	ERR4195830	39.4	L4.1.2.1	CL079	2202	4	female	SPAIN	-	CASTELLON	no	no	no	no	no	no	no	negative	positive	pulmonary	initial	2016	2016-07-11	2016-07-14	2016-07-15	NO
G768m	PRJEB38719	ERR4195276	127.5	L4.10	CL081	1861	45	female	SPAIN	-	VALENCIA	yes		no	no		no	no	positive	positive	pulmonary		2015	2015-04-01	2015-04-26	2015-04-26	NO
G1518	PRJEB38719	ERR4195379	88.1	L4.10	CL081		48	male	SPAIN	-	VALENCIA	yes	no	no	no	no	no	no	positive	positive	pulmonary	initial	2016	2015-12-25	2016-02-25	2016-02-23	NO
G1849m	PRJEB38719	ERR4195858	191.2	L4.10	CL081	NA	NA	NA	NA	NA	VALENCIA	NA	NA	NA	NA	NA	no	NA	NA	NA	NA	NA	NA	NA	NA	NA	NA
G627m	PRJEB38719	ERR4195245	166.6	L4.10	CL082		38	male	SPAIN	-	VALENCIA	yes		no	no	no	no	no	positive	positive	pulmonary	initial	2015	2015-02-05	2015-02-20	2015-02-20	NO
G1661	PRJEB38719	ERR4195792	235.8	L4.10	CL082	2189	31	female	SPAIN	-	VALENCIA	no	no	no	no	no	no	no	negative	positive	pulmonary	initial	2016	2016-06-24	2016-06-27	2016-06-24	NO
G1693	PRJEB38719	ERR4195805	89.9	L4.10	CL082	2189	34	female	SPAIN	-	VALENCIA	no	no	no	no		no	no	positive	positive	pulmonary	initial	2016	2016-01-10	2016-05-30	2016-05-30	YES
G1519	PRJEB38719	ERR4195359	37.9	L4.3.2	CL083		37	male	SPAIN	-	VALENCIA	no	no	no	no	no	no	no	positive	positive	pulmonary	initial	2016	2016-02-08	2016-03-04	2016-03-04	NO
G1613	PRJEB38719	ERR4195783	118.6	L4.3.2	CL083		37	male	SPAIN	-	ALICANTE	no	no	no	no	no	no	no	negative	positive	pulmonary	initial	2016	2016-05-14	2016-06-09	2016-06-10	NO
G1647	PRJEB38719	ERR4195787	194.3	L4.3.2	CL083	2204	39	female	RUMANIA	2013	ALICANTE	no	no	no	no	no	no	no	negative	positive	pulmonary	initial	2016	2016-03-07	2016-03-26	2016-06-07	YES
G322m	PRJEB38719	ERR4195538	138.5	L4.3.3	CL084		62	male	SPAIN	-	VALENCIA	no	no	no	no	no	no	no	positive	positive	pulmonary	initial	2014	2014-07-16	2014-08-12	2014-08-12	NO
G1587	PRJEB38719	ERR4195779	130.9	L4.3.3	CL084	NA	NA	NA	NA	NA	VALENCIA	NA	NA	NA	NA	NA	no	NA	NA	NA	NA	NA	NA	NA	NA	NA	NA
G1708	PRJEB38719	ERR4195813	227.0	L4.3.3	CL084		30	male	SPAIN	-	VALENCIA	no	no	no	no		no	no	positive	positive	pulmonary	initial	2016	2016-05-09	2016-05-20	2016-05-19	NO
G334	PRJEB38719	ERR4195539	83.7	L4.10	CL085		38	male	SPAIN	-	VALENCIA	yes	no	no	no	no	no	no	positive	positive	pulmonary		2014	2014-08-24	2014-09-10	2014-09-10	NO
G1948	PRJEB38719	ERR4195336	120.4	L4.10	CL085		62	male	SPAIN	-	VALENCIA	no	no	no	no	no	no	no	negative	positive	pulmonary	initial	2016	2016-10-19	2016-11-04	2016-10-31	NO
G1960	PRJEB38719	ERR4195506	40.0	L4.10	CL085	NA	NA	NA	NA	NA	VALENCIA	NA	NA	NA	NA	NA	no	NA	NA	NA	NA	NA	NA	NA	NA	NA	NA
G1461	PRJEB38719	ERR4195739	76.5	L4.10	CL086		26	male	SPAIN	-	VALENCIA	no	yes	yes	no	yes	no	no	positive	positive	pulmonary	initial	2016	2015-12-01	2016-01-11	2016-01-11	NO
G1585	PRJEB38719	ERR4195778	175.2	L4.10	CL086	NA	NA	NA	NA	NA	VALENCIA	NA	NA	NA	NA	NA	no	NA	NA	NA	NA	NA	NA	NA	NA	NA	NA
G1715	PRJEB38719	ERR4195815	69.2	L4.10	CL086	NA	NA	NA	NA	NA	VALENCIA	NA	NA	NA	NA	NA	no	NA	NA	NA	NA	NA	NA	NA	NA	NA	NA
G980	PRJEB38719	ERR4195642	60.5	L4.1.2.1	CL087		28	female	SPAIN	-	VALENCIA	no	no	no	no	no	no	no	positive	positive	pulmonary	initial	2015	2015-07-27	2015-08-07	2015-08-07	NO
G1533	PRJEB38719	ERR4195765	124.1	L4.1.2.1	CL087		41	male	SPAIN	-	VALENCIA	yes	no	yes	yes		no	no	positive	positive	pulmonary	initial	2016	2016-01-11	2016-04-08	2016-04-08	NO
G1627	PRJEB38719	ERR4195439	148.3	L4.1.2.1	CL087	2239	39	male	SPAIN	-	VALENCIA	yes	no	no	no	no	no	no	positive	positive	pulmonary	initial	2016	2016-04-13	2016-05-14	2016-05-17	NO
G1517	PRJEB38719	ERR4195757	97.9	L4.4.1.2	CL088	NA	NA	NA	NA	NA	VALENCIA	NA	NA	NA	NA	NA	no	NA	NA	NA	NA	NA	NA	NA	NA	NA	NA
G1525	PRJEB38719	ERR4195392	106.0	L4.4.1.2	CL088		23	male	COLOMBIA	2003	VALENCIA	no	no	no	no	no	no	no	positive	positive	pulmonary	initial	2016	2016-01-11	2016-02-25	2016-02-18	NO
G1635	PRJEB38719	ERR4195256	97.5	L4.4.1.2	CL088		69	male	SPAIN	-	VALENCIA	yes	no	no	no	no	no	no	negative	positive	pulmonary	initial	2016	2016-04-22	2016-06-29	2016-06-14	NO
G1507	PRJEB38719	ERR4195445	82.9	L4.2.1	CL089	2054	46	female	SPAIN	-	VALENCIA	no	no	no	no	no	no	no	positive	positive	pulmonary	initial	2016	2015-11-25	2016-01-03	2016-01-03	NO
G1791	PRJEB38719	ERR4195496	238.0	L4.2.1	CL089		82	male	SPAIN	-	VALENCIA	no	no	no	no	no	no	no	negative	positive	extrapulmonary	initial	2016	2016-07-31	2016-08-26	2016-08-26	NO
G1803	PRJEB38719	ERR4195845	193.2	L4.2.1	CL089	2268	44	male	RUMANIA	2007	VALENCIA	no	no	no	no	no	no	no	negative	positive	pulmonary	initial	2016	2016-09-09	2016-09-26	2016-09-26	NO
G924	PRJEB38719	ERR4195244	135.1	L4.10	CL090		54	male	SPAIN	-	ALICANTE	yes	no	no	no	no	yes	no	positive	positive	pulmonary	initial	2015	2015-03-03	2015-07-01	2015-07-01	YES
G1476	PRJEB38719	ERR4195745	186.9	L4.10	CL090	NA	NA	NA	NA	NA	ALICANTE	NA	NA	NA	NA	NA	no	NA	NA	NA	NA	NA	NA	NA	NA	NA	NA
G1617	PRJEB38719	ERR4195317	114.1	L4.10	CL090		76	male	SPAIN	-	ALICANTE	no	no	no	yes	no	no	no	positive	positive	pulmonary	initial	2016	2016-07-13	2016-08-08	2016-08-08	NO
G1604	PRJEB38719	ERR4195368	90.5	L4.10	CL091	2541	30	male	SPAIN	-	VALENCIA	no	no	no	no	no	no	no	positive	positive	pulmonary		2016	2016-05-01	2016-05-04	2016-05-04	NO
G1704	PRJEB38719	ERR4195811	108.7	L4.10	CL091		43	male	SPAIN	-	VALENCIA	yes	no	no	no	no	no	no	negative	positive	extrapulmonary	initial	2016	2016-07-10	2016-08-25	2016-08-25	NO
G1821	PRJEB38719	ERR4195499	140.3	L4.10	CL091		24	female	PAKISTAN	2014	VALENCIA	no	no	no	no	no	no	no	negative	positive	extrapulmonary	initial	2016	2016-10-28	2016-11-01	2016-10-28	NO
G1524	PRJEB38719	ERR4195761	107.1	L4.3.3	CL092		46	female	COLOMBIA	2010	VALENCIA	no	no	no	no	no	no	no	positive	positive	pulmonary	initial	2016	2016-02-03	2016-03-11	2016-03-11	NO
G1576	PRJEB38719	ERR4195773	90.2	L4.3.3	CL092		30	female	BOLIVIA	2006	VALENCIA	no	no	no	no	no	no	no	negative	positive	extrapulmonary	initial	2016	2016-03-30	2016-04-07	2016-04-07	NO
G1805	PRJEB38719	ERR4195384	137.8	L4.3.3	CL092		45	female	BOLIVIA	2008	VALENCIA	no	no	no	no	no	no	no	positive	positive	pulmonary	initial	2016	2016-01-01	2016-11-17	2016-11-16	YES
G1351	PRJEB38719	ERR4195488	115.3	L4.10	CL093	NA	NA	NA	NA	NA	ALICANTE	NA	NA	NA	NA	NA	no	NA	NA	NA	NA	NA	NA	NA	NA	NA	NA
G1615m	PRJEB38719	ERR4195784	249.8	L4.10	CL093		52	female	SPAIN	-	ALICANTE	no	no	no	no	no	no	no	negative	positive	pulmonary	initial	2016	2016-06-13	2016-07-05	2016-07-05	NO
G1967	PRJEB38719	ERR4195873	94.1	L4.10	CL093	2233	43	male	SPAIN	-	ALICANTE	yes		no			no	no	negative	positive	pulmonary	initial	2016		2016-09-01	2016-08-08
G878	PRJEB38719	ERR4195623	193.3	L4.3.2	CL098		67	male	SPAIN	-	ALICANTE	no	no	no	no	no	no	no	positive	positive	pulmonary	initial	2015	2015-05-25	2015-06-03	2015-06-03	NO
G1619	PRJEB38719	ERR4195397	127.5	L4.3.2	CL098		26	male	MOROCCO	2003	ALICANTE	no	no	no	no	no	no	no	positive	positive	pulmonary	initial	2016	2016-01-04	2016-05-12	2016-05-10	YES
G1835	PRJEB38719	ERR4195855	79.8	L4.3.2	CL099	2262	40	female	SPAIN	-	VALENCIA	no	no	no	no	no	no	no	negative	positive	pulmonary	initial	2016	2016-07-27	2016-09-09	2016-09-06	NO
G1851	PRJEB38719	ERR4195859	176.6	L4.3.2	CL099		33	male	SPAIN	-	VALENCIA	no	no	no	no	no	no	no	negative	positive	pulmonary	initial	2016	2015-12-02	2016-05-03	2016-05-03	YES
G681m	PRJEB38719	ERR4195462	116.9	L4.1.2.1	CL100		54	male	SPAIN	-	VALENCIA	yes		no	no	no	no	no	positive	positive	pulmonary	initial	2015	2015-01-02	2015-02-06	2015-02-06	NO
G1481	PRJEB38719	ERR4195387	110.3	L4.1.2.1	CL100		75	male	CHILE	1985	VALENCIA	no	no	no	no	no	no	no	negative	positive	extrapulmonary		2016	2016-01-16	2016-01-18	2016-01-18	NO
G862m	PRJEB38719	ERR4195616	63.5	L2.2.1	CL101		25	female	SPAIN	-	VALENCIA	no	no	no	yes	no	no	no	positive	positive	pulmonary	initial	2015	2015-03-29	2015-04-18	2015-04-18	NO
G1464	PRJEB38719	ERR4195373	111.9	L2.2.1	CL101	2303	52	female	UKRAINE	2008	VALENCIA	no	no	no	no	no	no	no	positive	positive	pulmonary	initial	2016	2015-12-05	2016-03-07	2016-03-06	YES
G975	PRJEB38719	ERR4195471	172.2	L4.3.4.2	CL102		54	male	SPAIN	-	ALICANTE	yes	no	no	yes	no	no	no	positive	positive	pulmonary	initial	2015		2015-07-09	2015-07-09
G1543	PRJEB38719	ERR4195769	101.2	L4.3.4.2	CL102		68	male	SPAIN	-	ALICANTE	no	no	no	no	no	no	no	negative	positive	pulmonary	initial	2016	2016-04-01	2016-06-08	2016-04-28	NO
G1332	PRJEB38719	ERR4195707	152.5	L4.1.2.1	CL103		61	female	UK	2008	VALENCIA		no	no	no	no	no	no	positive	positive	pulmonary	initial	2015	2015-06-01	2015-10-05	2015-10-05	YES
G1925	PRJEB38719	ERR4195865	98.5	L4.1.2.1	CL103	2346	1.33	female	SPAIN	-	VALENCIA	no	no	no	no	no	no	no	negative	positive	pulmonary	initial	2016	2016-12-06	2016-12-19	2016-12-19	NO
G192	PRJEB38719	ERR4195864	110.7	L4.1.2.1	CL104		43	female	SPAIN	-	VALENCIA	no	yes	no	no	yes	no	no	positive	positive	pulmonary	initial	2014	2014-03-07	2014-04-15	2014-04-15	NO
G1484m	PRJEB38719	ERR4195405	102.9	L4.1.2.1	CL104	NA	NA	NA	NA	NA	VALENCIA	NA	NA	NA	NA	NA	no	NA	NA	NA	NA	NA	NA	NA	NA	NA	NA
G94	PRJEB38719	ERR4195638	40.5	L4.3.2	CL105		65	male	SPAIN	-	ALICANTE	no	no	no	yes	no	no	no	negative	positive	pulmonary	initial	2014	2014-01-02	2014-01-17	2014-01-17	NO
G1469	PRJEB38719	ERR4195742	80.6	L4.3.2	CL105		40	male	SPAIN	-	ALICANTE	no	no	no	no	no	no	no	positive	positive	pulmonary	initial	2016	2015-11-03	2016-03-02	2016-03-01	YES
G1439	PRJEB38719	ERR4195236	137.8	L4.1.2.1	CL106		43	male	RUMANIA	2012	VALENCIA		no	no	no	no	no	no	positive	positive	pulmonary	previous treatment	2016	2015-12-13	2016-02-13	2016-02-15	NO
G1778	PRJEB38719	ERR4195841	193.1	L4.1.2.1	CL106		27	female	MOROCCO	2001	VALENCIA	no	no	no	no	no	no	no	positive	positive	extrapulmonary	initial	2016	2016-05-20	2016-06-21	2016-06-21	NO
G439m	PRJEB38719	ERR4195230	139.0	L4.3.4.1	CL107		34	male	SPAIN	-	VALENCIA	yes	no	no	no	no	no	no	positive	positive	pulmonary	initial	2015	2014-12-02	2014-12-30	2014-12-30	NO
G1638	PRJEB38719	ERR4195786	103.7	L4.3.4.1	CL107		42	male	SPAIN	-	VALENCIA	no	no	no	no	no	no	no	positive	positive	pulmonary	initial	2016	2016-06-08	2014-06-14	2016-06-14	NO
G454m	PRJEB38719	ERR4195563	177.4	L4.3.1	CL108	NA	NA	NA	NA	NA	VALENCIA	NA	NA	NA	NA	NA	no	NA	NA	NA	NA	NA	NA	NA	NA	NA	NA
G1636	PRJEB38719	ERR4195381	101.4	L4.3.1	CL108		65	male	BOLIVIA	2005	VALENCIA	no	no	no	yes		no	no	positive	positive	pulmonary	initial	2016	2016-06-03	2016-06-11	2016-06-11	NO
G984	PRJEB38719	ERR4195644	121.2	L4.10	CL109		31	female	SPAIN	-	ALICANTE	yes	no	no	no		no	no	negative	positive	pulmonary	initial	2015	2015-07-05	2015-07-18	2015-07-17	NO
G1784	PRJEB38719	ERR4195842	244.9	L4.10	CL109		58	male	SPAIN	-	ALICANTE	yes	no	no	no	no	no	no	positive	positive	pulmonary	initial	2016	2016-08-04	2016-09-05	2016-09-05	NO
G1359	PRJEB38719	ERR4195717	122.2	L4.10	CL110	2046	62	female	SPAIN	-	ALICANTE	no	no	no	yes	no	no	no	positive	positive	pulmonary	initial	2016	2015-12-23	2016-01-01	2016-01-01	NO
G1496	PRJEB38719	ERR4195748	166.4	L4.10	CL110	2046	0.75	male	SPAIN	-	ALICANTE	no	no	no	no	no	no	no	negative	positive	extrapulmonary	initial	2016	2016-01-04	2016-01-13	2016-01-12	NO
G1994	PRJEB38719	ERR4195874	110.6	L4.10	CL110		23	male	PAKISTAN	2013	ALICANTE	no	no	no	no	no	no	no	negative	positive	pulmonary	initial	2017	2017-03-03	2017-04-12	2017-04-11	NO
G701m	PRJEB38719	ERR4195603	75.4	L4.1.2.1	CL111	NA	NA	NA	NA	NA	VALENCIA	NA	NA	NA	NA	NA	no	NA	NA	NA	NA	NA	NA	NA	NA	NA	NA
G706FE32	PRJEB38719	ERR4195430	54.8	L4.1.2.1	CL111	NA	NA	NA	NA	NA	VALENCIA	NA	NA	NA	NA	NA	no	NA	NA	NA	NA	NA	NA	NA	NA	NA	NA
G1782	PRJEB38719	ERR4195419	317.8	L4.3.2	CL112		33	male	PALESTINE	2012	ALICANTE	yes	yes	no	yes	no	no	no	negative	positive	pulmonary	initial	2016	2016-07-15	2016-11-12	2016-11-12	YES
G1954	PRJEB38719	ERR4195505	278.3	L4.3.2	CL112	NA	NA	NA	NA	NA	ALICANTE	NA	NA	NA	NA	NA	no	NA	NA	NA	NA	NA	NA	NA	NA	NA	NA
G1763	PRJEB38719	ERR4195835	142.7	L4.10	CL113		82	male	SPAIN	-	CASTELLON	no	no	no	no	no	no	no	negative	positive	extrapulmonary	initial	2016	2016-03-15		2016-07-02	YES
G1769	PRJEB38719	ERR4195840	100.6	L4.10	CL113		23	male	RUMANIA	2009	CASTELLON	no	no	no	no	no	no	no	negative	positive	pulmonary	initial	2016	2016-05-30	2016-06-23	2016-06-23	NO
G1724	PRJEB38719	ERR4195818	268.2	L4.1.2.1	CL114	NA	NA	NA	NA	NA	CASTELLON	NA	NA	NA	NA	NA	no	NA	NA	NA	NA	NA	NA	NA	NA	NA	NA
G1770	PRJEB38719	ERR4195435	110.2	L4.1.2.1	CL114		49	male	RUMANIA	2003	CASTELLON	no	no	no	no	no	no	no	positive	positive	pulmonary	initial	2016	2016-04-01	2016-05-31	2016-05-31	NO
G1620	PRJEB38719	ERR4195400	91.0	L4.1.2	CL115	2208	41	female	SPAIN	-	ALICANTE	no	no	no	no	no	no	no	positive	positive	pulmonary	initial	2016	2016-03-14	2016-07-19	2016-07-18	YES
G1628	PRJEB38719	ERR4195378	139.3	L4.1.2	CL115		40	male	ALGERIA	1997	VALENCIA	yes	no	no	no	no	no	no	positive	positive	pulmonary	initial	2016	2016-03-30	2016-05-25	2016-05-25	NO
G1564	PRJEB38719	ERR4195223	117.2	L4.3.2	CL116	2090	79	male	SPAIN	-	CASTELLON	no	no	no	yes	no	no	no	positive	positive	pulmonary	initial	2015	2015-11-04	2015-12-04	2015-12-04	NO
G1742	PRJEB38719	ERR4195827	105.7	L4.3.2	CL116	2090	39	female	SPAIN	-	CASTELLON	no	no	no	no	no	no	no	negative	positive	pulmonary	initial	2016	2016-01-04	2016-02-25	2016-02-25	NO
G1505	PRJEB38719	ERR4195754	92.5	L4.1.2.1	CL117		96	female	SPAIN	-	VALENCIA	no	no	no	no	no	no	no	positive	positive	pulmonary	initial	2015	2015-12-19	2015-12-26	2015-12-25	NO
G1506	PRJEB38719	ERR4195444	155.6	L4.1.2.1	CL117		33	male	MOROCCO	2015	ALICANTE	no	no	no	no	no	no	no	negative	positive	pulmonary	initial	2016		2015-10-28	2016-02-22
G73	PRJEB38719	ERR4195431	82.8	L4.1.2.1	CL118		48	female	COLOMBIA	2000	VALENCIA	no	no	no	no	no	no	no	positive	positive	pulmonary	initial	2014	2014-01-10	2014-03-27	2014-03-27	NO
G1428	PRJEB38719	ERR4195733	99.3	L4.1.2.1	CL118	NA	NA	NA	NA	NA	VALENCIA	NA	NA	NA	NA	NA	no	NA	NA	NA	NA	NA	NA	NA	NA	NA	NA
G1285	PRJEB38719	ERR4195696	57.6	L4.10	CL119	2001	49	female	BOLIVIA	2000	VALENCIA	no	no	no	no		no	no	negative	positive	pulmonary	initial	2015	2015-07-01	2015-08-19	2015-08-19	NO
G1334	PRJEB38719	ERR4195411	126.9	L4.10	CL119	2001	12	male	SPAIN	-	VALENCIA	no	no	no	no	no	no	no	negative	positive	pulmonary	initial	2015	2015-11-02	2015-11-12	2015-11-11	NO
G1161	PRJEB38719	ERR4195679	123.0	L4.2.2	CL120		25	male	SPAIN	-	CASTELLON	no	no	no	no	no	yes	no	positive	positive	pulmonary	initial	2015	2015-08-03	2015-08-20	2015-08-20	NO
G1736	PRJEB38719	ERR4195824	137.6	L4.2.2	CL120		39	male	MOROCCO	2000	CASTELLON	no	no		no	no	no	no	positive	positive	pulmonary	initial	2016	2016-02-01	2016-05-02	2016-05-02	YES
G103	PRJEB38719	ERR4195283	92.8	L4.3.3	CL121		36	female	SPAIN	-	ALICANTE	no	no	no	no	no	no	no	positive	positive	pulmonary	initial	2014	2013-12-24	2014-03-12	2014-03-10	NO
G1957	PRJEB38719	ERR4195433	221.7	L4.3.3	CL121		49	male	SPAIN	-	ALICANTE	yes	yes	no	no	no	no	no	positive	positive	pulmonary	initial	2016		2016-12-28	2016-12-27
G01	PRJEB38719	ERR4195878	178.4	L4.1.2.1	unique		23	female	RUMANIA	2006	CASTELLON	no	no	no	no	no	no	no	positive	positive	pulmonary	initial	2014	2013-12-20	2013-12-27	2013-12-27	NO
G02	PRJEB38719	ERR4195455	96.8	L4.1.2.1	unique		39	male	SPAIN	-	CASTELLON	yes	no	no	yes	no	yes	no	positive	positive	pulmonary	initial	2014	2014-01-10	2014-02-01	2014-02-03	NO
G03	PRJEB38719	ERR4195456	79.7	L4.1.2.1	unique		45	female	SPAIN	-	CASTELLON	no	no	no	yes	no	no	no	positive	positive	pulmonary	initial	2014	2013-06-01	2014-02-12	2014-02-11	YES
G22	PRJEB38719	ERR4195516	64.9	L4.1.2.1	unique		53	male	RUMANIA	2010	VALENCIA	yes	no	no	no	no	no	no	positive	positive	pulmonary	initial	2014	2013-11-15	2014-01-05	2014-01-07	NO
G26	PRJEB38719	ERR4195529	70.8	L4.3.2	unique		49	female	SPAIN	-	VALENCIA	no	no	no	no	no	no	no	positive	positive	pulmonary	previous treatment	2014	2014-01-27	2014-02-13	2014-02-13	NO
G58	PRJEB38719	ERR4195593	61.5	L4.3.4.2	unique		46	female	SPAIN	-	VALENCIA	no	no	no	no	no	no	no	positive	positive	pulmonary	initial	2014	2013-11-01	2014-04-03	2014-04-03	YES
G63	PRJEB29604	ERR2884701	86.8	L4.10	unique		40	male	SPAIN	-	VALENCIA	no	no	yes	no		no	no	negative	positive	pulmonary	initial	2014	2014-01-13	2014-05-07	2014-05-06	YES
G67m	PRJEB38719	ERR4195326	70.9	L4.10	unique	1742	45	male	RUMANIA	2009	VALENCIA	yes	no	no	no		no	no	positive	positive	pulmonary	initial	2014	2014-01-01	2014-05-09	2014-04-30	YES
G69	PRJEB38719	ERR4195340	92.3	L4.1.2.1	unique		29	male	SENEGAL	2008	VALENCIA	no	no	no	no	no	yes	no	negative	positive	extrapulmonary	initial	2014	2013-10-18	2014-04-24	2014-04-24	YES
G75	PRJEB38719	ERR4195446	61.8	L4.3.2	unique		81	male	SPAIN	-	ALICANTE	no	no	no	no	no	no	no	negative	positive	pulmonary	initial	2014	2013-12-20	2014-01-23	2014-01-22	NO
G77	PRJEB29604	ERR2884708	116.2	L4.10	unique		46	male	SPAIN	-	ALICANTE		yes	no	no	yes	no	no	positive	positive	pulmonary	initial	2013			2013-12-10
G79	PRJEB38719	ERR4195271	306.7	L4.3.1	unique		22	female	MOROCCO	2004	ALICANTE	no	no	no	no	no	no	no	negative	positive	extrapulmonary	initial	2014	2013-10-15	2013-12-16	2014-01-03	NO
G81	PRJEB38719	ERR4195465	71.5	L4.3.2	unique		84	female	SPAIN	-	ALICANTE	no	no	no	no	no	no	no	positive	positive	extrapulmonary	initial	2014	2014-02-20	2014-02-27	2014-02-27	NO
G85	PRJEB38719	ERR4195611	79.8	L4.4.1.1	unique		72	female	SPAIN	-	ALICANTE	no	no	no	no	no	no	no	positive	positive	pulmonary	initial	2014	2014-02-11	2014-03-18	2014-03-11	NO
G91	PRJEB38719	ERR4195243	108.0	L4.10	unique		34	male	RUMANIA	2003	ALICANTE	no	no	no	yes	no	no	no	positive	positive	pulmonary	previous treatment	2015	2014-04-15	2015-04-16	2015-04-16	YES
G95m	PRJEB38719	ERR4195285	119.9	L4.1.2.1	unique	NA	NA	NA	NA	NA	ALICANTE	NA	NA	NA	NA	NA	no	NA	NA	NA	NA	NA	NA	NA	NA	NA	NA
G100	PRJEB38719	ERR4195457	33.0	L2.2.1	unique		39	female	SPAIN	-	ALICANTE	no	no	no	no	no	no	no	positive	positive	pulmonary	initial	2014	2014-05-12	2014-05-26	2014-05-26	NO
G101	PRJEB38719	ERR4195649	224.1	L4.3.2	unique		41	male	SPAIN	-	ALICANTE	no	no	yes	no	yes	no	no	negative	positive	pulmonary	initial	2014		2014-05-06	2014-05-07
G102	PRJEB38719	ERR4195652	100.4	L2.2.1	unique		42	male	GREECE	2009	ALICANTE	no	yes	no	no	no	no	no	positive	positive	pulmonary	initial	2014	2014-03-24	2014-04-07	2014-03-31	NO
G107	PRJEB38719	ERR4195665	73.1	L3	unique		43	male	INDIA	2005	VALENCIA	no	no	no	no	no	no	no	positive	positive	extrapulmonary	initial	2014	2014-04-19	2014-05-05	2014-05-02	NO
G109	PRJEB38719	ERR4195222	92.4	L4.10	unique		27	female	SPAIN	-	VALENCIA	no	no	no	no	no	no	no	positive	positive	pulmonary	initial	2014	2014-02-01	2014-05-14	2014-04-24	NO
G110	PRJEB38719	ERR4195669	76.7	L4.1.2.1	unique		59	male	SPAIN	-	VALENCIA	no	no	no	yes	no	no	no	positive	positive	pulmonary	initial	2014	2014-03-08	2014-05-16	2014-05-15	NO
G111	PRJEB38719	ERR4195329	87.4	L4.1.2.1	unique	1681	45	female	SPAIN	-	VALENCIA	no	no	no	no	no	no	no	positive	positive	pulmonary	initial	2014	2014-03-01	2014-06-12	2014-06-12	YES
G112	PRJEB38719	ERR4195671	76.5	L2.2.2	unique	NA	NA	NA	NA	NA	VALENCIA	NA	NA	NA	NA	NA	no	NA	NA	NA	NA	NA	NA	NA	NA	NA	NA
G116	PRJEB38719	ERR4195678	64.2	L4.10	unique		100	female	SPAIN	-	VALENCIA	no	no	no			no	no	positive	positive	extrapulmonary	initial	2014	2014-04-02	2014-05-07	2014-05-07	NO
G117	PRJEB38719	ERR4195450	73.8	L4.1.2.1	unique		48	male	SPAIN	-	VALENCIA		no	no	no	yes	no	no	negative	positive	pulmonary	initial	2014	2014-05-16	2014-09-18	2014-06-06	NO
G119	PRJEB38719	ERR4195683	87.7	L4.10	unique		31	male	RUMANIA	2010	VALENCIA	no	no	no	no	no	no	no	positive	positive	pulmonary	initial	2014	2014-02-06	2014-05-25	2014-05-22	YES
G122	PRJEB38719	ERR4195689	86.5	L4.1.2	unique		30	male	MOROCCO	2002	VALENCIA	no	no	no	no	no	no	no	positive	positive	pulmonary	initial	2014	2014-06-10	2014-06-16	2014-06-16	NO
G124	PRJEB38719	ERR4195268	103.1	L4.1.2.1	unique		61	male	SPAIN	-	VALENCIA	yes		no	yes	no	no	no	positive	positive	pulmonary	initial	2014	2014-03-12	2014-06-02	2014-05-30	NO
G126	PRJEB38719	ERR4195289	72.0	L4.10	unique		36	male	RUMANIA	2009	VALENCIA	yes	no	no	no	no	no	no	positive	positive	pulmonary	initial	2014	2013-12-01	2014-02-04	2014-02-04	NO
G127	PRJEB38719	ERR4195257	96.5	L4.4.1.2	unique		87	female	SPAIN	-	VALENCIA	no	no	no	no	no	no	no	negative	positive	pulmonary	initial	2014	2014-02-14	2014-03-15	2014-03-10	NO
G129	PRJEB38719	ERR4195697	142.1	L3.1.2.1	unique		26	male	PAKISTAN	2012	VALENCIA	no	no	no	no	no	no	no	negative	positive	extrapulmonary	initial	2014	2014-02-10	2014-06-10	2014-06-05	YES
G135	PRJEB38719	ERR4195711	77.3	L4.10	unique		79	male	SPAIN	-	VALENCIA	no	no	no	yes	no	no	no	negative	positive	extrapulmonary	initial	2014		2014-07-24	2014-05-23
G137	PRJEB38719	ERR4195724	107.7	L4.3.2	unique		36	male	MOROCCO	2000	VALENCIA		no	yes	no	no	no	no	positive	positive	pulmonary	initial	2014	2014-04-22	2014-05-06	2014-05-06	NO
G143	PRJEB38719	ERR4195734	78.0	L4.10	unique		45	female	SPAIN	-	VALENCIA	yes	no	no	no	no	no	no	positive	positive	pulmonary	initial	2014	2014-04-06	2014-06-07	2014-06-06	NO
G149	PRJEB38719	ERR4195747	36.1	L4.1.2.1	unique	1619	39	male	RUMANIA	2006	CASTELLON	yes	no	no	no	no	no	no	positive	positive	pulmonary	initial	2014	2014-01-20	2014-04-01	2014-03-31	NO
G150m	PRJEB38719	ERR4195755	130.4	L4.3.2	unique		47	male	CHINA	1993	CASTELLON	yes	no	no	no	no	yes	no	negative	positive	pulmonary	initial	2014	2014-02-01	2014-04-16	2014-04-15	NO
G151	PRJEB38719	ERR4195492	75.8	L4.1.2.1	unique		37	female	SPAIN	-	CASTELLON	no	no	no	no	no	no	no	positive	positive	pulmonary	initial	2014	2014-03-10	2014-04-26	2014-04-26	NO
G165	PRJEB38719	ERR4195366	62.3	L4.1.2.1	unique		58	female	RUMANIA	2003	CASTELLON	no	no	no	no	no	no	no	negative	positive	extrapulmonary	initial	2014	2013-11-20	2014-05-28	2014-05-28	YES
G166	PRJEB38719	ERR4195791	52.6	L4.1.2.1	unique		22	male	RUMANIA	2013	CASTELLON	no	no	no	no	no	no	no	negative	positive	extrapulmonary	initial	2014	2013-11-25	2014-05-19	2014-05-22	YES
G179	PRJEB38719	ERR4195843	169.2	L3	unique	1611	28	female	INDIA	2012	VALENCIA	no	no	no	no	no	no	no	positive	positive	pulmonary	initial	2014	2014-02-16	2014-04-19	2014-04-18	NO
G180m	PRJEB38719	ERR4195846	83.3	L4.3.2	unique		72	female	SPAIN	-	VALENCIA	no	no	no	no	no	no	no	negative	positive	pulmonary	initial	2014	2014-02-07	2014-05-03	2014-05-03	NO
G182	PRJEB38719	ERR4195849	118.9	L4.1.2.1	unique		51	male	SPAIN	-	VALENCIA	no	no	no	no	no	no	no	positive	positive	pulmonary		2014	2014-06-17	2014-06-17	2014-06-17	NO
G183	PRJEB38719	ERR4195854	60.5	L4.1.1	unique	1649	19	male	RUMANIA	2007	VALENCIA	no	no	no	no	no	no	no	positive	positive	pulmonary	initial	2014	2014-03-26	2014-04-28	2014-04-28	NO
G186	PRJEB38719	ERR4195402	123.9	L4.3.2	unique		76	female	SPAIN	-	VALENCIA	no	no	no	yes	no	no	no	negative	positive	pulmonary	initial	2014	2013-11-20	2014-04-08	2014-03-26	YES
G188	PRJEB38719	ERR4195860	79.6	L1.2.2	unique		25	female	INDIA	2013	VALENCIA	no	no	no	no	no	no	no	negative	positive	extrapulmonary		2014	2014-01-31	2014-03-17	2014-03-17	NO
G190	PRJEB38719	ERR4195861	101.2	L4.10	unique		25	male	SPAIN	-	VALENCIA	no	no	no	no	no	no	no	positive	positive	pulmonary	initial	2014	2014-01-20	2014-02-27	2014-02-25	NO
G191	PRJEB38719	ERR4195863	82.5	L4.10	unique		49	male	SPAIN	-	VALENCIA	no	no	no	no	no	no	no	negative	positive	pulmonary	initial	2014	2014-01-24	2014-03-17	2014-03-17	NO
G195	PRJEB38719	ERR4195371	105.4	L3	unique		31	male	PAKISTAN	2008	VALENCIA	no	no	no	no	no	no	no	positive	positive	pulmonary	initial	2014	2013-10-18	2014-02-18	2014-02-18	YES
G196	PRJEB38719	ERR4195454	106.9	L4.3.2	unique		57	male	SPAIN	-	VALENCIA	no	no	no	yes	no	no	no	positive	positive	extrapulmonary	initial	2014	2014-03-20	2014-06-10	2014-04-13	NO
G202	PRJEB38719	ERR4195225	97.4	L4.3.2	unique		32	male	MOROCCO	2007	VALENCIA	no	no	no	no	no	no	no	positive	positive	pulmonary	initial	2014	2014-04-08	2014-04-20	2014-04-20	NO
G205	PRJEB38719	ERR4195296	123.7	L4.1.2.1	unique	NA	NA	NA	NA	NA	VALENCIA	NA	NA	NA	NA	NA	no	NA	NA	NA	NA	NA	NA	NA	NA	NA	NA
G208	PRJEB38719	ERR4195877	86.3	L4.10	unique		42	male	SPAIN	-	VALENCIA	yes	no	no	no	no	no	no	positive	positive	pulmonary	initial	2014	2014-03-15	2014-05-29	2014-05-28	NO
G209	PRJEB38719	ERR4195511	80.9	L4.3.2	unique		30	female	SPAIN	-	VALENCIA	no	no	no	no	no	no	no	negative	positive	extrapulmonary	initial	2014	2014-06-20	2014-06-26	2014-06-26	NO
G211	PRJEB38719	ERR4195512	118.6	L4.3.4.1	unique		44	male	SPAIN	-	ALICANTE	no	no	no	no	no	no	no	positive	positive	pulmonary	initial	2014	2013-12-26	2014-02-28	2014-02-28	NO
G212	PRJEB38719	ERR4195513	86.7	L4.10	unique		48	female	SPAIN	-	ALICANTE	no	no	yes	yes	no	yes	no	positive	positive	pulmonary	initial	2014	2014-02-07	2014-05-05	2014-05-05	NO
G213	PRJEB38719	ERR4195275	84.1	L4.10	unique		29	male	RUMANIA	2010	ALICANTE	no	no	no	no	no	no	no	positive	positive	pulmonary	initial	2014	2014-03-10	2014-05-12	2014-05-12	NO
G217	PRJEB38719	ERR4195299	100.0	L4.1.2.1	unique		85	female	SPAIN	-	VALENCIA	no	no	no	no	no	no	no	positive	positive	pulmonary	initial	2014	2014-03-28	2014-04-24	2014-04-10	NO
G222	PRJEB38719	ERR4195458	94.8	L4.1.2.1	unique		45	female	RUMANIA	2013	VALENCIA	no	no	no	no	no	no	no	positive	positive	pulmonary	initial	2014	2014-05-07	2014-06-28	2014-06-28	NO
G224	PRJEB38719	ERR4195517	69.7	L4.1.2.1	unique		59	male	SPAIN	-	VALENCIA	no	no	no	no	no	no	no	negative	positive	pulmonary	initial	2014	2014-03-12	2014-07-17	2014-07-09	YES
G226	PRJEB38719	ERR4195518	80.1	L4.3.3	unique		76	female	SPAIN	-	VALENCIA	no	no	no	no	no	no	no	negative	positive	pulmonary	initial	2014	2014-06-14	2014-09-02	2014-09-02	NO
G227	PRJEB38719	ERR4195519	83.9	L4.1.1.3	unique		77	female	SPAIN	-	VALENCIA	no	no	no	no	no	no	no	negative	positive	extrapulmonary	previous treatment	2014	2014-06-10	2014-07-08	2014-07-08	NO
G229	PRJEB38719	ERR4195297	110.9	L4.4.1.1	unique		18	male	MOROCCO	2005	ALICANTE	no	no	no	no	no	no	no	positive	positive	pulmonary	initial	2014	2014-06-07	2014-06-27	2014-06-27	NO
G237	PRJEB38719	ERR4195251	148.7	L4.1.2.1	unique		47	female	RUMANIA	2014	VALENCIA	no	no	no	no	no	no	no	negative	positive	pulmonary	initial	2014	2014-05-14	2014-09-02	2014-09-02	YES
G243	PRJEB38719	ERR4195341	211.4	L4.10	unique		45	male	RUMANIA	2010	VALENCIA	yes	no	no	yes	yes	no	no	negative	positive	pulmonary	initial	2014	2014-08-04	2014-08-22	2014-08-22	NO
G245m	PRJEB38719	ERR4195523	77.6	L4.3.2	unique		53	female	SPAIN	-	VALENCIA	no	no	no	no	no	no	no	positive	positive	pulmonary	initial	2014	2014-01-25	2014-01-26	2014-01-26	NO
G246	PRJEB38719	ERR4195524	140.7	L4.10	unique		78	male	SPAIN	-	VALENCIA	no	no	no	no	no	no	no	negative	positive	pulmonary	initial	2014	2014-06-01	2014-08-08	2014-08-08	NO
G251	PRJEB38719	ERR4195262	102.2	L4.1.2.1	unique		47	female	SPAIN	-	VALENCIA			no	no	yes	no	no	positive	positive	pulmonary	initial	2014	2014-03-27	2014-03-28	2014-03-28	NO
G253	PRJEB38719	ERR4195307	111.9	L4.4.2	unique		27	female	SPAIN	-	VALENCIA	no	no	no	no	no	no	no	positive	positive	pulmonary	initial	2014	2014-04-25	2014-07-10	2014-07-11	NO
G256	PRJEB38719	ERR4195298	120.2	L4.1.2.1	unique	NA	NA	NA	NA	NA	VALENCIA	NA	NA	NA	NA	NA	no	NA	NA	NA	NA	NA	NA	NA	NA	NA	NA
G257	PRJEB38719	ERR4195527	90.0	L4.1.1	unique		49	male	SPAIN	-	VALENCIA	no	no	yes	no	no	no	no	positive	positive	pulmonary	initial	2014	2014-05-13	2014-08-20	2014-08-20	YES
G259	PRJEB38719	ERR4195528	97.2	L4.10	unique		47	female	SPAIN	-	VALENCIA	no	no	no	no	yes	no	no	positive	positive	extrapulmonary	initial	2014	2014-06-24	2014-08-21	2014-08-21	NO
G261	PRJEB38719	ERR4195459	89.9	L4.4.1.1	unique		90	female	SPAIN	-	VALENCIA	no	no	no	no	no	no	no	positive	positive	pulmonary	initial	2014	2014-09-30	2014-10-07	2014-10-07	NO
G266	PRJEB38719	ERR4195231	61.6	L4.3.2	unique		78	female	SPAIN	-	CASTELLON	no	no	no	no	no	no	no	negative	positive	extrapulmonary	initial	2014	2014-06-01	2014-08-07	2014-08-07	NO
G278m	PRJEB38719	ERR4195226	244.9	L4.10	unique		35	male	SPAIN	-	CASTELLON	no	no	yes	no	no	yes	no	positive	positive	pulmonary	initial	2014	2014-09-18	2014-09-23	2014-09-23	NO
G280	PRJEB38719	ERR4195532	99.4	L4.10	unique	1679	27	female	RUMANIA	2006	CASTELLON	no	no	no	no	no	no	no	positive	positive	pulmonary	initial	2014	2014-06-10	2014-08-18	2014-08-18	NO
G290m	PRJEB38719	ERR4195352	42.7	L4.3.3	unique		55	male	MOROCCO	1982	CASTELLON	no	no	no	no	no	no	no	positive	positive	pulmonary	initial	2014	2014-07-04	2014-07-25	2014-07-24	NO
G298m	PRJEB38719	ERR4195534	120.6	L4.1.2.1	unique		18	female	ECUADOR	2006	CASTELLON	yes	no	no	no	no	no	no	negative	positive	extrapulmonary	initial	2014	2014-06-01	2014-07-01	2014-07-01	NO
G313m	PRJEB38719	ERR4195349	102.7	L4.10	unique		61	male	SPAIN	-	CASTELLON	no	no	no	yes	no	yes	no	positive	positive	pulmonary	initial	2014			2014-10-04
G320m	PRJEB38719	ERR4195310	140.7	L4.1.2.1	unique		48	female	DOMINICAN REP	2007	CASTELLON	no	no	no	no	no	no	no	negative	positive	extrapulmonary	initial	2014	2014-04-10	2014-05-28	2014-05-29	NO
G321m	PRJEB38719	ERR4195537	132.6	L4.1.2.1	unique		16	female	MOROCCO	2003	CASTELLON	no	no	no	no	no	no	no	positive	positive	extrapulmonary	initial	2014	2014-08-20	2014-09-18	2014-09-18	NO
G323m	PRJEB38719	ERR4195367	No replicates of samples were realized. because this is not necesary for this kind of	L4.1.2.1	unique		53	male	SPAIN	-	VALENCIA	no	no	no	no	no	no	no	positive	positive	pulmonary	initial	2014	2014-06-20	2014-08-04	2014-08-04	NO
G337	PRJEB38719	ERR4195370	analysis. In Supplemental figure 1. exclusion of samples is detailed. Sequences were	L4.3	unique		19	female	SPAIN	-	VALENCIA	no	no	no	no	no	no	no	positive	positive	pulmonary	initial	2014	2014-05-30	2014-09-18	2014-09-18	YES
G338m	PRJEB38719	ERR4195540	upload to ENA under the project numbers PRJEB29604 and PRJEB38719	L4.1.2.1	unique		48	male	SPAIN	-	VALENCIA	no	no	no	yes	no	no	no	negative	positive	pulmonary	initial	2014	2014-08-12	2014-09-19	2014-09-19	NO
G348m	PRJEB38719	ERR4195541	148.3	L4.3.2	unique		44	male	SPAIN	-	VALENCIA	no	no	no	no	no	no	no	positive	positive	pulmonary	initial	2014	2014-06-20	2014-09-24	2014-09-24	YES
G350m	PRJEB38719	ERR4195542	164.7	L4.3.2	unique		41	female	SPAIN	-	VALENCIA	no	no	no	no	no	no	no	negative	positive	pulmonary		2014	2014-07-17	2014-09-18	2014-09-17	NO
G351	PRJEB38719	ERR4195543	103.6	L4.3.3	unique		26	female	SPAIN	-	VALENCIA	no	no	no	no	no	no	no	positive	positive	pulmonary	initial	2014	2014-08-20	2014-09-15	2014-09-20	NO
G357m	PRJEB38719	ERR4195263	114.8	L4.10	unique		62	male	SPAIN	-	VALENCIA	no	no	no	yes	no	no	no	negative	positive	extrapulmonary	initial	2014	2014-03-15	2014-06-10	2014-06-04	NO
G358m	PRJEB38719	ERR4195545	115.3	L4.1.2.1	unique		90	female	SPAIN	-	VALENCIA	no	no	no	yes	no	no	no	positive	positive	extrapulmonary	initial	2014	2014-10-14	2014-10-16	2014-10-27	NO
G394m	PRJEB38719	ERR4195227	146.7	L3	unique		48	male	BANGLADESH	2003	ALICANTE	no	no	no	no	no	no	no	negative	positive	pulmonary	initial	2014	2014-02-24	2014-03-26	2014-03-26	NO
G398m	PRJEB38719	ERR4195321	136.0	L4.1.2.1	unique		35	male	SPAIN	-	ALICANTE	no	yes	no	no	no	no	no	positive	positive	pulmonary	initial	2014	2014-06-01	2014-06-19	2014-06-18	NO
G402m	PRJEB38719	ERR4195548	133.7	L4.3.4.2	unique	1666	34	male	SPAIN	-	ALICANTE	no	no	no	no		no	no	positive	positive	pulmonary	initial	2014	2014-01-25	2014-06-25	2014-06-24	YES
G403m	PRJEB38719	ERR4195549	170.7	L4.1.2.1	unique		50	male	SPAIN	-	ALICANTE	yes	no	no	no	no	no	no	positive	positive	pulmonary	initial	2014		2014-08-13	2014-08-12
G406m	PRJEB38719	ERR4195550	125.0	L4.3.3	unique		55	male	SPAIN	-	ALICANTE			yes			no	no	positive	positive	pulmonary	initial	2014		2014-03-18	2014-03-18
G407m	PRJEB38719	ERR4195551	181.3	L4.3.2	unique		37	female	SPAIN	-	ALICANTE		yes	no	no	yes	yes	no	positive	positive	pulmonary	initial	2014	2014-09-02	2014-10-23	2014-10-10	NO
G408m	PRJEB38719	ERR4195552	106.3	L4.3.2	unique		49	male	SPAIN	-	ALICANTE	no	no	no	no	no	no	no	negative	positive	pulmonary	initial	2014	2014-10-06	2014-10-30	2014-10-29	NO
G409	PRJEB38719	ERR4195553	125.0	L4.1.2.1	unique		46	male	SPAIN	-	ALICANTE	no	no	no	no	yes	yes	no	negative	positive	extrapulmonary	initial	2014	2014-07-21	2014-09-08	2014-09-10	NO
G410m	PRJEB38719	ERR4195554	65.1	L4.1.2.1	unique		47	female	MOROCCO	1994	ALICANTE	no	no	no	no	no	no	no	positive	positive	pulmonary	initial	2014	2014-08-27	2014-08-30	2014-08-30	NO
G419m	PRJEB38719	ERR4195555	128.8	L4.3.3	unique		67	female	MOROCCO	2001	VALENCIA	no	no	no	no		NA	no	not done	positive	extrapulmonary	initial	2014	2014-05-01	2014-10-29	2014-09-05	YES
G428m	PRJEB38719	ERR4195556	185.2	L4.3.2	unique		50	female	SPAIN	-	VALENCIA	no	no	no	no	no	no	no	negative	positive	pulmonary		2014	2014-10-13	2014-12-11	2014-12-11	NO
G440	PRJEB38719	ERR4195420	181.8	L4.2.1	unique		59	female	RUMANIA	2009	VALENCIA	no	no	no	no	no	no	no	positive	positive	pulmonary	initial	2015	2014-11-03	2015-01-05	2015-01-05	NO
G441m	PRJEB38719	ERR4195558	142.2	L4.1.2.1	unique		33	female	MOROCCO	2010	ALICANTE	no	no	no	no	no	no	no	negative	positive	extrapulmonary	initial	2015		2014-10-22	2014-10-21
G442m	PRJEB38719	ERR4195559	134.5	L4.1.2.1	unique		42	male	SPAIN	-	VALENCIA	no	no	no	no	no	no	no	positive	positive	pulmonary	initial	2013	2013-11-22	2013-11-28	2013-11-27	NO
G444	PRJEB38719	ERR4195560	49.3	L4.3.2	unique		46	male	SPAIN	-	VALENCIA	no	yes	yes	no	yes	yes	no	positive	positive	pulmonary	previous treatment	2013	2013-09-01	2013-10-06	2013-10-06	NO
G450m	PRJEB38719	ERR4195561	152.1	L4.3.4.2	unique		44	male	SPAIN	-	VALENCIA	yes	no	no	no		no		negative	positive	pulmonary	initial	2014	2014-08-27	2014-12-04	2014-12-04	YES
G453m	PRJEB38719	ERR4195562	149.6	L4.10	unique		40	female	RUMANIA	2006	VALENCIA	no	no	no	no	no	no	no	positive	positive	pulmonary	initial	2014	2014-09-15	2014-09-17	2014-09-17	NO
G460	PRJEB38719	ERR4195234	65.6	L4.10	unique		31	male	MAURITANIA	2006	VALENCIA			no	no	no	yes	no	negative	positive	extrapulmonary	initial	2015	2014-09-29	2014-11-03	2014-11-03	NO
G463m	PRJEB38719	ERR4195423	172.8	L4.10	unique		47	female	PERU	2007	ALICANTE	no	no	no	no	no	no	no	positive	positive	extrapulmonary	initial	2014	2013-07-01	2014-01-27	2014-01-27	YES
G468m	PRJEB38719	ERR4195342	165.8	L4.3.2	unique		62	male	SPAIN	-	VALENCIA	yes	no	no	yes		no	no	negative	positive	pulmonary	initial	2014	2014-03-01	2014-06-05	2014-06-04	YES
G469m	PRJEB38719	ERR4195565	114.1	L4.3.1	unique		81	male	SPAIN	-	VALENCIA	no	no	no	no	no	no	no	negative	positive	pulmonary	initial	2014	2014-01-19	2015-03-22	2014-03-21	NO
G471m	PRJEB38719	ERR4195264	123.7	L4.1.2.1	unique		32	male	MOROCCO	2005	VALENCIA	no	no	no	no		NA	no	positive	positive	pulmonary	initial	2014	2013-12-31	2014-01-22	2014-01-20	NO
G478m	PRJEB38719	ERR4195281	128.9	L4.10	unique		84	male	SPAIN	-	VALENCIA	no	no	no	no	no	no	no	negative	positive	pulmonary	initial	2014	2013-12-12	2014-02-24	2014-02-04	NO
G482m	PRJEB38719	ERR4195568	123.8	L4.4.1.1	unique		61	male	SPAIN	-	VALENCIA	no	no	no	no	no	no	no	positive	positive	pulmonary	initial	2014	2013-04-15	2014-02-18	2014-02-18	YES
G486	PRJEB38719	ERR4195569	509.0	L4.10	unique		27	male	RUMANIA	2009	VALENCIA		no	no	no	no	no	no	positive	positive	pulmonary	previous treatment	2014	2013-12-17	2013-01-24	2014-01-22	NO
G498m	PRJEB38719	ERR4195570	124.6	L4.1.2.1	unique		56	male	SPAIN	-	ALICANTE	no	no	no	no	no	no	no	positive	positive	pulmonary	initial	2014	2014-01-21	2014-03-12	2014-03-11	NO
G499m	PRJEB38719	ERR4195571	151.5	L4.1.2.1	unique		43	male	SPAIN	-	ALICANTE	no	no	no	no	no	no	no	positive	positive	pulmonary	initial	2014	2014-02-01	2014-02-14	2014-02-14	NO
G501m	PRJEB38719	ERR4195572	126.6	L4.10	unique		75	female	SPAIN	-	VALENCIA	no	no	no	no	no	no	no	negative	positive	extrapulmonary	previous treatment	2014	2013-11-07	2014-04-15	2014-04-15	YES
G503m	PRJEB38719	ERR4195573	77.4	L4.1.2.1	unique		72	male	SPAIN	-	VALENCIA	no	no	no	no	no	no	no	negative	positive	pulmonary	initial	2014	2014-02-05	2014-04-10	2014-04-03	NO
G511m	PRJEB38719	ERR4195300	126.4	L3	unique		26	female	PAKISTAN	2011	VALENCIA	no	no	no	no	no	no	no	positive	positive	pulmonary	initial	2014	2014-06-18	2014-08-01	2014-07-31	NO
G512m	PRJEB38719	ERR4195575	100.1	L4.3.4.2	unique		30	female	SPAIN	-	ALICANTE	no	yes	no	no	no	yes	no	negative	positive	pulmonary	previous treatment	2013	2013-04-03	2013-05-15	2013-05-15	NO
G513m	PRJEB38719	ERR4195576	174.9	LBovis	unique		69	male	SPAIN	-	ALICANTE	no	no	no	yes	no	NA	no	negative	positive	extrapulmonary	initial	2014	2013-11-27	2014-11-05	2014-11-03	YES
G525m	PRJEB38719	ERR4195577	166.2	L4.10	unique		83	male	SPAIN	-	VALENCIA	no	no	no	yes	no	no	no	negative	positive	pulmonary	initial	2014		2014-06-25	2014-06-25
G536m	PRJEB29604	ERR2884692	101.0	L4.10	unique		51	male	SPAIN	-	VALENCIA		no	no	no	yes	no	no	positive	positive	extrapulmonary	initial	2014	2014-09-12	2014-10-17	2014-10-17	NO
G548	PRJEB38719	ERR4195578	56.3	L4.10	unique		36	female	SPAIN	-	VALENCIA	no	no	no	no	no	no	yes	positive	positive	pulmonary	initial	2015	2014-12-18	2015-02-18	2015-02-18	NO
G549m	PRJEB38719	ERR4195579	122.1	L4.3.3	unique		23	male	SPAIN	-	VALENCIA	no	no	no	no		no	no	negative	positive	extrapulmonary	initial	2013	2013-09-11	2013-10-30	2013-10-30	NO
G551m	PRJEB38719	ERR4195580	134.1	L4.2.2	unique		30	male	PAKISTAN	2006	VALENCIA	yes	no	no	no	no	yes	no	positive	positive	pulmonary	initial	2014	2014-03-06	2014-03-09	2014-03-09	NO
G556m	PRJEB38719	ERR4195301	161.6	L4.1.2.1	unique		46	female	SPAIN	-	VALENCIA	no		no	no	no	no	no	negative	positive	extrapulmonary	initial	2014		2014-03-07	2014-03-07
G558m	PRJEB38719	ERR4195582	127.0	L4.3.2	unique		49	female	BOLIVIA	2006	VALENCIA	yes	no	no	no	no	no	no	negative	positive	extrapulmonary	initial	2014	2012-11-14	2014-05-03	2014-04-02	YES
G559	PRJEB38719	ERR4195583	76.8	L4.3.2	unique		35	female	SPAIN	-	VALENCIA	no	no	no	no		no	no	negative	positive	extrapulmonary	initial	2014	2014-04-21	2014-06-10	2014-06-09	NO
G561m	PRJEB38719	ERR4195353	124.1	L4.10	unique		21	male	SPAIN	-	VALENCIA	yes	no	no	no	no	no	no	positive	positive	pulmonary	initial	2014	2014-10-31	2014-11-04	2014-11-04	NO
G563	PRJEB38719	ERR4195585	71.5	L4.3.2	unique		52	female	SPAIN	-	VALENCIA	no	no	no	no		no	no	negative	positive	pulmonary	initial	2014	2013-12-25	2014-08-28	2014-07-31	YES
G564m	PRJEB38719	ERR4195586	94.8	L4.4.1.1	unique		35	male	POLAND	2006	VALENCIA	yes		no	no	no	yes	no	negative	positive	pulmonary		2014	2012-03-24	2014-05-23	2014-05-23	YES
G568m	PRJEB38719	ERR4195265	104.3	L4.1.2.1	unique		88	female	SPAIN	-	VALENCIA	no	no	no	no	no	no	no	negative	positive	pulmonary	initial	2014	2014-03-10	2014-11-27	2014-10-21	YES
G570	PRJEB38719	ERR4195588	175.0	L4.10	unique		88	male	SPAIN	-	VALENCIA	no	no	no	no	no	no	no	negative	positive	extrapulmonary	initial	2014	2014-10-02	2014-11-03	2014-11-03	NO
G571m	PRJEB38719	ERR4195589	177.0	L4.1.2.1	unique		57	female	SPAIN	-	VALENCIA	no	no	no	no		no	no	negative	negative	extrapulmonary	initial	2014	2014-04-14	2014-08-25	2014-08-25	YES
G577	PRJEB38719	ERR4195302	149.2	L4.2.1	unique		40	female	LITHUANIA	2003	VALENCIA	no	no	no	no	no	no	no	positive	positive	pulmonary	initial	2014	2014-01-10	2014-02-07	2014-02-07	NO
G578m	PRJEB38719	ERR4195591	142.2	LBovis	unique		70	male	SPAIN	-	VALENCIA	no	no	no	no	no	no	no	negative	negative	extrapulmonary	initial	2015	2014-12-12	2015-01-09	2014-12-18	NO
G579	PRJEB38719	ERR4195592	79.3	L4.10	unique		47	female	SPAIN	-	VALENCIA	no	no	no	no		no	no	positive	positive	pulmonary	initial	2014	2014-03-05	2014-05-13	2014-05-13	NO
G581m	PRJEB38719	ERR4195266	128.4	L4.1.1	unique		36	female	BOLIVIA	2006	VALENCIA	no	no	no	no	no	no	no	negative	positive	pulmonary	previous treatment	2014	2014-02-02	2014-04-24	2014-04-24	NO
G584m	PRJEB38719	ERR4195249	127.8	L4.3.2	unique		95	female	SPAIN	-	VALENCIA	no	no	no	no	no	no	no	negative	positive	extrapulmonary	initial	2015	2014-10-15		2015-02-10	YES
G587	PRJEB38719	ERR4195594	110.3	L4.1.2.1	unique		58	female	SPAIN	-	VALENCIA	no	no	no	no	no	no		positive	positive	pulmonary	initial	2015	2014-04-01	2015-02-02	2015-01-30	YES
G594m	PRJEB38719	ERR4195355	177.5	L4.3.4.1	unique		50	male	SPAIN	-	VALENCIA	no	no	no	no	no	no	no	negative	positive	pulmonary		2014	2014-08-18	2014-09-16	2014-09-11	NO
G597	PRJEB38719	ERR4195596	97.3	L4.1.2.1	unique		46	female	ECUADOR	2009	VALENCIA	no	no	no	yes	no	no	no	positive	positive	pulmonary		2014	2014-10-08	2014-10-16	2014-10-16	NO
G634m	PRJEB38719	ERR4195273	156.7	L4.10	unique		57	male	SPAIN	-	ALICANTE	yes	no	no	yes	no	yes	no	positive	positive	pulmonary	initial	2015		2015-01-16	2015-01-16
G642	PRJEB38719	ERR4195232	92.6	L4.10	unique		26	male	SENEGAL	2014	VALENCIA	no	no	no	no	no	no	no	negative	positive	pulmonary		2014	2014-10-31	2014-11-08	2014-11-03	NO
G650	PRJEB38719	ERR4195599	105.2	L4.3.3	unique		29	female	SPAIN	-	VALENCIA	no	no	no	no	no	no	no	positive	positive	pulmonary	initial	2014	2014-04-15	2014-09-27	2014-09-27	YES
G651m	PRJEB38719	ERR4195600	136.2	L4.3.2	unique		60	male	SPAIN	-	VALENCIA	yes	no	no	no	no	no	no	positive	positive	pulmonary	initial	2014	2014-09-09	2014-12-12	2014-12-12	YES
G661m	PRJEB38719	ERR4195312	152.3	L4.4.1.1	unique		17	male	ECUADOR	2014	VALENCIA	no	no	no	no	no	no	no	negative	positive	extrapulmonary	initial	2015	2014-09-01	2015-01-23	2015-02-09	YES
G694m	PRJEB38719	ERR4195404	117.7	L4.10	unique		52	male	RUMANIA	2014	VALENCIA	yes	no	no	no	no	no	no	positive	positive	pulmonary	initial	2015	2015-01-15	2015-03-31	2015-03-30	NO
G697m	PRJEB38719	ERR4195463	155.3	L4.1.2.1	unique		49	male	MOROCCO	1994	VALENCIA	yes	no	no	no	no	no	no	positive	positive	pulmonary	initial	2015	2015-03-16	2015-03-27	2015-03-27	NO
G757m	PRJEB38719	ERR4195464	113.1	L4.10	unique	1796	33	female	RUMANIA	2012	ALICANTE	no	no	no	no	no	no	no	positive	positive	pulmonary	previous treatment	2015	2014-05-15	2015-02-05	2015-02-05	YES
G770m	PRJEB38719	ERR4195357	85.5	L4.1.3	unique		25	male	IVORY COAST	2015	VALENCIA	no	no	no	no	no	no	no	negative	positive	extrapulmonary	initial	2015	2015-03-18	2015-03-28	2015-03-27	NO
G818m	PRJEB38719	ERR4195277	124.2	L4.6.2.2	unique		49	male	SPAIN	-	VALENCIA	no	no	no	no	yes	no	no	negative	positive	pulmonary	previous treatment	2015	2015-02-01	2015-04-21	2015-05-15	YES
G820	PRJEB38719	ERR4195467	65.5	L4.3.1	unique		42	male	SPAIN	-	VALENCIA	yes	no			yes	NA	no	positive	positive	extrapulmonary	initial	2015	2015-02-08	2015-03-04	2015-03-04	NO
G822m	PRJEB38719	ERR4195605	125.9	L2.2.1	unique		45	male	CHINA	2015	VALENCIA	no		no	no	no	no	no	positive	positive	pulmonary	initial	2015	2015-02-15	2015-03-17	2015-03-17	NO
G824m	PRJEB38719	ERR4195606	82.6	L4.10	unique		73	female	SPAIN	-	VALENCIA	no	no	no	no	no	no	no	negative	positive	extrapulmonary	initial	2015	2014-09-04	2015-05-14	2015-05-06	YES
G825	PRJEB38719	ERR4195607	220.0	LCaprae	unique		54	male	SPAIN	-	VALENCIA	yes		no	no		no	no	negative	positive	pulmonary	initial	2015		2015-05-29	2015-05-15
G826m	PRJEB38719	ERR4195608	156.8	L4.10	unique		73	female	SPAIN	-	VALENCIA	no	no	no	no	no	no	no	positive	positive	pulmonary		2015	2014-12-14	2014-11-14	2015-05-13	YES
G828m	PRJEB38719	ERR4195609	101.1	L4.1.2.1	unique		41	male	ALGERIA	2012	VALENCIA		no	no	no	no	no	no	positive	positive	pulmonary	initial	2015	2015-01-08	2015-04-07	2015-04-07	NO
G838m	PRJEB38719	ERR4195304	96.7	L4.1.2.1	unique		2022-08-01	female	SPAIN	-	VALENCIA	no	no	no	no	no	no	no	negative	positive	pulmonary	initial	2014	2014-11-15	2014-12-07	2014-12-02	NO
G846m	PRJEB38719	ERR4195280	128.8	L4.1.2.1	unique		73	male	SPAIN	-	VALENCIA	no	no	no	no	no	no	no	negative	positive	pulmonary	initial	2015	2014-03-01	2015-03-16	2015-03-16	YES
G851m	PRJEB38719	ERR4195468	112.2	L4.6.2.2	unique		34	female	SENEGAL	2014	VALENCIA			no	no	no	no	no	positive	positive	extrapulmonary		2015	2015-02-16	2015-02-20	2015-02-19	NO
G854m	PRJEB38719	ERR4195612	133.4	L2.2.1	unique		17	female	SPAIN	-	VALENCIA	no	no	no	no	no	no	no	positive	positive	pulmonary	initial	2015	2014-12-10	2015-02-26	2015-02-25	NO
G856m	PRJEB38719	ERR4195613	118.8	L4.10	unique	1577	33	male	ALGERIA	2003	VALENCIA	no	no	no	no	no	no	no	positive	positive	pulmonary	initial	2015	2015-01-05	2015-03-16	2015-03-09	NO
G860m	PRJEB38719	ERR4195614	117.0	L4.1.2.1	unique		40	female	SPAIN	-	VALENCIA	no	no	no	no	no	no	no	positive	positive	pulmonary	initial	2015	2015-01-01	2015-02-03	2015-02-03	NO
G861m	PRJEB38719	ERR4195615	114.9	L4.3.4.2	unique		52	female	SPAIN	-	VALENCIA	no	no	yes	no	yes	no	no	negative	positive	extrapulmonary	initial	2015	2015-03-15	2015-05-14	2015-05-14	NO
G863m	PRJEB38719	ERR4195406	103.0	L4.3.2	unique		48	female	BOLIVIA	2007	VALENCIA	no	no	no	no	no	no	no	negative	positive	pulmonary	initial	2015	2015-02-03	2015-04-14	2015-04-14	NO
G866	PRJEB38719	ERR4195617	138.1	LBovis	unique		40	female	ARGENTINA	2010	VALENCIA	no	no	no	no	yes	no	no	negative	positive	extrapulmonary	initial	2015	2014-12-14	2015-04-22	2015-04-23	YES
G868m	PRJEB38719	ERR4195618	131.6	L4.3.2	unique		59	male	SPAIN	-	VALENCIA	yes	no	no	yes	no	yes	no	positive	positive	pulmonary	initial	2015	2015-02-01	2015-05-09	2015-05-09	YES
G870m	PRJEB38719	ERR4195619	156.2	L2.2.1	unique	1918	29	male	RUSIA	2014	ALICANTE	yes	yes	no	no	yes	no	no	positive	positive	pulmonary	initial	2014	2014-03-03	2014-04-24	2014-04-24	NO
G873m	PRJEB38719	ERR4195620	121.3	L4.10	unique		85	male	SPAIN	-	ALICANTE	no	no	no	no	no	no	no	negative	positive	pulmonary	initial	2015	2015-03-19	2015-04-22	2015-05-04	NO
G875m	PRJEB38719	ERR4195621	143.0	L2.2.1	unique		26	male	GEORGIA	2014	ALICANTE	no	no	yes	no	no	no	no	positive	positive	pulmonary	initial	2015	2015-05-14	2015-05-28	2015-05-28	NO
G876m	PRJEB38719	ERR4195622	122.4	L4.3.2	unique		64	male	SPAIN	-	ALICANTE	yes	no	no	yes	no	no	no	positive	positive	pulmonary	initial	2015	2015-04-29	2015-06-09	2015-06-09	NO
G879m	PRJEB38719	ERR4195399	128.9	L4.10	unique		36	female	BOLIVIA	2007	VALENCIA		no	no	no	no	NA	no	positive	negative	pulmonary	initial	2015	2014-07-02	2015-06-01	2015-06-01	YES
G880m	PRJEB38719	ERR4195624	132.3	L4.1.2.1	unique		84	female	SPAIN	-	VALENCIA	no	no	no	no	no	no	no	negative	positive	pulmonary	initial	2015	2013-02-12	2015-03-30	2015-03-30	YES
G884	PRJEB38719	ERR4195314	102.7	L4.1.2.1	unique		78	male	SPAIN	-	VALENCIA	no	no	no	no	no	no	no	positive	positive	extrapulmonary	initial	2015	2015-01-26	2015-05-06	2015-05-30	YES
G885	PRJEB38719	ERR4195626	160.1	L4.1.2.1	unique		19	female	COLOMBIA	2014	VALENCIA	no	no	no	no	no	no	no	positive	positive	pulmonary	initial	2015	2014-11-10	2015-01-28	2015-01-28	NO
G886	PRJEB38719	ERR4195627	99.7	L4.1.2.1	unique		84	female	SPAIN	-	VALENCIA	no	no	no	no	no	no	no	negative	positive	pulmonary		2015	2015-01-12	2015-02-25	2015-02-25	NO
G887	PRJEB38719	ERR4195628	170.1	L6	unique		26	female	MALI	2013	VALENCIA	no	no	no	no	no	no	no	negative	positive	extrapulmonary	initial	2015	2015-02-06	2015-03-10	2015-03-10	NO
G888	PRJEB38719	ERR4195629	118.1	L4.1.2.1	unique	1862	46	male	SPAIN	-	VALENCIA	no	no	no	no	no	no	no	negative	positive	pulmonary	initial	2015	2015-04-13	2015-05-27	2015-05-26	NO
G891	PRJEB38719	ERR4195320	90.1	L4.1.1	unique		38	male	ECUADOR	1999	VALENCIA	no	no	no	yes	no	no	no	negative	positive	pulmonary	initial	2014	2014-08-04	2014-08-18	2014-08-18	NO
G901	PRJEB38719	ERR4195631	97.2	L4.10	unique		49	male	BULGARIA	2005	VALENCIA	yes		no	no	no	yes	no	positive	positive	pulmonary		2015	2015-02-07	2015-05-07	2015-05-07	NO
G910	PRJEB38719	ERR4195469	183.5	L4.1.2.1	unique		67	male	SPAIN	-	VALENCIA	no	no	no	no	no	no	no	negative	positive	pulmonary		2015	2015-05-15	2015-06-12	2015-06-12	NO
G919	PRJEB38719	ERR4195633	144.2	L4.3.2	unique		38	female	SPAIN	-	ALICANTE	no	no	no	no	no	no	no	positive	positive	pulmonary	initial	2015	2014-12-30	2015-06-08	2015-06-07	YES
G921	PRJEB38719	ERR4195634	144.1	L4.1.2.1	unique		53	female	LITHUANIA	2004	ALICANTE	no	no	no	no	no	no	no	positive	positive	pulmonary	initial	2015	2015-04-01	2015-06-16	2015-06-10	NO
G922	PRJEB38719	ERR4195635	162.0	L4.10	unique		31	female	SPAIN	-	ALICANTE	no	no	no	no	no	no	no	positive	positive	pulmonary	initial	2015	2014-12-22	2014-12-30	2014-12-30	NO
G925	PRJEB38719	ERR4195385	167.6	L4.1.2.1	unique		18	male	ALGERIA	2015	ALICANTE	no	no	no	no	no	no	no	negative	positive	pulmonary	initial	2015	2015-04-14	2015-06-16	2015-06-15	NO
G926	PRJEB38719	ERR4195386	138.3	L4.3.2	unique		81	male	SPAIN	-	ALICANTE	no	no	no	no	no	no	no	negative	positive	pulmonary	initial	2015	2015-06-20	2015-07-10	2015-07-10	NO
G937	PRJEB38719	ERR4195286	97.3	L4.10	unique		89	male	SPAIN	-	VALENCIA	no	no	no	no	no	no	no	negative	positive	pulmonary	initial	2015	2015-05-08	2015-09-24	2015-09-04	YES
G941	PRJEB38719	ERR4195415	114.5	L4.1.2.1	unique		41	female	SPAIN	-	VALENCIA	no	no	no	no	no	no	no	positive	positive	pulmonary	initial	2015	2015-02-05	2015-06-08	2015-06-09	YES
G947	PRJEB38719	ERR4195282	87.9	L4.10	unique		44	male	SPAIN	-	VALENCIA	yes	no		no	no	no	no	positive	positive	pulmonary	initial	2015	2015-01-01	2015-04-22	2015-04-23	YES
G950	PRJEB38719	ERR4195640	323.6	L4.1.2.1	unique		65	female	SPAIN	-	VALENCIA	no	no	no	yes	no	no	no	positive	positive	extrapulmonary	initial	2015	2014-07-20	2015-06-09	2015-06-09	YES
G960	PRJEB38719	ERR4195470	119.7	L4.3.2	unique		60	male	MOROCCO	2010	VALENCIA				no	no	no	no	negative	positive	pulmonary	initial	2015	2015-05-10	2015-05-28	2015-05-28	NO
G977	PRJEB38719	ERR4195287	96.4	L4.3.3	unique		23	male	MALI	2007	VALENCIA	no			no	no	no	no	positive	positive	pulmonary	initial	2015	2015-06-30	2015-07-28	2015-07-28	NO
G979	PRJEB38719	ERR4195409	162.0	L4.10	unique		66	male	SPAIN	-	ALICANTE	no	no	no	no	no	no	no	negative	positive	extrapulmonary	initial	2015	2015-03-23	2015-07-10	2015-07-10	YES
G981	PRJEB38719	ERR4195376	82.8	L2.2.1	unique		35	male	PAKISTAN	2007	VALENCIA	no	no	no	no		no	no	negative	positive	pulmonary	initial	2015	2014-09-01	1965-07-30	2015-07-29	YES
G983	PRJEB38719	ERR4195315	117.5	L3	unique		45	female	PAKISTAN	2005	ALICANTE	no	no	no	no	no	no	no	negative	positive	extrapulmonary	initial	2015	2015-03-03	2015-07-03	2015-07-03	YES
G987	PRJEB38719	ERR4195425	100.3	L4.10	unique		61	male	SPAIN	-	ALICANTE	no	no	no	no	no	no	no	positive	positive	extrapulmonary	initial	2015	2015-04-22	2015-05-28	2015-05-28	NO
G988	PRJEB38719	ERR4195645	173.5	L3	unique		33	female	NEPAL	2011	ALICANTE	no	no	no	no	no	no	no	negative	positive	pulmonary	initial	2015	2015-02-12	2015-06-30	2015-06-30	YES
G989	PRJEB38719	ERR4195646	103.1	L4.1.2.1	unique		66	male	RUMANIA	2015	ALICANTE						no	no	negative	positive	pulmonary		2015	2015-07-16	2015-07-20	2015-07-20	NO
G994m	PRJEB38719	ERR4195239	37.7	L1.2.2	unique		37	male	INDIA	2006	VALENCIA	yes	no	no	no	no	no	no	negative	positive	extrapulmonary	initial	2015	2015-04-23		2015-05-27	NO
G995	PRJEB38719	ERR4195240	103.6	L4.4.1.1	unique		45	male	COLOMBIA	2007	VALENCIA			no	no	yes	no	no	positive	positive	pulmonary	initial	2015	2015-03-05	2015-04-15	2015-04-15	NO
G1002	PRJEB38719	ERR4195343	205.4	L4.10	unique		30	female	RUMANIA	2009	VALENCIA	no	no	no	no	no	yes	no	negative	positive	pulmonary	initial	2015	2015-04-15	2015-06-22	2015-06-22	NO
G1009	PRJEB38719	ERR4195648	114.8	L4.4.1.1	unique		24	male	PARAGUAY	2013	VALENCIA	yes	yes	yes	no	no	no	no	negative	positive	extrapulmonary	initial	2015	2015-02-09	2015-05-19	2015-05-18	YES
G1010	PRJEB38719	ERR4195473	204.4	L4.1.2.1	unique		42	male	SPAIN	-	VALENCIA	yes	no	no	no	no	yes	no	positive	positive	pulmonary	initial	2015	2014-12-15	2015-06-17	2015-06-17	YES
G1017	PRJEB38719	ERR4195344	141.8	L4.3.1	unique		42	male	MOROCCO	1998	VALENCIA	no	no	no	no	no	no	no	negative	positive	extrapulmonary	initial	2015	2015-04-15	2015-07-24	2015-07-24	YES
G1019	PRJEB38719	ERR4195250	162.3	L4.1.2.1	unique		58	female	SPAIN	-	VALENCIA	no	no	no	no	no	no	no	positive	positive	pulmonary	initial	2015	2015-07-10	2015-09-11	2015-09-11	NO
G1020	PRJEB38719	ERR4195474	72.0	LBovis	unique		28	female	SPAIN	-	VALENCIA	no	no	no	no	no	no	yes	negative	positive	extrapulmonary	initial	2015	2014-10-15	2015-08-26	2015-08-26	YES
G1022	PRJEB38719	ERR4195653	115.3	L4.10	unique	NA	NA	NA	NA	NA	VALENCIA	NA	NA	NA	NA	NA	no	NA	NA	NA	NA	NA	NA	NA	NA	NA	NA
G1036	PRJEB38719	ERR4195452	152.3	L4.10	unique		16	male	SPAIN	-	VALENCIA	no	no	no	yes	no	yes	no	negative	positive	pulmonary	initial	2015	2015-05-05	2015-06-18	2015-06-17	NO
G1043	PRJEB38719	ERR4195655	154.0	L4	unique		50	female	BOLIVIA	2010	VALENCIA	no	no	no	no	no	yes	no	positive	positive	pulmonary		2015	2015-03-12	2015-07-17	2015-07-17	YES
G1044	PRJEB38719	ERR4195656	101.6	LBovis	unique		31	female	MOROCCO	2015	VALENCIA	no	no	no	no	yes	no	no	positive	positive	pulmonary	initial	2015	2015-03-24	2015-06-24	2015-06-24	YES
G1056	PRJEB38719	ERR4195657	130.1	L4.3.2	unique		86	male	SPAIN	-	VALENCIA	no	no	no	no	no	no	no	negative	positive	extrapulmonary		2015	2015-06-05	2015-07-07	2015-07-17	NO
G1057m	PRJEB38719	ERR4195658	197.1	L1.1.2	unique	NA	NA	NA	NA	NA	VALENCIA	NA	NA	NA	NA	NA	no	NA	NA	NA	NA	NA	NA	NA	NA	NA	NA
G1059m	PRJEB38719	ERR4195659	83.6	L4.1.2.1	unique		67	male	SPAIN	-	VALENCIA	yes	no	no	no	no	no	no	negative	positive	pulmonary	initial	2015	2015-05-01	2015-05-15	2015-05-15	NO
G1060	PRJEB38719	ERR4195660	63.4	L4.1.2.1	unique		27	female	SPAIN	-	VALENCIA	no	no	no	no	no	no	no	negative	positive	extrapulmonary	initial	2015	2015-04-01	2015-05-22	2015-05-21	NO
G1062m	PRJEB38719	ERR4195316	87.8	L4.3.4.2	unique	NA	NA	NA	NA	NA	VALENCIA	NA	NA	NA	NA	NA	no	NA	NA	NA	NA	NA	NA	NA	NA	NA	NA
G1063	PRJEB38719	ERR4195662	452.2	L4.1.2.1	unique		49	male	RUMANIA	2011	VALENCIA	yes	no	no	no	no	no	no	negative	positive	pulmonary	initial	2015	2015-05-02	2015-05-31	2015-05-31	NO
G1064	PRJEB38719	ERR4195663	146.2	L3	unique		54	male	PAKISTAN	2006	VALENCIA	no	no	no	no	no	yes	no	negative	positive	pulmonary	initial	2015	2015-06-01	2015-06-23	2015-06-23	NO
G1068	PRJEB38719	ERR4195252	138.3	L4.3.4.2	unique		89	male	SPAIN	-	CASTELLON	no	no	no	no	no	no	no	negative	positive	pulmonary	initial	2014	2013-10-01	2014-12-03	2014-12-03	YES
G1073	PRJEB38719	ERR4195475	116.5	L4.1.2.1	unique		85	male	SPAIN	-	CASTELLON	no	no	no	no	no	no	no	positive	positive	pulmonary	initial	2014	2014-10-07	2014-10-13	2014-10-13	NO
G1074	PRJEB38719	ERR4195666	401.3	L3	unique		38	male	PAKISTAN	2000	CASTELLON	no	no	no	no	no	no	no	positive	positive	pulmonary	previous treatment	2014	2014-10-27	2014-11-03	2014-11-03	NO
G1093m	PRJEB38719	ERR4195476	110.3	L4.1.1	unique		60	male	SPAIN	-	CASTELLON	no	no	no	no	no	no	no	positive	positive	pulmonary	initial	2015	2014-10-03	2015-01-09	2015-01-09	YES
G1098m	PRJEB38719	ERR4195668	164.7	L4.1.2.1	unique		29	female	RUMANIA	2014	CASTELLON	no	no	no	no	no	no	no	positive	positive	pulmonary	initial	2015	2015-01-17	2015-02-17	2015-02-17	NO
G1099	PRJEB29604	ERR2884617	110.7	L4.1.2.1	unique		35	female	RUMANIA	2003	CASTELLON	no	no	no	no	no	no	no	negative	positive	pulmonary	initial	2015	2014-08-01	2015-03-11	2015-03-11	YES
G1111	PRJEB38719	ERR4195478	119.8	LCaprae	unique		47	male	MOROCCO	1992	CASTELLON	no	no	no	no	no	no	no	negative	positive	pulmonary	initial	2015	2015-03-19	2015-04-20	2015-04-20	NO
G1113	PRJEB38719	ERR4195670	80.6	L4.1.2.1	unique		43	female	SPAIN	-	CASTELLON	no	no	no	no	no	no	no	positive	positive	pulmonary	initial	2015	2015-02-22	2015-04-16	2015-04-16	NO
G1125m	PRJEB38719	ERR4195479	115.0	L3	unique		35	male	PAKISTAN	2015	CASTELLON	no	no	no	no	no	no	no	positive	positive	pulmonary		2015	2015-04-28	2015-05-05	2015-05-05	NO
G1133m	PRJEB38719	ERR4195259	193.0	L4.3.2	unique		50	female	SPAIN	-	CASTELLON	no	no	no	no	no	no	no	positive	positive	pulmonary	initial	2015	2015-04-10	2015-05-15	2015-05-15	NO
G1137	PRJEB38719	ERR4195673	258.9	L4.1.2.1	unique		66	male	SPAIN	-	CASTELLON	no	no	no	no	no	no	no	positive	positive	pulmonary	initial	2015	2015-04-29	2015-05-31	2015-06-01	NO
G1144	PRJEB38719	ERR4195674	175.1	L4.1.2.1	unique		20	female	RUMANIA	2003	CASTELLON	no	no	no	no	no	no	no	positive	positive	pulmonary	initial	2015	2014-10-01	2015-06-12	2015-06-12	YES
G1152	PRJEB38719	ERR4195675	66.4	L4.1.2.1	unique		49	male	RUMANIA	2015	CASTELLON	no	no	no	no	no	no	no	positive	positive	pulmonary	initial	2015	2015-06-09	2015-07-10	2015-07-09	NO
G1158m	PRJEB38719	ERR4195325	121.3	L4.3.3	unique		36	male	RUMANIA	2002	CASTELLON	yes	no	no	no	no	yes	no	positive	positive	pulmonary	initial	2015	2015-07-01	2015-07-17	2015-07-17	NO
G1159	PRJEB38719	ERR4195677	118.0	L3	unique		33	male	PAKISTAN	2007	CASTELLON	no	no	no	no	no	no	no	positive	positive	pulmonary	initial	2015	2015-06-09	2015-08-06	2015-08-03	NO
G1160	PRJEB38719	ERR4195480	105.9	L4.10	unique		84	female	SPAIN	-	CASTELLON	no	no	no	no	no	no	yes	negative	positive	extrapulmonary	initial	2015	2015-05-06	2015-07-10	2015-07-09	NO
G1170	PRJEB38719	ERR4195481	123.0	L4.1.2.1	unique		59	male	SPAIN	-	CASTELLON	yes	no	no	no	no	yes	no	negative	positive	pulmonary	initial	2015	2015-08-01	2015-09-28	2015-09-25	NO
G1179	PRJEB38719	ERR4195680	149.7	LBovis	unique		21	male	MOROCCO	2012	ALICANTE	no	no	no	no	no	no	no	negative	positive	extrapulmonary	initial	2015	2015-08-31	2015-09-23	2015-09-22	NO
G1185	PRJEB38719	ERR4195681	156.1	L4.10	unique		61	male	UK	2003	VALENCIA	no	no	no	no	no	no	no	positive	positive	pulmonary	initial	2014	2014-10-26	2014-11-11	2014-11-10	NO
G1186	PRJEB38719	ERR4195682	201.5	L2.2.1	unique	NA	NA	NA	NA	NA	VALENCIA	NA	NA	NA	NA	NA	no	NA	NA	NA	NA	NA	NA	NA	NA	NA	NA
G1191	PRJEB38719	ERR4195233	124.5	L4.10	unique		78	male	SPAIN	-	VALENCIA	no	no		no	no	no	no	negative	positive	extrapulmonary	initial	2015	2014-08-23	2013-12-24	2014-12-24	YES
G1195	PRJEB38719	ERR4195272	118.8	L4.1.2.1	unique		25	male	RUMANIA	2008	VALENCIA		no	no	no	no	no	no	positive	positive	pulmonary	previous treatment	2015	2015-01-01	2015-02-12	2015-02-11	NO
G1198	PRJEB38719	ERR4195685	115.2	L4.1.2.1	unique		41	female	SPAIN	-	VALENCIA	no	no	no	no	no	no	yes	positive	positive	pulmonary	initial	2015	2015-04-01	2015-04-10	2015-04-10	NO
G1201	PRJEB38719	ERR4195323	115.8	L4.1.2.1	unique		41	female	SPAIN	-	VALENCIA	no	no	no	no	no	no	no	negative	positive	pulmonary	previous treatment	2015	2014-12-15	2015-07-28	2015-07-27	YES
G1202	PRJEB38719	ERR4195687	177.8	L4.3.4.1	unique		69	female	SPAIN	-	VALENCIA	no	no	no	no	no	no	no	negative	positive	extrapulmonary		2015	2015-07-22	2015-09-18	2015-07-30	NO
G1204	PRJEB38719	ERR4195688	199.5	L4.3.3	unique		39	female	PORTUGAL	2003	VALENCIA	no	no	no	no	no	no	no	negative	positive	extrapulmonary	initial	2015	2015-05-28	2015-08-11	2015-08-11	NO
G1237	PRJEB38719	ERR4195303	92.4	L5	unique		39	male	GUINEA EQU	2005	VALENCIA	no	no	yes	no	yes	no	no	negative	positive	extrapulmonary		2015	2015-07-15	2015-07-21	2015-07-21	NO
G1243	PRJEB38719	ERR4195484	158.0	L4.1.2.1	unique		58	male	MOROCCO	1990	VALENCIA	no	no	no	yes	no	no	no	positive	positive	pulmonary	initial	2015	2015-05-17	2015-07-21	2015-07-21	NO
G1270	PRJEB38719	ERR4195486	200.9	L4.3.3	unique	1918	31	female	RUSIA	2014	ALICANTE	no	no	no	no	yes	no	no	negative	positive	extrapulmonary	initial	2015	2015-08-03	2015-08-10	2015-08-10	NO
G1272	PRJEB38719	ERR4195692	118.3	L4.1.2.1	unique		41	male	FRANCE	2005	ALICANTE	yes	no	no	no	yes	no	no	positive	positive	extrapulmonary	initial	2015	2015-07-25	2015-10-01	2015-10-01	NO
G1277	PRJEB38719	ERR4195330	107.8	L4.1.2.1	unique		46	male	RUMANIA	2007	ALICANTE	yes	no	no	no	no	yes	no	positive	positive	pulmonary	initial	2015	2015-09-15	2015-10-07	2015-10-07	NO
G1279	PRJEB38719	ERR4195694	135.6	L4.10	unique		52	male	SPAIN	-	ALICANTE	no	no	no	no	no	no	no	negative	positive	pulmonary	initial	2015	2015-11-02	2015-12-01	2015-12-01	NO
G1280	PRJEB38719	ERR4195288	101.2	L4.10	unique		23	female	SPAIN	-	VALENCIA	no	no	no	no	no	no	no	positive	positive	pulmonary	initial	2015	2015-05-29	2015-07-08	2015-06-30	NO
G1286	PRJEB38719	ERR4195448	72.9	L4.10	unique		93	female	SPAIN	-	VALENCIA	no	no	no	no	no	no	no	negative	positive	pulmonary	initial	2015	2015-07-15	2015-08-28	2015-08-18	NO
G1293	PRJEB38719	ERR4195487	142.1	L4.10	unique		63	male	SPAIN	-	VALENCIA	no	no	no	no	no	no	no	negative	positive	pulmonary	initial	2015	2015-03-24	2015-09-04	2015-08-28	YES
G1294	PRJEB38719	ERR4195698	154.7	LBovis	unique		27	female	MOROCCO	2009	ALICANTE	no	no	no	no	no	no	no	negative	positive	pulmonary	initial	2015	2015-05-15	2015-06-25	2015-06-25	NO
G1296	PRJEB38719	ERR4195699	160.1	L4.3.2	unique		46	female	SPAIN	-	VALENCIA	no	no	no			no	no	positive	positive	pulmonary	previous treatment	2015	2015-07-13	2015-08-21	2015-08-17	NO
G1312	PRJEB38719	ERR4195255	155.1	L4.3.2	unique		72	male	SPAIN	-	VALENCIA	no	no	no	yes	no	no	no	negative	positive	pulmonary	initial	2015	2015-10-08	2015-11-11	2015-11-11	NO
G1315	PRJEB38719	ERR4195292	170.3	L4.1.2.1	unique		84	female	SPAIN	-	VALENCIA	no	no	no	no	no	no	no	negative	positive	pulmonary	initial	2015	2015-12-14	2015-12-14	2015-12-14	NO
G1321	PRJEB38719	ERR4195338	202.5	L4.3.4.1	unique		21	female	VENEZUELA	2003	VALENCIA	no	no	no	no	no	no	no	positive	positive	pulmonary	initial	2015	2015-09-15	2015-10-18	2015-10-18	NO
G1323	PRJEB38719	ERR4195253	121.3	L4.3.2	unique		59	male	SPAIN	-	VALENCIA	yes	no	no	no	no	no	no	negative	positive	pulmonary	initial	2015	2015-09-17	2015-12-15	2015-12-15	NO
G1325	PRJEB38719	ERR4195703	202.7	L4.3.2	unique		59	female	BANGLADESH	1982	VALENCIA	no	no	no	no	no	no	no	positive	positive	pulmonary	initial	2015	2015-06-26	2015-09-09	2015-10-08	YES
G1327	PRJEB38719	ERR4195704	195.4	L4.3.3	unique		88	female	SPAIN	-	VALENCIA	no	no	no	yes	no	no	no	positive	positive	pulmonary	initial	2015	2015-10-10	2015-11-06	2015-11-06	NO
G1328	PRJEB38719	ERR4195705	72.0	L4.3.2	unique		48	female	SPAIN	-	VALENCIA	no	no	no	no	no	no	no	negative	positive	extrapulmonary	initial	2016	2015-10-21	2016-02-19	2015-11-10	NO
G1329	PRJEB38719	ERR4195706	163.1	L4.3.2	unique		67	male	SPAIN	-	VALENCIA	yes	no	no	no	no	no	no	negative	positive	pulmonary	initial	2016	2015-09-12	2016-02-16	2016-01-11	YES
G1340	PRJEB38719	ERR4195449	91.2	L2.2.1	unique		20	female	SPAIN	-	VALENCIA	no	no	no	no	no	no	no	negative	positive	pulmonary	initial	2015	2015-10-19	2015-11-28	2015-11-25	NO
G1344	PRJEB38719	ERR4195708	137.7	L4.3.4.1	unique		22	male	PORTUGAL	2015	VALENCIA	no	no	no	no	no	no	no	positive	positive	pulmonary	initial	2015	2015-11-23	2015-12-02	2015-12-02	NO
G1347	PRJEB38719	ERR4195709	67.7	L4.1.2.1	unique		84	male	SPAIN	-	VALENCIA	no	no	no	no	no	no	no	positive	positive	pulmonary	initial	2015	2015-09-03	2015-11-20	2015-11-17	NO
G1349	PRJEB38719	ERR4195710	140.1	L4.1.1	unique		43	male	SPAIN	-	ALICANTE			yes	no	yes	NA	no	positive	positive	pulmonary	previous treatment	2016	2015-09-16	2016-01-08	2016-01-08	YES
G1352	PRJEB38719	ERR4195395	126.7	LBovis	unique		19	male	MOROCCO	2005	ALICANTE	no	no	no	no		no	no	negative	positive	extrapulmonary	initial	2014	2013-10-03	2014-04-10	2014-03-20	YES
G1353m	PRJEB38719	ERR4195712	184.1	L4.3.2	unique		77	male	SPAIN	-	ALICANTE	no	no	no	no	no	no	no	positive	positive	extrapulmonary	initial	2014	2014-01-15	2014-04-04	2014-04-03	NO
G1354	PRJEB38719	ERR4195713	82.5	L4.1.2.1	unique		34	male	MOROCCO	2002	ALICANTE	no	no	no	no	no	no	no	positive	positive	pulmonary	initial	2014	2014-07-09	2014-07-14	2014-07-14	NO
G1356	PRJEB38719	ERR4195258	92.8	L4.1.2.1	unique		27	male	MOROCCO	2010	ALICANTE	no	no	no	no	no	no	no	negative	positive	extrapulmonary	initial	2015	2015-01-27	2015-03-13	2015-03-13	NO
G1357m	PRJEB38719	ERR4195715	112.8	L4.1.2.1	unique		75	female	SPAIN	-	ALICANTE	no	no	no	no	no	no	no	negative	positive	pulmonary	initial	2015	2015-04-04	2015-05-29	2015-05-26	NO
G1358	PRJEB38719	ERR4195716	125.3	L4.1.2.1	unique		66	male	SPAIN	-	ALICANTE	no	no	no	no		no	no	negative	positive	pulmonary	initial	2015	2015-09-19	2015-11-25	2015-11-24	NO
G1362	PRJEB38719	ERR4195318	159.4	L1.1.2	unique		52	male	INDIA	2005	ALICANTE	no	no	no	no	no	no	no	not done	positive	extrapulmonary	initial	2015	2015-06-01	2015-12-04	2015-12-04	YES
G1364	PRJEB38719	ERR4195718	96.3	L4.1.2.1	unique		36	male	SPAIN	-	ALICANTE	no	no	no	no	no	no	no	positive	positive	pulmonary	initial	2015	2015-06-01	2015-12-03	2015-12-03	YES
G1365	PRJEB38719	ERR4195719	127.6	L4.4.1.1	unique		36	male	SPAIN	-	ALICANTE	no	no	no	no	no	no	no	positive	positive	pulmonary	initial	2015	2015-05-20	2015-08-28	2015-09-01	YES
G1366	PRJEB38719	ERR4195720	116.8	L4.3.2	unique		32	male	SPAIN	-	ALICANTE	no	no	no	no	no	no	no	negative	positive	pulmonary	initial	2015	2015-06-15	2015-09-02	2015-09-18	YES
G1367	PRJEB38719	ERR4195721	113.6	L4.1.2.1	unique		50	male	MOROCCO	9999	ALICANTE	yes	no	no	no	no	no	no	negative	positive	pulmonary	initial	2015	2015-11-25	2015-12-16	2015-11-25	NO
G1368	PRJEB38719	ERR4195722	178.5	L4.3.4.2	unique		79	female	SPAIN	-	ALICANTE	no	no	no	no		no	no	negative	positive	pulmonary		2015	2015-11-04	2015-12-16	2015-12-14	NO
G1369	PRJEB38719	ERR4195723	260.9	L4.10	unique		51	male	SPAIN	-	ALICANTE	yes	yes	no	no	yes	no	no	positive	positive	pulmonary	initial	2016	2015-12-01	2016-01-07	2016-01-07	NO
G1374	PRJEB38719	ERR4195489	135.1	L3.1.2	unique		24	female	PAKISTAN	2012	VALENCIA		no	no	no	no	no	no	negative	positive	extrapulmonary	initial	2016	2015-12-07	2015-12-15	2015-12-15	NO
G1375	PRJEB38719	ERR4195725	203.1	L4.3.4.2	unique		55	female	SPAIN	-	VALENCIA	no	no	no	no		no	no	negative	positive	pulmonary	initial	2016	2015-12-03	2015-12-30	2015-12-30	NO
G1376	PRJEB38719	ERR4195726	97.0	L4.3.3	unique		22	male	HONDURAS	2012	VALENCIA	no	no	no	no	yes	no	no	negative	positive	pulmonary	initial	2016	2014-12-08	2016-04-06	2015-12-28	YES
G1378	PRJEB38719	ERR4195294	134.5	L4.10	unique		59	male	SPAIN	-	VALENCIA	no	no	no	no	no	no	no	positive	positive	pulmonary	initial	2015	2015-11-02	2015-11-03	2015-11-03	NO
G1379	PRJEB38719	ERR4195728	203.5	L4.3.3	unique		36	female	BRAZIL	2015	VALENCIA	no		no	no	yes	no	no	negative	positive	extrapulmonary		2016	2015-12-31	2016-01-07	2016-01-07	NO
G1403	PRJEB38719	ERR4195295	119.6	L4.3.4.2	unique		20	male	SENEGAL	2012	VALENCIA			no	no		no	no	positive	positive	pulmonary		2015	2015-11-17	2015-11-18	2015-11-18	NO
G1404	PRJEB38719	ERR4195730	140.7	L4.10	unique		31	male	RUMANIA	2010	VALENCIA	no	no	no	no	no	no	no	negative	positive	extrapulmonary	initial	2015	2015-10-29	2015-11-23	2015-11-23	NO
G1407	PRJEB38719	ERR4195731	150.5	L4.3.3	unique		51	male	MOROCCO	1990	CASTELLON	no	no	no	no	no	no	no	positive	positive	pulmonary		2015	2015-03-05	2015-11-10	2015-11-10	YES
G1422	PRJEB38719	ERR4195354	144.8	L4.1.2.1	unique		53	male	SPAIN	-	VALENCIA		yes	yes	no	no	yes	no	positive	positive	pulmonary		2015	2015-12-18	2015-12-24	2015-12-24	NO
G1429	PRJEB38719	ERR4195447	89.0	L4.10	unique	NA	NA	NA	NA	NA	VALENCIA	NA	NA	NA	NA	NA	no	NA	NA	NA	NA	NA	NA	NA	NA	NA	NA
G1437	PRJEB38719	ERR4195308	112.6	L4.3.3	unique		38	male	MOROCCO	2011	VALENCIA	no	no	no	no	no	no	no	positive	positive	pulmonary	initial	2015	2015-08-25	2015-11-25	2015-11-25	YES
G1447	PRJEB38719	ERR4195351	79.6	L4.3.4.2	unique		25	female	RUMANIA	2007	ALICANTE	no	no	no	no	no	no	no	positive	positive	pulmonary	initial	2016	2015-09-17	2016-02-17	2016-02-16	YES
G1452	PRJEB38719	ERR4195736	131.9	L4.3.2	unique	1971	36	female	SPAIN	-	VALENCIA	no	no	no	no	no	no	no	positive	positive	pulmonary	initial	2015	2015-04-03	2015-10-03	2015-09-28	YES
G1458	PRJEB38719	ERR4195737	155.0	L4.10	unique		34	male	SPAIN	-	VALENCIA	yes		no	no	no	no	no	positive	positive	pulmonary	initial	2015	2015-12-24	2015-12-29	2015-12-29	NO
G1459	PRJEB38719	ERR4195738	123.6	L4.10	unique		37	male	RUMANIA	2008	VALENCIA	yes	no	no	no	no	no	no	negative	positive	extrapulmonary	initial	2016	2015-10-03	2015-12-18	2015-12-18	NO
G1465	PRJEB38719	ERR4195407	111.5	L4.3.2	unique		41	male	MOROCCO	2002	VALENCIA	no	no	no	no		no	no	positive	positive	pulmonary		2016	2016-01-29	2016-03-01	2016-02-29	NO
G1467	PRJEB38719	ERR4195740	104.7	L4.10	unique		83	male	SPAIN	-	ALICANTE	no	no	no	no	no	no	no	positive	positive	extrapulmonary	initial	2016	2015-12-24	2016-03-08	2016-03-07	NO
G1468	PRJEB38719	ERR4195741	108.3	L2.2.1.1	unique		50	male	CHINA	1997	ALICANTE	no	no	no	no		no	no	positive	positive	pulmonary	initial	2016	2015-08-01	2016-02-17	2016-02-17	YES
G1471	PRJEB38719	ERR4195416	156.6	L4.1.2.1	unique	NA	NA	NA	NA	NA	ALICANTE	NA	NA	NA	NA	NA	no	NA	NA	NA	NA	NA	NA	NA	NA	NA	NA
G1474	PRJEB38719	ERR4195743	111.3	L4.1.2.1	unique	NA	NA	NA	NA	NA	ALICANTE	NA	NA	NA	NA	NA	no	NA	NA	NA	NA	NA	NA	NA	NA	NA	NA
G1475	PRJEB38719	ERR4195744	90.3	L3	unique	NA	NA	NA	NA	NA	ALICANTE	NA	NA	NA	NA	NA	no	NA	NA	NA	NA	NA	NA	NA	NA	NA	NA
G1487	PRJEB38719	ERR4195414	105.6	L4.10	unique		50	male	SPAIN	-	VALENCIA	yes	yes	no	no	no	no	no	positive	positive	pulmonary		2016	2016-03-02	2016-03-04	2016-03-04	NO
G1489	PRJEB38719	ERR4195746	120.1	L4.10	unique	2160	33	male	PAKISTAN	2014	VALENCIA	no	no	no	no	no	no	no	positive	positive	pulmonary	initial	2016	2016-02-01	2016-03-02	2016-03-02	NO
G1492	PRJEB38719	ERR4195491	144.7	L4.6.2.2	unique		35	male	GUINEA EQU	2016	VALENCIA	no	yes	no	no	no	no	no	positive	positive	extrapulmonary		2016	2016-02-10	2016-02-12	2016-02-12	NO
G1497	PRJEB38719	ERR4195428	117.5	L4.10	unique		82	male	SPAIN	-	ALICANTE	no	no	no	no	no	no	no	negative	positive	pulmonary	initial	2016	2016-01-09		2016-02-12	NO
G1498	PRJEB38719	ERR4195749	150.7	L4.3.1	unique	2119	18	female	MOROCCO	2008	ALICANTE	no	no	no	no	no	no	no	positive	positive	extrapulmonary	initial	2016	2015-09-11	2016-01-20	2016-01-19	YES
G1499	PRJEB38719	ERR4195750	134.9	L4.10	unique	2119	43	female	MOROCCO	2005	ALICANTE	no	no	no	no		no	no	negative	positive	extrapulmonary	initial	2016	2015-08-12	2016-04-15	2016-04-01	YES
G1500FE27	PRJEB38719	ERR4195751	44.0	L4.5	unique		37	female	PAKISTAN	2010	VALENCIA	no	no	no	no	no	no	no	negative	positive	extrapulmonary	initial	2015	2015-05-20	2015-07-01	2015-07-01	NO
G1501FE36	PRJEB38719	ERR4195752	69.3	L4.3.3	unique		51	male	LITHUANIA	2013	VALENCIA		no	no	no	no	no	no	negative	positive	pulmonary	initial	2015	2014-11-30	2015-03-17	2015-03-16	YES
G1502FE05	PRJEB38719	ERR4195753	43.0	L2.2.1	unique		36	female	UKRAINE	2012	VALENCIA			no	no	yes	no	no	positive	positive	pulmonary	initial	2015	2015-10-20	2015-10-30	2015-10-30	NO
G1509	PRJEB38719	ERR4195382	80.9	L4.3.4.2	unique		38	male	SENEGAL	2007	VALENCIA	no	no	no	yes	no	no	no	positive	positive	pulmonary	initial	2016	2015-12-09	2016-01-12	2016-01-13	NO
G1512	PRJEB38719	ERR4195493	87.4	L4.1.2.1	unique		40	male	RUMANIA	2010	VALENCIA		no	no	no	no	yes	no	negative	positive	pulmonary	initial	2015	2015-12-21	2016-04-11	2015-12-22	NO
G1516	PRJEB38719	ERR4195278	93.2	L4.1.2.1	unique		45	female	SPAIN	-	VALENCIA	yes	no	no	no	no	no	no	positive	positive	extrapulmonary	initial	2016	2016-01-04	2016-03-08	2016-02-18	NO
G1520	PRJEB38719	ERR4195334	136.3	L4.1.2.1	unique		49	male	RUMANIA	2006	VALENCIA	yes	no	no	no	no	yes	no	positive	positive	pulmonary	previous treatment	2016	2016-01-15	2016-02-16	2016-02-16	NO
G1521	PRJEB38719	ERR4195758	189.6	L4.1.1.3	unique		53	male	SPAIN	-	VALENCIA		no	no	yes	no	no	no	positive	positive	pulmonary	initial	2016	2015-08-15	2016-02-17	2016-02-19	YES
G1522	PRJEB38719	ERR4195759	62.4	L4.1.2.1	unique		4	male	SPAIN	-	ALICANTE	no	no	no	no	no	no	no	negative	positive	pulmonary	initial	2016	2016-01-23	2016-02-02	2016-01-28	NO
G1523	PRJEB38719	ERR4195760	39.9	L4.1.2.1	unique		79	male	SPAIN	-	VALENCIA	no	no	no	yes	no	no	no	negative	positive	pulmonary	initial	2016	2015-12-01	2016-04-12	2016-04-12	YES
G1526	PRJEB38719	ERR4195380	130.1	L3	unique		44	male	PAKISTAN	2013	VALENCIA			no	no	no	no	no	negative	positive	pulmonary	initial	2016	2016-02-29	2016-04-27	2016-04-25	NO
G1528	PRJEB38719	ERR4195762	82.1	L4.1.2.1	unique		51	female	BOLIVIA	2004	ALICANTE	no	no	no	no	no	no	no	negative	positive	pulmonary		2016	2015-08-25	2016-02-11	2016-01-08	YES
G1530	PRJEB38719	ERR4195763	118.3	L4.10	unique		26	male	CZECH REP	2010	VALENCIA	yes	no	no	no	no	no	no	positive	positive	pulmonary	initial	2016	2016-03-08	2016-04-06	2016-04-05	NO
G1532	PRJEB38719	ERR4195764	83.1	L4.1.1.1	unique		56	male	SPAIN	-	VALENCIA	yes	yes		yes	no	no	no	positive	positive	pulmonary	initial	2016	2016-01-08	2016-04-09	2016-04-08	YES
G1536	PRJEB38719	ERR4195377	215.7	L4.3.4.2	unique		37	female	SPAIN	-	VALENCIA	no	no	no	no	no	no	no	negative	positive	pulmonary	initial	2016	2016-01-01	2016-04-22	2016-04-22	YES
G1538	PRJEB38719	ERR4195269	40.3	L4.1.2.1	unique		52	female	SPAIN	-	VALENCIA	no	no	no	no		no	no	positive	positive	pulmonary	initial	2016	2015-11-25	2016-04-26	2016-04-26	YES
G1539	PRJEB38719	ERR4195767	73.3	L4.1.2.1	unique		61	male	RUMANIA	2001	VALENCIA	no	no	no	no		no	no	negative	positive	pulmonary	initial	2016	2016-03-18	2016-06-01	2016-06-01	NO
G1542	PRJEB38719	ERR4195768	78.8	L4.3.2	unique		67	female	SPAIN	-	VALENCIA	yes		no	no		no	no	positive	positive	pulmonary	initial	2016	2016-04-20	2016-05-03	2016-05-06	NO
G1545	PRJEB38719	ERR4195410	130.7	L4.1.2.1	unique		60	male	RUMANIA	2007	CASTELLON	yes	no	yes	no	no	no	no	positive	positive	pulmonary		2015	2015-10-16	2015-11-01	2015-10-30	NO
G1546	PRJEB38719	ERR4195770	146.8	L4.1.2.1	unique		23	male	RUMANIA	2015	CASTELLON	yes	yes	yes	no	no	yes	no	positive	positive	pulmonary	initial	2015	2015-12-04	2015-12-11	2015-12-11	NO
G1557	PRJEB38719	ERR4195771	152.7	L4.10	unique		31	female	RUMANIA	2003	CASTELLON	no	no	no	no	no	no	no	positive	positive	pulmonary	initial	2015	2015-09-07	2015-11-10	2015-11-10	NO
G1568	PRJEB38719	ERR4195224	208.4	L4.3.2	unique		21	male	SPAIN	-	VALENCIA		no	no	yes		no	no	positive	positive	pulmonary	initial	2016	2016-02-07	2016-04-19	2016-04-12	NO
G1573	PRJEB38719	ERR4195442	157.8	L4.1.1.3	unique		56	female	SPAIN	-	VALENCIA			no	yes		no	no	positive	positive	pulmonary	initial	2016	2016-01-23	2016-02-11	2016-02-11	NO
G1579	PRJEB38719	ERR4195393	66.2	L4.1.1.3	unique		54	male	SPAIN	-	VALENCIA	no	no	no	no	no	no	yes	negative	positive	pulmonary	initial	2016	2016-01-14	2016-02-23	2016-02-22	NO
G1580	PRJEB38719	ERR4195774	93.5	L3	unique		23	female	PAKISTAN	2016	VALENCIA	no	no	no	no	no	no	no	positive	positive	pulmonary	initial	2016	2016-02-01	2016-02-01	2016-02-01	NO
G1581	PRJEB38719	ERR4195775	81.8	L4.3.2	unique		43	male	SPAIN	-	VALENCIA	no	no	no	no	no	no	no	positive	positive	pulmonary	initial	2016	2016-02-07	2016-04-08	2016-04-08	NO
G1582	PRJEB38719	ERR4195776	98.6	L4.1.2.1	unique	NA	NA	NA	NA	NA	VALENCIA	NA	NA	NA	NA	NA	no	NA	NA	NA	NA	NA	NA	NA	NA	NA	NA
G1583	PRJEB38719	ERR4195777	86.4	L4.10	unique		84	male	SPAIN	-	VALENCIA	no	no	no	yes	no	no	no	positive	positive	pulmonary	initial	2016	2016-04-21	2016-04-25	2016-04-25	NO
G1586	PRJEB38719	ERR4195374	354.6	L4.3.3	unique		50	male	ARGENTINA	2000	VALENCIA	yes	no	no	no	yes	no	no	positive	positive	pulmonary	initial	2016	2016-05-10	2016-05-19	2016-05-17	NO
G1607	PRJEB38719	ERR4195389	105.3	L4.1.2.1	unique		53	female	CHINA	2015	VALENCIA	no	no	no	no	no	no	no	negative	positive	extrapulmonary	initial	2016	2016-03-10	2016-05-10	2016-04-30	NO
G1609	PRJEB38719	ERR4195780	107.3	L4.1.2.1	unique		39	male	BOLIVIA	2007	VALENCIA	no	no	no	no	no	no	no	negative	positive	pulmonary	initial	2016	2016-04-12	2016-04-15	2016-04-15	NO
G1611	PRJEB38719	ERR4195781	85.2	L4.1.2.1	unique	2187	22	male	SPAIN	-	VALENCIA	no	no	no	no	no	no	no	positive	positive	pulmonary	initial	2016	2016-04-01	2016-06-08	2016-06-08	NO
G1612	PRJEB38719	ERR4195782	121.7	L4.1.2.1	unique		81	male	SPAIN	-	ALICANTE	no	no	no	no	no	no	no	negative	positive	extrapulmonary	initial	2016	2015-12-14	2016-01-21	2016-01-19	NO
G1614	PRJEB38719	ERR4195365	90.9	L4.10	unique		45	male	SPAIN	-	ALICANTE	no	no	no	no	no	no	no	negative	positive	pulmonary	initial	2016	2016-03-16	2016-06-21	2016-06-20	YES
G1618	PRJEB38719	ERR4195388	76.2	L4.3.2	unique		38	male	SPAIN	-	ALICANTE	no	no	no	no	no	no	no	negative	positive	pulmonary	initial	2016	2016-07-02	2016-07-08	2016-07-07	NO
G1631	PRJEB38719	ERR4195440	90.7	L4.4.1.1	unique		17	female	MOROCCO	2010	ALICANTE	no	no	no	no	no	no	no	positive	positive	pulmonary	initial	2016	2016-04-25	2016-05-03	2016-05-03	NO
G1633	PRJEB38719	ERR4195441	168.4	L4.3.2	unique		45	female	PERU	2016	VALENCIA	no	no	no	no	no	no	no	positive	positive	pulmonary	initial	2016	2016-04-01	2016-06-08	2016-06-07	NO
G1637	PRJEB38719	ERR4195424	106.6	L4.1.1	unique		48	male	SPAIN	-	VALENCIA	yes	no	no	no	no	no	no	positive	positive	pulmonary	initial	2016	2016-06-03	2016-06-16	2016-06-16	NO
G1646	PRJEB38719	ERR4195345	126.1	L4.1.2.1	unique		42	male	RUMANIA	2007	VALENCIA	yes	no	no	no	no	no	no	positive	positive	pulmonary	initial	2016	2016-07-01	2016-07-06	2016-07-06	NO
G1651	PRJEB38719	ERR4195494	81.8	L4.3.3	unique		59	male	SPAIN	-	VALENCIA	no	no	no	no	no	no	no	positive	positive	pulmonary	initial	2016	2016-03-01	2016-08-17	2016-08-17	YES
G1652	PRJEB38719	ERR4195788	110.8	L4.3.4.1	unique		34	female	SPAIN	-	VALENCIA	no	no	no	no	no	no	no	negative	positive	pulmonary	initial	2016	2016-07-18	2016-07-29	2016-07-29	NO
G1654	PRJEB38719	ERR4195789	269.0	L4.10	unique		48	male	SPAIN	-	VALENCIA	yes	no	no	no		no	no	positive	positive	pulmonary	initial	2016	2016-04-10	2016-08-12	2016-08-10	YES
G1657	PRJEB38719	ERR4195790	56.9	L4.1.2.1	unique		79	female	SPAIN	-	VALENCIA	no	no	no	yes	no	no	no	positive	positive	extrapulmonary	initial	2016	2016-08-06	2016-08-22	2016-08-21	NO
G1660	PRJEB38719	ERR4195495	172.9	L4.5	unique		32	male	PAKISTAN	2005	VALENCIA	no	no	no	no	no	no	no	negative	positive	pulmonary	initial	2016	2016-06-07	2016-06-15	2016-06-15	NO
G1663	PRJEB38719	ERR4195362	89.3	L4.3.3	unique		33	female	BOLIVIA	2006	VALENCIA	no	no	no	no	no	no	no	negative	positive	extrapulmonary	initial	2016	2016-05-06	2016-07-05	2016-07-05	NO
G1664	PRJEB38719	ERR4195793	99.5	L4.1.2.1	unique	2165	37	female	SPAIN	-	VALENCIA	no	no	no	no	no	no	no	negative	positive	pulmonary	initial	2016	2016-03-11	2016-05-17	2016-05-17	NO
G1668	PRJEB38719	ERR4195794	81.0	L3	unique		33	male	PAKISTAN	2016	VALENCIA	no	no	no	no		no	no	positive	positive	pulmonary		2016	2016-05-28	2016-06-23	2016-06-23	NO
G1671	PRJEB38719	ERR4195795	159.1	L4.10	unique		53	male	SPAIN	-	VALENCIA	no	no	no	no	no	no	no	positive	positive	extrapulmonary		2016	2016-06-28	2016-07-15	2016-07-08	NO
G1672	PRJEB38719	ERR4195796	180.5	L4.1.2.1	unique		50	male	GUINEA EQU	1996	VALENCIA	no	no	no	yes	no	no	no	positive	positive	pulmonary	previous treatment	2016	2016-01-11	2016-06-07	2016-06-07	YES
G1673	PRJEB38719	ERR4195797	167.5	L3	unique		49	male	SPAIN	-	ALICANTE	yes	no	no	no	no	no	no	positive	positive	pulmonary	initial	2015	2015-10-08	2015-11-10	2015-11-10	NO
G1675	PRJEB38719	ERR4195798	109.9	L4.1.1	unique		50	male	SPAIN	-	VALENCIA	yes	no	no	no	no	no	no	positive	positive	pulmonary	initial	2016	2016-05-20	2016-08-26	2016-08-26	YES
G1678	PRJEB38719	ERR4195799	128.9	L4.1.2.1	unique		27	male	COLOMBIA	2016	VALENCIA	no		no			no	no	positive	positive	pulmonary	initial	2016	2016-05-01	2016-08-04	2016-08-04	YES
G1683	PRJEB38719	ERR4195346	134.7	L4.3.2	unique		35	female	MOROCCO	2000	ALICANTE	no	no	no	no	no	NA	no	negative	positive	extrapulmonary	initial	2016	2016-04-15	2016-07-06	2016-07-07	NO
G1684	PRJEB38719	ERR4195801	169.9	L4.1.2.1	unique		82	male	SPAIN	-	ALICANTE	yes	no	no	yes	no	no	no	negative	positive	pulmonary	initial	2016		2016-10-07	2016-08-03
G1685	PRJEB38719	ERR4195802	191.2	L4.3.2	unique		37	female	SPAIN	-	ALICANTE		no	no	no	no	no	no	negative	positive	pulmonary	initial	2016	2016-08-06	2016-08-12	2016-08-12	NO
G1686	PRJEB38719	ERR4195803	92.7	L4.1.2.1	unique		51	female	SPAIN	-	ALICANTE	yes	yes	no	no	no	no	no	negative	positive	pulmonary	initial	2016	2016-07-09	2016-09-14	2016-09-29	NO
G1687	PRJEB38719	ERR4195804	265.1	L4.10	unique		49	female	SPAIN	-	ALICANTE	no	no	no	no	no	no	no	positive	positive	pulmonary	initial	2016	2015-10-19	2016-09-14	2016-09-13	YES
G1694	PRJEB38719	ERR4195363	77.2	L3	unique		52	male	PAKISTAN	2009	VALENCIA	no	no		yes	no	no	no	negative	positive	extrapulmonary		2016	2016-04-22	2016-06-22	2016-06-19	NO
G1695	PRJEB38719	ERR4195806	132.5	L3	unique		52	male	PAKISTAN	2005	VALENCIA	no	no	no	no	no	no	no	negative	positive	extrapulmonary	initial	2016	2016-05-10	2016-06-14	2016-06-09	NO
G1697	PRJEB38719	ERR4195807	163.4	L4.1.2	unique		43	male	SPAIN	-	VALENCIA	yes	no	no	no	yes	no	no	positive	positive	pulmonary		2016	2015-12-23	2016-06-21	2016-06-21	YES
G1700	PRJEB38719	ERR4195808	197.7	L4.3.4.2	unique		60	male	SPAIN	-	VALENCIA	no	no	no	no	no	no	no	positive	positive	extrapulmonary	initial	2016	2015-12-15	2016-06-08	2016-06-07	YES
G1702	PRJEB38719	ERR4195809	56.1	L4.3.2	unique		42	female	BOLIVIA	2002	VALENCIA	no	no	no	no		no	no	negative	positive	pulmonary	initial	2016	2016-08-12	2016-09-17	2016-08-19	NO
G1703	PRJEB38719	ERR4195810	62.5	L4.1.2.1	unique		82	female	SPAIN	-	VALENCIA	no	no	no	no	no	no	no	negative	positive	extrapulmonary	initial	2016	2016-09-16	2016-09-16	2016-09-16	NO
G1705	PRJEB38719	ERR4195390	208.5	L4.6.2.2	unique		22	female	NIGERIA	2016	VALENCIA		no	no	no	no	no	no	positive	positive	pulmonary	initial	2016	2016-09-01	2016-09-15	2016-09-15	NO
G1706	PRJEB38719	ERR4195812	177.5	LBovis	unique	NA	NA	NA	NA	NA	VALENCIA	NA	NA	NA	NA	NA	no	NA	NA	NA	NA	NA	NA	NA	NA	NA	NA
G1711	PRJEB38719	ERR4195369	77.4	L4.1.2.1	unique	2542	27	female	SPAIN	-	VALENCIA	no	no	no	no	no	no	no	positive	positive	pulmonary	initial	2016	2016-03-15	2016-06-16	2016-06-16	YES
G1713	PRJEB38719	ERR4195814	178.3	L4.1.2.1	unique		49	female	SPAIN	-	VALENCIA	no	no	no	no	no	no	no	positive	positive	pulmonary	initial	2016	2016-05-27	2016-06-27	2016-06-27	NO
G1716	PRJEB38719	ERR4195375	39.2	L4.1.2.1	unique		89	male	SPAIN	-	VALENCIA	no	no	no	no	no	no	no	positive	positive	extrapulmonary	initial	2016	2016-06-01	2016-07-26	2016-07-25	NO
G1717	PRJEB38719	ERR4195816	129.9	L4.1.2.1	unique		50	male	SPAIN	-	VALENCIA			yes	no	yes	NA	no	negative	positive	pulmonary	initial	2014		2014-04-17	2014-04-17
G1718	PRJEB38719	ERR4195817	63.7	L4.1.2	unique		42	male	SENEGAL	2000	VALENCIA	no	no	no	no	no	no	no	negative	positive	pulmonary	initial	2016	2016-06-01	2016-07-18	2016-06-30	NO
G1725	PRJEB38719	ERR4195436	159.2	L4.10	unique		32	female	MOROCCO	2012	CASTELLON	no	no	no	no	no	no	no	negative	positive	pulmonary	initial	2016	2016-07-13	2016-07-26	2016-07-26	NO
G1726	PRJEB38719	ERR4195819	2400-09-01	L4.3.4.2	unique		81	female	SPAIN	-	CASTELLON	no	no	no	no	no	no	no	negative	positive	pulmonary	initial	2016	2016-06-01	2016-08-17	2016-08-17	NO
G1727	PRJEB38719	ERR4195820	216.0	L4.3.1	unique		58	male	MOROCCO	2000	CASTELLON	no	no	yes	no	no	yes	no	positive	positive	pulmonary	initial	2016	2015-12-25	2016-04-25	2016-04-25	YES
G1728	PRJEB38719	ERR4195821	161.1	L4.10	unique		78	male	SPAIN	-	CASTELLON	no	no	no	yes	no	no	no	negative	positive	extrapulmonary	initial	2016	2015-07-01	2016-07-29	2016-07-29	YES
G1731	PRJEB38719	ERR4195822	247.3	L4.10	unique		53	male	SPAIN	-	CASTELLON	yes	no		yes	no	yes	no	negative	positive	extrapulmonary	initial	2016	2015-12-12	2016-01-02	2016-01-02	NO
G1733	PRJEB38719	ERR4195823	192.6	L4.2.1	unique		30	female	RUMANIA	2011	CASTELLON	no	no	no	no	no	no	no	positive	positive	pulmonary	initial	2016	2016-05-02	2016-05-21	2016-05-21	NO
G1739	PRJEB38719	ERR4195451	102.2	L4.10	unique		65	male	SPAIN	-	CASTELLON	no	no	no	no	no	no	no	positive	positive	pulmonary	initial	2015	2015-12-12	2015-12-29	2015-12-28	NO
G1740	PRJEB38719	ERR4195825	223.9	L4.3.2	unique		73	male	SPAIN	-	CASTELLON	yes	no	no	no	no	yes	no	positive	positive	pulmonary	initial	2016	2015-11-03	2016-02-10	2016-02-08	YES
G1741	PRJEB38719	ERR4195826	266.8	L4.10	unique		66	female	RUMANIA	2005	CASTELLON	no	no	no	no	no	no	no	positive	positive	pulmonary	initial	2016	2016-03-09	2016-04-15	2016-04-15	NO
G1743	PRJEB38719	ERR4195443	285.9	L4.10	unique		29	female	RUMANIA	2004	CASTELLON	no	no	no	no	no	yes	no	negative	positive	pulmonary	initial	2016	2016-09-19	2016-10-26	2016-10-26	NO
G1750	PRJEB38719	ERR4195350	83.6	L4.3.2	unique		43	male	MOROCCO	2000	CASTELLON		no	yes	no	no	yes	no	positive	positive	pulmonary	initial	2016	2016-10-16	2016-10-27	2016-10-26	NO
G1751	PRJEB38719	ERR4195829	117.7	L4.3.3	unique		58	male	SPAIN	-	CASTELLON	no	no	no	no	no	no	no	positive	positive	pulmonary	initial	2016	2016-01-15	2016-02-22	2016-02-22	NO
G1754	PRJEB38719	ERR4195356	226.2	L4.1.2.1	unique		53	male	RUMANIA	2000	CASTELLON	no	no	no	no		no	no	positive	positive	pulmonary	initial	2016	2015-11-15	2016-01-25	2016-01-25	NO
G1757	PRJEB38719	ERR4195831	107.7	L4.2.1	unique		33	male	RUMANIA	2003	CASTELLON	no	no	no	no	no	no	no	negative	positive	pulmonary	initial	2016	2016-04-23	2016-07-07	2016-07-07	NO
G1758	PRJEB38719	ERR4195832	156.0	L4.3.3	unique		46	male	SPAIN	-	CASTELLON	yes	no	no	no	no	no	no	positive	positive	pulmonary	initial	2016	2016-01-29	2016-02-29	2016-02-29	NO
G1760	PRJEB38719	ERR4195331	154.8	L4.3.4.2	unique		72	male	SPAIN	-	CASTELLON	no	no	no	no	no	no	no	negative	positive	extrapulmonary	initial	2016	2016-02-09	2016-03-18	2016-02-23	NO
G1762	PRJEB38719	ERR4195834	133.5	L4.3.2	unique		56	male	SPAIN	-	CASTELLON	yes	no	no	no	no	yes	no	positive	positive	pulmonary	initial	2016	2016-03-02	2016-03-10	2016-03-10	NO
G1764	PRJEB38719	ERR4195434	137.4	L4.1.2.1	unique		54	male	MOROCCO	1999	CASTELLON	no	no	no	no	no	no	no	negative	positive	pulmonary	initial	2016	2016-08-10	2016-09-08	2016-09-08	NO
G1765	PRJEB38719	ERR4195836	172.5	L4.10	unique		85	male	SPAIN	-	CASTELLON	no	no	no	yes	no	no	no	positive	positive	pulmonary	initial	2016	2015-09-15	2016-02-22	2016-02-22	YES
G1766	PRJEB38719	ERR4195837	82.0	L4.3.4.2	unique		71	male	SPAIN	-	CASTELLON	no	no	no	yes	no	no	no	negative	positive	pulmonary	initial	2016	2016-06-26	2016-08-12	2016-08-09	NO
G1767	PRJEB38719	ERR4195838	83.2	L4.10	unique		34	female	SPAIN	-	CASTELLON	no	no	no	no	no	no	no	negative	positive	pulmonary	initial	2016	2016-09-23	2016-10-28	2016-10-28	NO
G1768	PRJEB38719	ERR4195839	131.0	L4.1.2.1	unique	NA	NA	NA	NA	NA	CASTELLON	NA	NA	NA	NA	NA	no	NA	NA	NA	NA	NA	NA	NA	NA	NA	NA
G1773	PRJEB38719	ERR4195333	160.8	L4.1.2.1	unique	2137	26	female	RUMANIA	2012	CASTELLON	no	no	no	no	no	no	no	positive	positive	pulmonary	initial	2016	2016-04-11	2016-04-18	2016-04-18	NO
G1774	PRJEB38719	ERR4195438	103.9	L4.10	unique		86	male	SPAIN	-	CASTELLON	no	no	no	no	no	no	no	negative	positive	extrapulmonary	initial	2016	2015-05-01	2016-02-05	2016-02-04	YES
G1780	PRJEB38719	ERR4195309	141.1	L4.1.2.1	unique		41	male	RUMANIA	2005	VALENCIA	yes	no	no	no	no	no	no	positive	positive	pulmonary	initial	2016	2016-09-10	2016-11-10	2016-11-10	NO
G1783	PRJEB38719	ERR4195432	159.7	L4.1.2.1	unique		83	male	SPAIN	-	ALICANTE	no	no	no	no	no	no	no	negative	positive	pulmonary	initial	2016	2016-09-13	2016-11-24	2016-11-24	NO
G1787	PRJEB38719	ERR4195270	163.1	L4.10	unique	2244	83	female	SPAIN	-	VALENCIA	no	no	no	no	no	no	no	positive	positive	pulmonary	initial	2016	2016-08-17	2016-08-29	2016-08-29	NO
G1795	PRJEB38719	ERR4195383	163.7	L4.1.2.1	unique		46	male	SPAIN	-	ALICANTE	no	no	no	no	no	no	no	positive	positive	pulmonary	initial	2016	2015-11-03	2016-10-09	2016-10-07	YES
G1800	PRJEB38719	ERR4195305	112.6	L2.2.1	unique		22	female	ECUADOR	2001	VALENCIA	no	no	no	no	no	no	no	negative	positive	pulmonary	initial	2016	2016-09-01	2016-11-07	2016-11-07	NO
G1801	PRJEB38719	ERR4195844	112.1	L4.10	unique		50	male	RUMANIA	2014	VALENCIA	yes	no	no	no	no	no	no	positive	positive	pulmonary		2016	2016-07-25	2016-08-05	2016-08-04	NO
G1807m	PRJEB38719	ERR4195394	166.5	L2.2.1.2	unique		21	male	BHUTAN	2016	VALENCIA	no	no	no	no	no	no	no	positive	positive	pulmonary	initial	2016	2016-08-01	2016-11-05	2016-11-04	YES
G1817	PRJEB38719	ERR4195498	121.7	L4.1.1.1	unique		52	male	SPAIN	-	VALENCIA	yes	no	no	no	no	no	no	positive	positive	pulmonary	initial	2016	2016-09-20	2016-10-28	2016-09-28	NO
G1818	PRJEB38719	ERR4195847	145.0	L4.1.1	unique		32	female	ECUADOR	2003	VALENCIA	no		no	no		no	no	negative	positive	extrapulmonary	previous treatment	2016	2016-07-19	2016-11-15	2016-11-15	YES
G1819	PRJEB38719	ERR4195848	125.1	L4.3.2	unique		61	male	BOLIVIA	2004	VALENCIA	no	yes	no	no	yes	no	no	negative	positive	pulmonary	initial	2016	2016-11-14	2016-11-15	2016-11-14	NO
G1822	PRJEB38719	ERR4195391	141.7	L4.6.2.2	unique		3	female	GUINEA EQU	2016	VALENCIA	no	no	no	no	no	no	no	negative	positive	pulmonary	initial	2016	2016-10-18	2016-11-23	2016-11-23	NO
G1824	PRJEB38719	ERR4195850	123.0	L4.1.2.1	unique		46	male	SPAIN	-	VALENCIA	yes	no	no	no	no	no	no	positive	positive	pulmonary	initial	2016	2016-09-08	2016-11-07	2016-11-07	NO
G1825	PRJEB38719	ERR4195851	133.4	L4.10	unique		41	male	LITHUANIA	2015	ALICANTE	no	no	no	no	no	no	no	positive	positive	pulmonary	initial	2016	2016-08-17	2016-10-13	2016-10-12	NO
G1826	PRJEB38719	ERR4195852	165.6	L4.3.2	unique		62	female	SPAIN	-	ALICANTE	no	no	no	no	no	no	no	positive	positive	pulmonary	initial	2016	2016-09-04	2016-10-07	2016-10-06	NO
G1827	PRJEB38719	ERR4195853	92.5	L4.10	unique		40	female	SPAIN	-	ALICANTE			no	no	no	no	no	negative	positive	pulmonary	initial	2016	2016-08-05	2016-08-27	2016-08-26	NO
G1831	PRJEB38719	ERR4195500	65.8	L4.3.3	unique		54	female	GERMANY	1999	VALENCIA	no	no	no	no	yes	no	no	negative	positive	pulmonary	initial	2016	2016-06-21	2016-06-21	2016-06-21	NO
G1836	PRJEB38719	ERR4195401	176.4	L4.1.2.1	unique		66	male	SPAIN	-	VALENCIA		no	no	no	no	no	no	negative	positive	pulmonary	initial	2016	2016-08-19	2016-09-16	2016-09-16	NO
G1837	PRJEB38719	ERR4195856	127.0	L4.6.2.2	unique	NA	NA	NA	NA	NA	VALENCIA	NA	NA	NA	NA	NA	no	NA	NA	NA	NA	NA	NA	NA	NA	NA	NA
G1841	PRJEB38719	ERR4195857	95.0	L4.10	unique	NA	NA	NA	NA	NA	CASTELLON	NA	NA	NA	NA	NA	no	NA	NA	NA	NA	NA	NA	NA	NA	NA	NA
G1850	PRJEB38719	ERR4195360	75.2	L4.10	unique		73	male	SPAIN	-	VALENCIA	no	no	no	no	no	no	no	positive	positive	extrapulmonary	initial	2016	2016-08-07	2016-12-27	2016-12-27	YES
G1870	PRJEB38719	ERR4195501	135.8	L4.10	unique		85	male	SPAIN	-	VALENCIA	no	no	no	no	no	no	no	negative	positive	extrapulmonary	initial	2016	2016-04-26	2016-07-24	2016-07-22	NO
G1885	PRJEB38719	ERR4195502	131.6	L4.10	unique		74	male	SPAIN	-	VALENCIA	no	no	no	no	no	no	no	positive	positive	pulmonary	initial	2016	2016-10-23	2016-12-21	2016-12-21	NO
G1900	PRJEB38719	ERR4195503	151.5	L4.3.4.1	unique		47	male	SPAIN	-	ALICANTE	yes	no	no	no	no	no	no	positive	positive	pulmonary	initial	2016	2016-11-10	2016-11-21	2016-11-21	NO
G1906	PRJEB38719	ERR4195862	217.5	L4.1.1.3	unique		37	female	SPAIN	-	VALENCIA	no	no	no	no	no	no	no	negative	positive	pulmonary	initial	2016	2016-09-19	2016-12-15	2016-12-15	NO
G1918	PRJEB38719	ERR4195279	96.8	L4.1.2.1	unique		36	male	GUINEA	2012	VALENCIA						no	no	positive	positive	pulmonary	initial	2016	2016-11-26		2016-12-17	NO
G1924	PRJEB38719	ERR4195413	115.4	L4.4.1.1	unique	2408	26	female	BULGARIA	2015	VALENCIA	no	no	no	no		no	no	negative	positive	pulmonary	initial	2016	2016-11-30	2017-02-16	2016-12-18	NO
G1934	PRJEB38719	ERR4195412	136.2	L4.10	unique		70	male	SPAIN	-	VALENCIA	no	no	no	yes	no	no	no	negative	positive	pulmonary	initial	2016	2016-11-30	2016-12-19	2016-12-19	NO
G1940	PRJEB38719	ERR4195866	102.3	L4.10	unique		55	male	SPAIN	-	VALENCIA	no	no	no	no	no	no	no	positive	positive	pulmonary	initial	2016	2016-10-15	2016-12-28	2016-12-23	NO
G1941	PRJEB38719	ERR4195867	233.5	L4.1.2.1	unique		59	male	RUMANIA	2016	VALENCIA	yes	no	no	no		no	no	positive	positive	pulmonary		2016	2016-10-26	2016-11-25	2016-11-25	NO
G1942	PRJEB38719	ERR4195868	169.1	L4.3.4.1	unique		59	female	ARGENTINA	1986	VALENCIA	no	no	no	no	no	no	no	positive	positive	pulmonary	initial	2016	2016-03-09	2016-12-09	2016-12-09	YES
G1943	PRJEB38719	ERR4195869	153.3	L4.6.2.2	unique		23	male	GUINEA EQU	2016	VALENCIA	no	no	no	no	no	no	no	positive	positive	pulmonary	initial	2016	2016-10-14	2016-12-15	2016-12-15	NO
G1944	PRJEB38719	ERR4195870	168.9	L4.4.1.1	unique		34	female	REPUBLICA CHECA	1999	VALENCIA	no	no	no	no		no	no	positive	positive	pulmonary	initial	2016	2016-12-10	2016-12-23	2016-12-22	NO
G1945	PRJEB38719	ERR4195871	215.9	L4.3.2	unique		82	male	SPAIN	-	VALENCIA	no	no	no	no	no	no	no	negative	positive	extrapulmonary	initial	2016	2016-09-15	2016-11-04	2016-11-04	NO
G1959	PRJEB38719	ERR4195347	82.6	L4.1.2.1	unique	NA	NA	NA	NA	NA	VALENCIA	NA	NA	NA	NA	NA	no	NA	NA	NA	NA	NA	NA	NA	NA	NA	NA
G1961	PRJEB38719	ERR4195372	88.6	L5	unique	NA	NA	NA	NA	NA	VALENCIA	NA	NA	NA	NA	NA	no	NA	NA	NA	NA	NA	NA	NA	NA	NA	NA
G1966	PRJEB38719	ERR4195507	108.8	L4.1.3	unique		26	male	SPAIN	-	ALICANTE	no	no	no	no	no	no	no	positive	positive	pulmonary	initial	2016	2015-10-15	2016-04-07	2016-04-06	YES
G1968	PRJEB38719	ERR4195398	132.4	L4.10	unique	2363	44	female	SPAIN	-	ALICANTE	no	no	no	no	no	no	no	negative	positive	pulmonary	initial	2016	2015-12-03	2016-11-17	2016-11-16	YES
G2051	PRJEB38719	ERR4195509	47.1	L4.3.4.2	unique		86	male	SPAIN	-	CASTELLON	no	no	no	no	no	no	no	positive	positive	pulmonary	initial	2016	2016-10-17	2016-11-24	2016-11-24	NO
G2057	PRJEB38719	ERR4195510	72.2	L4.3.3	unique		67	female	SPAIN	-	CASTELLON	no	no	no	no	no	no	no	negative	positive	extrapulmonary	initial	2016	2016-12-11	2016-12-19	2016-12-19	NO
G2063	PRJEB38719	ERR4195875	93.9	L4.3.4.2	unique		34	male	MOROCCO	2002	ALICANTE	no	no	no	no	no	no	no	negative	positive	pulmonary	initial	2013	2013-05-03	2013-05-10	2013-05-10	NO
G2075	PRJEB38719	ERR4195876	102.0	L4.3.4.2	unique		43	female	DOMINICAN REP	2000	CASTELLON	no	no	no	no	no	no	no	positive	positive	pulmonary	initial	2016	2016-08-01	2016-12-23	2016-12-23	YES
G2102	PRJEB29604	ERR2884680	83.1	L4.3.4.2	unique		33	female	SPAIN	-	VALENCIA	no	no	no	no	no	no	no	negative	positive	pulmonary	initial	2016	2016-08-24	2017-03-31	2016-09-15	NO
