# Supplementary material for: Population-based sequencing of Mycobacterium tuberculosis reveals how current population dynamics are shaped by past epidemics
Source: eLife. 2022 Jul 26;11:e76605. doi: 10.7554/eLife.76605 (PMC9323001; doi:10.7554/eLife.76605)
Supplement: Supplementary file 3. — clinical and epidemiological data for all culture positive cases and sequenced samples reported between 2014 and 2016 in Valencia region. [file elife-76605-supp3.xlsx]

## Sheet: Supplementary_File_3
Supplementary File 3. Demographic. clinical and epidemiological data for all culture positive cases and sequenced samples reported between 2014 and 2016 in Valencia Region.
Characteristic	Reported cases (n=1388)	Culture positive cases (n=1019)	WGS patients (n=724)
Age (years)
≤ 15	92 (6.6%)	23 (2.2%)	20 (2.8%)
16-24	116 (8.4%)	70 (6.8%)	57 (7.9 %)
25-44	543 (39.1%)	413 (40.5%)	287 (39.6%)
45-65	417 (30%)	338 (33.1%)	238 (32.9%)
≥ 66	220 (15.9%)	175 (17.1%)	122 (16.8%)
Sex
Female	543 (39.1)	381 (37.4%)	273 (37.7%)
Male	845 (60.9%)	638 (62.6%)	451 (62.3%)
Place of birth
Spanish-born	884 (63.7%)	682 (67%)	456 (63%)
Foreign-born	504 (36.3)	337 (33%)	268 (37%)
Sputum smear
Positive	653 (47%)	575 (56.4%)	418 (58%)
Negative	682 (49.1%)	439 (43.1%)	302 (42%)
Disease type
Pulmonary	1028 (74.1%)	832 (81.6%)	594 (82%)
Extrapulmonary	360 (25.9%)	187 (18.3%)	130 (18%)
Social risk factors			205 (29.9%)
Alcohol abuse	204 (16%)	181 (17.7%)	138 (20.3%)a
PDU	34 (2.6%)	26 (2.7%)	28 (4.1%)b
Imprisonment	54 (4%)	45 (4.4%)	39 (5.5%)c
Diabetes	134 (9.8%)	110 (10.7%)	74 (10.4%)d
HIV infected	80 (6.3%)	61 (5.9%)	51 (7.7%)e
Homeless	65 (4.7%)	58 (5.7%)	49 (7.0%)f
Healthcare workers	35 (2.5%)	24 (2.3%)	14 (2%)g
Diagnostic delay	345 (26.3%)	264 (25.9%)	180 (24.8%)h
an=681
bn=683
cn=707
dn=713
en=660
fn=696
gn=719
hn=700
