# Supplementary material for: Population-based sequencing of Mycobacterium tuberculosis reveals how current population dynamics are shaped by past epidemics
Source: eLife. 2022 Jul 26;11:e76605. doi: 10.7554/eLife.76605 (PMC9323001; doi:10.7554/eLife.76605)
Supplement: Supplementary file 4. — Age, sex, place of birth, sputum smear, and disease type were considered in the analysis for all TB cases and for Spanish-born only. [file elife-76605-supp4.xlsx]

## Sheet: Supplementary_File_4
Supplementary File 4. Statistical analysis of clustered versus unique TB cases. Age; sex; place of birth; sputum smear; disease type were considered in the analysis for all TB cases and for Spanish-born only.
	All patients (724)						Spanish born (456)
Characteristics	Clustered cases (%)	Unique cases (%)	odds ratio [95 % CI]*	p-value*	odds ratio [95 % CI]✝	p-value✝	Clustered cases (%)	Unique cases (%)	odds ratio [95 % CI]	p-value*
Age
≤ 15	17 (85.0)	3 (15.0)	6.53 [1.83-35.51]	< 0.001	3.72 [1.13-16.87]	< 0.05	16 (88.9)	2 (11.1)	5.45 [1.21-50.67]	< 0.001
16-24	20 (35.1)	37 (64.9)	0.63 [0.33-1.17]	0.145	0.68 [0.33-1.35]	0.28	12 (57.1)	9 (42.9)	0.97 [0.33-2.64]	1
25-44	133 (46.3)	154 (53.7)	reference				83 (59.3)	57 (40.7)	reference
45-64	93 (39.1)	145 (60.9)	0.74 [0.52-1.07]	0.111	0.62 [0.40-0.96]	< 0.05	74 (45.4)	89 (54.6)	0.57 [0.35-0.92]	0.021
> 65	36 (29.5)	86 (70.5)	0.49 [0.30-0.78]	< 0.001	0.29 [0.16-0.51]	< 0.001	31 (27.2)	83 (72.8)	0.26 [0.14-0.45]	< 0.001
Sex
Male	197 (43.7)	254 (56.3)	1.3 [0.94-1.79]	0.102	1.47 [1.01-2.16]	< 0.05	141 (49.8)	142 (50.2)	1.07 [0.72-1.59]	0.775
Female	102 (37.4)	171 (62.6)	reference				75 (43.4)	98 (56.6)	reference
Place of Birth
Spanish	216 (47.4)	240 (52.6)	2.00 [1.44-2.79]	< 0.001	2.83 [1.87-4.32]	< 0.001
Foreign	83 (31)	185 (69)	reference
Sputum smear
Positive	184 (44)	234 (56)	1.32 [0.96-1.80]	0.078	**		129 (50)	129 (50)	1.29 [0.87-1.91]	0.186
Negative	113 (37.4)	189 (62.6)	reference				86 (43.7)	111 (56.3)	reference
Disease type
Pulmonay	267 (45)	327 (55)	2.5 [1.60-3.98]	< 0.001	1.66 [1.01-2.77]	< 0.05	196 (51)	188 (49)	2.70 [1.52-4.97]	< 0.001
Extrapulmonary	32 (24.6)	98 (75.4)	reference				20 (27.8)	52 (72.2)	reference
Risk factors
Alcohol abuse
Yes	67 (48.5)	71 (51.5)	1.35 [0.91-2.00]	0.123	**		47 (54)	40 (46)	1.32 [0.80-1.72]	0.281
No	223 (41.1)	320 (58.9)	reference				165 (47.1)	185 (52.9)	reference
PDU
Yes	12 (42.9)	16 (57.1)	1.05 [0.44-2.41]	1	**		9 (47.4)	10 (52.6)	1.00 [0.35-2.80]	1
No	273 (41.7)	382 (58.3)	reference				197 (47.3)	219 (52.7)	reference
Imprisonment
Yes	20 (51.3)	19 (48.7)	1.53 [0.76-3.09]	0.241	2.15 [0.96-5.00]	0.07	16 (59.3)	11 (40.7)	1.64 [0.70-4.02]	0.237
No	272 (40.7)	396 (59.3)	reference				198 (47)	224 (53)	reference
Diabetes
Yes	31 (41.9)	43 (58.1)	1.02 [0.61-1.71]	1	**		25 (41.7)	35 (58.3)	0.76 [0.42-1.37]	0.405
No	264 (41.3)	375 (58.7)	reference				188 (48.3)	201 (51.7)	reference
HIV infected
Yes	21 (41.2)	30 (58.8)	0.97 [0.52-1.80]	1	**		15 (48.4)	16 (51.6)	1.02 [0.48-2.28]	1
No	255 (41.9)	354 (58.1)	reference				186 (47.8)	203 (52.2)	reference
Homeless
Yes	16 (32.6)	33 (67.3)	0.59 [0.30-1.13]	0.10	0.48 [0.18-1.17]	0.12	17 (63)	10 (37)	1.67 [0.70-4.19]	0.12
No	274 (45.2)	332 (54.8)	reference				202 (50.3)	199 (49.7)	reference
Health care workers
Yes	9 (64.3)	5 (35.7)	2.60 [0.77-9.99]	0.100	**		9 (64.3)	5 (35.7)	2.03 [0.60-7.85]	0.278
No	288 (40.9)	417 (59.1)	reference				206 (46.9)	233 (53.1)	reference
Diagnostic delay
Yes	66 (36.7)	114 (63.3)	0.78 [0.54-1.12]	0.161	**		46 (40)	69 (60)	0.64 [0.41-1.01]	0.050
No	222 (42.7)	298 (57.3)	reference				162 (51)	156 (49)	reference
* Fisher’s exact test
✝ Logistic regression. The best model model it includes age, gender, place of birth, imprisonment, disease type and homelesness. Goodness of fit was tested with Hosmer-Lemeshow test (p=0.69. indicating there is not enough evidence to say it is a poor fit)
**Risk factor not included in the best logistic regression model choosen by stepwise method
