# Supplementary material for: Population-based sequencing of Mycobacterium tuberculosis reveals how current population dynamics are shaped by past epidemics
Source: eLife. 2022 Jul 26;11:e76605. doi: 10.7554/eLife.76605 (PMC9323001; doi:10.7554/eLife.76605)
Supplement: Supplementary file 5. — Clusters identified by epidemiological links were compared against genomic clustering. Similarities and discrepancies between both methods are described for all samples. Cluster size and pairwise distance among the samples included in the cluster are mentioned. Median time and 95% HPD (highest posterior density) of the most common ancestor (tMRCA) for the cluster obtained by both approaches are provided. For mean and median values. Only the clusters with tMRCA were considered. [file elife-76605-supp5.xlsx]

## Sheet: Supplementary_File_5
Supplementary File 5. Epidemiological cluster evaluation. Clusters identified by epidemiological links were compared against genomic clustering. Similarities and discrepancies between both methods are described for all samples. Cluster size and pairwise distance among the samples included in the cluster are mentioned. Median time and 95% HPD (Highest Posterior Density) of the most common ancestor…
	Sample ID	TR_CL_ID	WGS cluster ID	EPI cluster ID	WGS link no identified by EPI	WGS cluster size	EPI cluster size	min SNP distance WGS cluster	Pairwise distance WGS	tMRCA
19 epidemiological clusters without WGS in pair samples. all were WGS uniques	G856m	unique	unique	1577			3
	G179	unique	unique	1611			2
	G149	unique	unique	1619			2
	G183	unique	unique	1649			2
	G402m	unique	unique	1666			3
	G280	unique	unique	1679			2
	G111	unique	unique	1681			2
	G67m	CL075	unique	1742			2
	G757m	unique	unique	1796			2
	G888	CL076	unique	1862			2
	G1452	unique	unique	1971			2
	G1773	unique	unique	2137			2
	G1489	unique	unique	2160			2
	G1664	unique	unique	2165			2
	G1611	unique	unique	2187			2
	G1787	unique	unique	2244			2
	G1968	unique	unique	2363			2
	G1924	CL095	unique	2408			2
	G1711	unique	unique	2542			2
epidemiological clusters without WGS in pair samples. all were included in different WGS clusters. except**	G881m	CL011	CL011	1784	x	6	2	0 SNPs
	G19	CL020	CL020	1584	x	4	2	2 SNPs
	G83	CL021	CL021	1598	x	3	3	7 SNPs
	G1644	CL023	CL023	2270	x	4	2	6 SNPs
	G25	CL051	CL051	1573	x	2	2	2 SNPs
	G1421	CL074	CL074	2104	x	2	2	5 SNPs
	G1752	CL079	CL079	2202	x	2	2	9 SNPs
	G768m	CL081	CL081	1861	x	3	2	11 SNPs
	G1647	CL083	CL083	2204	x	3	2	7 SNPs
	G1627	CL087	CL087	2239	x	3	2	1 SNP
	G1604	CL091	CL091	2541	x	3	2	0 SNPs
	G1835	CL099	CL099	2262	x	2	2	10 SNPs
	G1464	CL101	CL101	2303	x	2	2	8 SNPs
	G1925	CL103	CL103	2346	x	2	2	6 SNPs
	G1507	CL089	CL089	2054**	x**	3	4	2 SNPs	4 SNPs
	G1803	CL089	CL089	2268**	x**	3	2	4 SNPs
	G882m	CL002	CL0021	22261	x1	12	2	0 SNPs
	G1965	CL010	CL0101	21411	x1	6	2	1 SNP
	G917	CL016	CL0161	18761	x1	6	2	0 SNPs
epidemiological clusters in agreement with WGS clusters	G1128	CL029	CL029	2016		2	2		0 SNPs	2013-09-01
	G1562	CL029	CL029	2016						[2009.5-2015.3]
	G474m	CL038	CL038	1561		2	2		2 SNPs	2007-07-01
	G84	CL038	CL038	1561						[1999.7-2012.9]
	G1258	CL042	CL042	1602		2	2		1 SNP	2010-08-01
	G128	CL042	CL042	1602						[2005.1-2013.7]
	G1360	CL056	CL056	2070		2	2		2 SNPs	2010-09-01
	G1420	CL056	CL056	2070						[2004.3-2015.1]
	G1199	CL058	CL058	1891		2	2		2 SNPs	2009-04-01
	G1200	CL058	CL058	1891						[2001.7-2014.2]
	G675	CL060	CL060	1804		2	2		4 SNPs	2007-09-01
	G832m	CL060	CL060	1804						[2001.4-2013.2]
	G1564	CL116	CL116	2090		2	2		0 SNPs	2014-04-01
	G1742	CL116	CL116	2090						[2010.7-2015.5]
	G1285	CL119	CL119	2001		2	2		0 SNPs	2013-07-01
	G1334	CL119	CL119	2001						[2009-2015.1]
	G1023	CL039	CL039	1863		2	2		0 SNPs	2013-06-01
	G945	CL039	CL039	1863						[2008.9-2014.9]
epidemiological clusters in agreement with WGS clusters. but later including more samples not identified by epidemiological links	G1590	CL007	CL007	1397		5	2		1 SNP
	G249	CL007	CL007	1397
	G693m	CL008	CL008	1786		4	2		11 SNPs	2000.2#
	G764m	CL008	CL008	1786						[1992-2008.1]#
	G262	CL017	CL017	1714		3	2		1 SNP	2007.7#
	G641m	CL017	CL017	1714						[2001.8-2012.2]#
	G990	CL019	CL019	1837		4	3		0-1 SNPs
	G991	CL019	CL019	1837						2011-06-01
	G992	CL019	CL019	1837						[2007.2-2014.6]
	G1537	CL034	CL034	2231		4	2		1 SNP	2010#
	G1786	CL034	CL034	2231						[2004.3-2013.6]#
	G1513	CL037	CL037	1818		4	3		0 SNPs
	G766m	CL037	CL037	1818						2011.3#
	G817m	CL037	CL037	1818						[2005.8-2014.8]#
	G164	CL068	CL068	1664		3	2		4 SNPs	2000.5#
	G168	CL068	CL068	1664						[1989.8-2007.7]#
	G1648	CL069	CL069	2191		5	3		0-4 SNPs
	G1653	CL069	CL069	2191						2006.8#
	G1785	CL069	CL069	2191						[1998.9-2013]#
	G1544	CL072	CL072	2144		5	2		0 SNPs	2014-08-01
	G1630	CL072	CL072	2144						[2010.9-2015.9]
	G1494	CL078	CL078	2116		4	2		0 SNPs	2008.4#
	G1495	CL078	CL078	2116						[2001-2013.1]#
	G1661	CL082	CL082	2189		3	2		3 SNPs	2007-09-01
	G1693	CL082	CL082	2189						[2000.1-2014.1]
	G1359	CL110	CL110	2046		3	2		1 SNP	2012-03-01
	G1496	CL110	CL110	2046						[2007.3-2015.4]
	G1011	CL002	CL0121	1959		12	2		1 SNP	2010.2#
	G1449	CL002	CL0121	1959						[2005.8-2013.7]#
	G1180	CL010	CL0101	1948		6	2		1 SNP	2013
	G1181	CL010	CL0101	1948						[2009.1-2015.2]
	G1570	CL016	CL0161	2147		6	2		0 SNPs	2013-09-01
	G1578	CL016	CL0161	2147						[2008.1-2015.6]
epidemiological clusters in different WGS clusters	G1616	CL055	CL055	2233		3*	2		727 SNPs
	G1967	CL093	CL093	2233		3*
	G1621	CL078	CL078	2208		4*	2		681 SNPs
	G1620	CL115	CL115	2208		2*
epidemiological clusters not identified by WGS	G1270	unique	unique	1918		uniques	2		1184 SNPs
	G870m	unique	unique	1918		uniques
	G1498	unique	unique	2119		uniques	2		635 SNPs
	G1499	unique	unique	2119		uniques
								mean	1 SNP	38120.7
								meadian	1.7 SNPs
1disagreement between WGS and epidemiological links. Epi cluster without partner sequences but included in a genomic cluster with samples from another epi cluster
**different epi cluster. but same genomic cluster
*same epi cluster but different genomic cluster
#tMRCA include more samples
