# Supplementary material for: Population-based sequencing of Mycobacterium tuberculosis reveals how current population dynamics are shaped by past epidemics
Source: eLife. 2022 Jul 26;11:e76605. doi: 10.7554/eLife.76605 (PMC9323001; doi:10.7554/eLife.76605)
Supplement: Supplementary file 6. — Values were extracted from 724 clinical TB isolates and assumed epidemiological links from contact tracing as the gold standard. NPV, negative predictive value; PPV, positive predictive value. [file elife-76605-supp6.xlsx]

## Sheet: Supplementary_File_6
Supplementary File 6. Performance of the WGS method for transmission. Values were extracted from 724 clinical TB isolates and assumed epidemiological links from contact tracing as the gold standard. Abbreviations: PPV. positive predictive value; NPV. negative predictive value.
SNPs threshold	Total patients in cluster	Cluster patients with epidemiological link	Sensitivity	Specificity	PPV	NPV	Accuracy
12	299	51	86.4 (72.0-94.0)	62.7 (58.9-66.4)	17.1 (15.2-19.2)	98.1 (96.5-99.0)	64.6 (61.0-68.1)
5	242	50	84.8 (73.0-92.8)	71.1 (67.5-74.6)	20.7 (18.1-23.4)	98.1 (96.6-99.0)	72.2 (68.8-75.5)
0	107	24	40.7 (28.1-54.3)	87.5 (84.8-89.9)	22.4 (16.7-29.5)	94.3 (93.1-95.4)	83.7 (80.8-86.3)
