# Supplementary material for: Population-based sequencing of Mycobacterium tuberculosis reveals how current population dynamics are shaped by past epidemics
Source: eLife. 2022 Jul 26;11:e76605. doi: 10.7554/eLife.76605 (PMC9323001; doi:10.7554/eLife.76605)
Supplement: Supplementary file 7. [file elife-76605-supp7.xlsx]

## Sheet: Supplementary_File_7
Supplementary File 7. Patients mean age for those cases within genomic clusters which ancestors’ age are included in different time windows in Valencia Region
Cluster period	age mean	t	df	p-value*
2016-2011	48.1	reference
2011-2006	42.4	-1.38	78.5	0.17
2006-2001	40.1	-1.62	57.8	0.11
2001-1996	47.9	-0.03	52.5	0.97
1996-1991	43.8	-0.87	40.7	0.39
1991-1986	43.4	1.13	45.2	0.27
1986-1981	43.5	-0.63	2022-05-16	0.53
*Welch Two Sample t-test
